# Supplementary material for: The effect of hetero-atoms on spin exchange coupling pathways (ECPs): a computational investigation
Source: Royal Society of Chemistry journal article supplement (doi:10.1039/d3cp00394a), 2023-01-01
Supplement: d3cp00394a1.pdf [file d3cp00394a1.pdf]

## Hetero-atoms on spin exchange coupling pathways (ECPs): A computational investigation

Suranjan Shil,<sup>1\*</sup> Debojit Bhattacharya,<sup>2,5</sup> Anirban Misra,<sup>3</sup> Yenni P. Ortiz<sup>4,5</sup> and Douglas J. Klein<sup>5</sup>

<sup>1</sup>Manipal Centre for Natural Sciences, Manipal Academy of Higher Education, Manipal 576104, India, \*Email: [suranjan.shil@manipal.edu](mailto:suranjan.shil@manipal.edu), Phone: +91-9434801574

<sup>2</sup>Kabi Sukanta High School, Siliguri734010, Darjeeling, West Bengal, India

<sup>3</sup>Department of Chemistry, University of North Bengal, Siliguri 734010, India

<sup>4</sup>Centro Internacional de Ciencias A.C., Avenida Universidad 1001, 62131 Cuernavaca, México

<sup>5</sup>MARS, Texas A&M University at Galveston, Galveston, 200 Seawolf Pkwy, Galveston, TX 77554, USA

Table S1. Energy (Hartree),  $S^2$  and magnetic exchange coupling Constant value of the Part-I (Set A) diradicals (B3LYP/6-311++G(d,p))

| Hetero atoms | Triplet     |       | BS          |       | $J$ (cm <sup>-1</sup> ) |
|--------------|-------------|-------|-------------|-------|-------------------------|
|              | E           | $S^2$ | E           | $S^2$ |                         |
| B            | -1387.15301 | 2.047 | -1387.15299 | 1.045 | 5.41                    |
| N            | -1417.08824 | 2.048 | -1417.08822 | 1.046 | 4.82                    |
| O            | -1436.93952 | 2.048 | -1436.93949 | 1.046 | 7.19                    |
| S            | -1759.92569 | 2.047 | -1759.92567 | 1.046 | 4.75                    |

Table S2. Energy (Hartree),  $S^2$  and magnetic exchange coupling Constant value of the Part-I (Set B) diradicals (B3LYP/6-311++G(d,p))

| Hetero atoms | Triplet     |       | BS          |       | $J$ (cm <sup>-1</sup> ) |
|--------------|-------------|-------|-------------|-------|-------------------------|
|              | E           | $S^2$ | E           | $S^2$ |                         |
| B            | -1387.15677 | 2.047 | -1387.15687 | 1.052 | -20.66                  |
| N            | -1417.08365 | 2.046 | -1417.08373 | 1.050 | -17.67                  |
| O            | -1436.94495 | 2.046 | -1436.94503 | 1.050 | -17.58                  |
| S            | -1759.92703 | 2.046 | -1759.92711 | 1.050 | -17.25                  |

Table S3. Energy (Hartree), S2 and magnetic exchange coupling Constant value of the Part-I (Set A) diradicals (M06/6-311++G(d,p))

| Systems | Triplet |             | BS             |             | $J$ (cm <sup>-1</sup> ) |                |
|---------|---------|-------------|----------------|-------------|-------------------------|----------------|
|         | Meta    | E           | S <sup>2</sup> | E           |                         | S <sup>2</sup> |
| B       |         | -1386.19841 | 2.05           | -1386.19838 | 1.04                    | 6.50           |
| C       |         | -1400.05965 | 2.05           | -1400.05962 | 1.04                    | 7.07           |
| N       |         | -1416.12156 | 2.05           | -1416.12153 | 1.04                    | 5.37           |
| O       |         | -1435.97563 | 2.05           | -1435.97560 | 1.04                    | 7.82           |
| S       |         | -1758.96197 | 2.05           | -1758.96194 | 1.04                    | 5.04           |

Table S4. Energy (Hartree), S2 and magnetic exchange coupling Constant value of the Part-I (Set B) diradicals (M06/6-311++G(d,p))

| Systems | Triplet |             | BS             |             | $J$ (cm <sup>-1</sup> ) |                |
|---------|---------|-------------|----------------|-------------|-------------------------|----------------|
|         | Para    | E           | S <sup>2</sup> | E           |                         | S <sup>2</sup> |
| B       |         | -1386.20111 | 2.04           | -1386.20120 | 1.05                    | -20.18         |
| C       |         | -1400.06053 | 2.04           | -1400.06061 | 1.05                    | -17.88         |
| N       |         | -1416.11659 | 2.04           | -1416.11667 | 1.05                    | -17.54         |
| O       |         | -1435.98086 | 2.04           | -1435.98094 | 1.05                    | -17.21         |
| S       |         | -1758.96200 | 2.04           | -1758.96208 | 1.05                    | -17.08         |

Table S5. Energy (Hartree), S2 and magnetic exchange coupling Constant value of the Part-I (Set A) diradicals (PBE0/6-311++G(d,p))

| Systems | Triplet |             | BS             |             | $J$ (cm <sup>-1</sup> ) |                |
|---------|---------|-------------|----------------|-------------|-------------------------|----------------|
|         | Meta    | E           | S <sup>2</sup> | E           |                         | S <sup>2</sup> |
| B       |         | -1385.56150 | 2.06           | -1385.56146 | 1.06                    | 9.50           |
| C       |         | -1399.43018 | 2.06           | -1399.43014 | 1.06                    | 10.24          |
| N       |         | -1415.48226 | 2.06           | -1415.48222 | 1.06                    | 8.01           |
| O       |         | -1435.31701 | 2.06           | -1435.31696 | 1.06                    | 10.87          |
| S       |         | -1758.22810 | 2.06           | -1758.22806 | 1.06                    | 8.01           |

Table S6. Energy (Hartree),  $S^2$  and magnetic exchange coupling Constant value of the Part-I (Set B) diradicals (PBE0/6-311++G(d,p))

| Systems | Triplet |             | BS    |             | $J$ (cm <sup>-1</sup> ) |        |
|---------|---------|-------------|-------|-------------|-------------------------|--------|
|         | Meta    | E           | $S^2$ | E           |                         | $S^2$  |
| B       |         | -1385.56474 | 2.06  | -1385.56487 | 1.07                    | -30.20 |
| C       |         | -1399.43129 | 2.06  | -1399.43141 | 1.06                    | -25.89 |
| N       |         | -1415.47702 | 2.06  | -1415.47714 | 1.06                    | -24.72 |
| O       |         | -1435.32210 | 2.06  | -1435.32222 | 1.06                    | -24.79 |
| S       |         | -1758.22848 | 2.06  | -1758.22859 | 1.06                    | -24.51 |

**Table S7.** Optimized B3LYP-level absolute energies ( $E$ , Hartree),  $\langle S^2 \rangle$ , and intramolecular exchange-coupling constants ( $J$ , cm<sup>-1</sup>) using the 6-311+G(d,p) basis set for each diradical (Part-II diradicals).

| Diradical |         | At B3LYP /6-311+G(d,p) level |                       |                         |
|-----------|---------|------------------------------|-----------------------|-------------------------|
|           |         | Energy                       | $\langle S^2 \rangle$ | $J$ (cm <sup>-1</sup> ) |
| B-ECP-I   | Triplet | -1377.942554                 | 2.0180                | -3.95                   |
|           | BS      | -1377.942572                 | 1.0189                |                         |
| C-ECP-I   | Triplet | -1391.803288                 | 2.0202                | -0.89                   |
|           | BS      | -1391.803292                 | 1.0199                |                         |
| N-ECP-I   | Triplet | -1407.845631                 | 2.0109                | -1.77                   |
|           | BS      | -1407.845639                 | 1.0112                |                         |
| O-ECP-I   | Triplet | -1427.710961                 | 2.0114                | - 1.09                  |
|           | BS      | -1427.710966                 | 1.0115                |                         |
| S-ECP-I   | Triplet | -1750.687859                 | 2.0118                | -0.88                   |
|           | BS      | -1750.687863                 | 1.0118                |                         |

**Table S8.** Optimized B3LYP-level absolute energies ( $E$ , Hartree),  $\langle S^2 \rangle$ , and intramolecular exchange-coupling constants ( $J$ ,  $\text{cm}^{-1}$ ) using the 6-311+G(d,p) basis set for each diradical (Part-II diradicals).

| Diradical |         | At B3LYP /6-311+G(d,p) level |                       |                          |
|-----------|---------|------------------------------|-----------------------|--------------------------|
|           |         | Energy                       | $\langle S^2 \rangle$ | $J$ ( $\text{cm}^{-1}$ ) |
| B-ECP-II  | Triplet | -1864.417331                 | 2.0237                | -8.13                    |
|           | BS      | -1864.417368                 | 1.0248                |                          |
| C-ECP-II  | Triplet | -1892.144268                 | 2.0232                | -1.76                    |
|           | BS      | -1892.144276                 | 1.0225                |                          |
| N-ECP-II  | Triplet | -1924.231012                 | 2.0224                | -7.02                    |
|           | BS      | -1924.231044                 | 1.0230                |                          |
| O-ECP-II  | Triplet | -1963.962023                 | 2.0220                | -7.24                    |
|           | BS      | -1963.962056                 | 1.0216                |                          |
| S-ECP-II  | Triplet | -2609.915538                 | 2.0237                | -1.10                    |
|           | BS      | -2609.915543                 | 1.0233                |                          |

**Table S9.** Optimized M06-level absolute energies ( $E$ , Hartree),  $\langle S^2 \rangle$ , and intramolecular exchange-coupling constants ( $J$ ,  $\text{cm}^{-1}$ ) using the 6-311+G(d,p) basis set for each diradical (Part-II diradicals).

| Diradical |         | At UM06/6-311+G(d,p) level |                       |                          |
|-----------|---------|----------------------------|-----------------------|--------------------------|
|           |         | Energy                     | $\langle S^2 \rangle$ | $J$ ( $\text{cm}^{-1}$ ) |
| B-ECP-I   | Triplet | -1376.901258               | 2.0247                | -12.53                   |
|           | BS      | -1376.901285               | 1.0259                |                          |
| C-ECP-I   | Triplet | -1390.75450                | 2.0279                | -2.19                    |
|           | BS      | -1390.75451                | 1.0272                |                          |
| N-ECP-I   | Triplet | -1406.795107               | 2.0117                | -1.97                    |
|           | BS      | -1406.795116               | 1.0122                |                          |
| O-ECP-I   | Triplet | -1426.661823               | 2.0122                | -2.20                    |
|           | BS      | -1426.661833               | 1.0124                |                          |
| S-ECP-I   | Triplet | -1749.638275               | 2.0121                | -1.98                    |
|           | BS      | -1749.638284               | 1.0123                |                          |

**Table S10.** Optimized M06-level absolute energies ( $E$ , Hartree),  $\langle S^2 \rangle$ , and intramolecular exchange-coupling constants ( $J$ ,  $\text{cm}^{-1}$ ) using the 6-311+G(d,p) basis set for each diradical (Part-II diradicals).

| Diradical |         | At UM06/6-311+G(d,p) level |                       |                          |
|-----------|---------|----------------------------|-----------------------|--------------------------|
|           |         | Energy(au)                 | $\langle S^2 \rangle$ | $J$ ( $\text{cm}^{-1}$ ) |
| B-ECP-II  | Triplet | -1863.001596               | 2.0304                | -15.91                   |
|           | BS      | -1863.001642               | 1.0319                |                          |
| C-ECP-II  | Triplet | -1890.709352               | 2.0293                | -1.97                    |
|           | BS      | -1890.709361               | 1.0284                |                          |
| N-ECP-II  | Triplet | -1922.795310               | 2.0283                | -7.91                    |
|           | BS      | -1922.795346               | 1.0293                |                          |
| O-ECP-II  | Triplet | -1962.531498               | 2.0277                | -8.12                    |
|           | BS      | -1962.531535               | 1.0273                |                          |
| S-ECP-II  | Triplet | -2608.480737               | 2.0297                | -3.51                    |
|           | BS      | -2608.480753               | 1.0292                |                          |

**Table S11.** Optimized UPBE0-level absolute energies ( $E$ , Hartree),  $\langle S^2 \rangle$ , and intramolecular exchange-coupling constants ( $J$ ,  $\text{cm}^{-1}$ ) using the 6-311+G(d,p) basis set for each diradical (Part-II diradicals).

| Diradical |         | At UPBE0/6-311+G(d,p) level  |                       |                          |
|-----------|---------|------------------------------|-----------------------|--------------------------|
|           |         | Energy                       | $\langle S^2 \rangle$ | $J$ ( $\text{cm}^{-1}$ ) |
| B-ECP-I   | Triplet | -1376.278158                 | 2.0255                | -6.81                    |
|           | BS      | -1376.278189                 | 1.0270                |                          |
| C-ECP-I   | Triplet | -1390.134742                 | 2.0292                | -1.97                    |
|           | BS      | -1390.134751                 | 1.0287                |                          |
| N-ECP-I   | Triplet | -1406.165548                 | 2.0133                | -3.30                    |
|           | BS      | -1406.165563                 | 1.0140                |                          |
| O-ECP-I   | Triplet | -1426.014462                 | 2.0142                | -1.98                    |
|           | BS      | -1426.014471                 | 1.0144                |                          |
| S-ECP-I   | Triplet | -1748.916022<br>-1748.916022 | 2.0147<br>2.014661    | -1.76                    |
|           | BS      | -1748.916030<br>1748.9160303 | 1.0148<br>1.01483     |                          |

**Table S12.** Optimized UPBE0-level absolute energies ( $E$ , Hartree),  $\langle S^2 \rangle$ , and intramolecular exchange-coupling constants ( $J$ ,  $\text{cm}^{-1}$ ) using the 6-311+G(d,p) basis set for each diradical (Part-II diradicals).

| Diradical |         | At UPBE0/6-311+G(d,p) level |                       |                          |
|-----------|---------|-----------------------------|-----------------------|--------------------------|
|           |         | Energy                      | $\langle S^2 \rangle$ | $J$ ( $\text{cm}^{-1}$ ) |
| B-ECP-II  | Triplet | -1862.170077                | 2.0326                | -11.03                   |
|           | BS      | -1862.170127                | 1.0345                |                          |
| C-ECP-II  | Triplet | -1889.888869                | 2.0316                | -0.88                    |
|           | BS      | -1889.888873                | 1.0308                |                          |
| N-ECP-II  | Triplet | -1921.953406                | 2.0300                | -9.23                    |
|           | BS      | -1921.953448                | 1.0312                |                          |
| O-ECP-II  | Triplet | -1961.651982                | 2.0297                | -6.80                    |
|           | BS      | -1961.652013                | 1.0294                |                          |
| S-ECP-II  | Triplet | -2607.454643                | 2.0324                | -1.10                    |
|           | BS      | -2607.454648                | 1.0319                |                          |

**Table S13: Spin density on the individual atoms of radical and their average for ECP-I diradicals with 6-311++G(d,p) basis set for all the functionals**

| Diradicals | Atoms   | B3LYP    | M06      | PBE0     |
|------------|---------|----------|----------|----------|
| B-ECP-I    | N       | 0.402733 | 0.373103 | 0.391855 |
|            | O       | 0.519188 | 0.501323 | 0.518571 |
|            | Average | 0.460961 | 0.437213 | 0.455213 |
|            | O       | 0.528377 | 0.501306 | 0.518559 |
|            | N       | 0.404025 | 0.373097 | 0.391847 |
|            | Average | 0.466201 | 0.437202 | 0.455203 |
| C-ECP-I    | N       | 0.376425 | 0.357996 | 0.361871 |
|            | O       | 0.502589 | 0.493321 | 0.518528 |
|            | Average | 0.439507 | 0.425659 | 0.4402   |
|            | O       | 0.50525  | 0.498023 | 0.515186 |
|            | N       | 0.382554 | 0.377398 | 0.376406 |
|            | Average | 0.443902 | 0.437711 | 0.445796 |
| N-ECP-I    | N       | 0.407837 | 0.396628 | 0.428542 |
|            | O       | 0.502339 | 0.52912  | 0.535683 |
|            | Average | 0.455088 | 0.462874 | 0.482113 |
|            | O       | 0.526997 | 0.517332 | 0.527229 |
|            | N       | 0.409977 | 0.39765  | 0.432984 |
|            | Average | 0.468487 | 0.457491 | 0.480107 |
| O-ECP-I    | N       | 0.421357 | 0.391955 | 0.42539  |
|            | O       | 0.520522 | 0.524038 | 0.530275 |
|            | Average | 0.47094  | 0.457997 | 0.477833 |
|            | O       | 0.514837 | 0.514775 | 0.524697 |
|            | N       | 0.427346 | 0.394003 | 0.431798 |
|            | Average | 0.471092 | 0.454389 | 0.478248 |
| S-ECP-I    | N       | 0.417499 | 0.390125 | 0.435325 |
|            | O       | 0.52013  | 0.519622 | 0.527161 |
|            | Average | 0.468815 | 0.454874 | 0.481243 |
|            | O       | 0.515611 | 0.511903 | 0.524696 |
|            | N       | 0.412381 | 0.3862   | 0.414275 |
|            | Average | 0.463996 | 0.449052 | 0.469486 |

**Table S14: Spin density on the individual atoms of radical and their average for ECP-II diradicals with 6-311+G(d,p) basis set for all the functionals**

| Diradicals | Atoms   | B3LYP    | M06      | PBE0     |
|------------|---------|----------|----------|----------|
| B-ECP-II   | N       | 0.346779 | 0.330173 | 0.348915 |
|            | O       | 0.483871 | 0.471829 | 0.494868 |
|            | Average | 0.415325 | 0.401001 | 0.421892 |
|            | O       | 0.483873 | 0.471829 | 0.494879 |
|            | N       | 0.346778 | 0.330173 | 0.348903 |
|            | Average | 0.415326 | 0.401001 | 0.421891 |
| C-ECP-II   | N       | 0.365583 | 0.331113 | 0.348788 |
|            | O       | 0.503955 | 0.478116 | 0.499928 |
|            | Average | 0.434769 | 0.404615 | 0.424358 |
|            | O       | 0.503949 | 0.478115 | 0.499927 |
|            | N       | 0.36558  | 0.331112 | 0.348783 |
|            | Average | 0.434765 | 0.404614 | 0.424355 |
| N-ECP-II   | N       | 0.34384  | 0.330685 | 0.349287 |
|            | O       | 0.490309 | 0.484031 | 0.505689 |
|            | Average | 0.417075 | 0.407358 | 0.427488 |
|            | O       | 0.490335 | 0.48403  | 0.505687 |
|            | N       | 0.343867 | 0.330686 | 0.349288 |
|            | Average | 0.417101 | 0.407358 | 0.427488 |
| O-ECP-II   | N       | 0.335833 | 0.32531  | 0.340756 |
|            | O       | 0.496051 | 0.489354 | 0.511391 |
|            | Average | 0.415942 | 0.407332 | 0.426074 |
|            | O       | 0.496003 | 0.489353 | 0.51139  |
|            | N       | 0.335776 | 0.32531  | 0.340756 |
|            | Average | 0.41589  | 0.407332 | 0.426073 |
| S-ECP-II   | N       | 0.325973 | 0.317104 | 0.330158 |
|            | O       | 0.495775 | 0.487557 | 0.511532 |
|            | Average | 0.410874 | 0.402331 | 0.420845 |
|            | O       | 0.495775 | 0.487557 | 0.511532 |
|            | N       | 0.325973 | 0.317104 | 0.330158 |
|            | Average | 0.410874 | 0.402331 | 0.420845 |



**Optimized coordinates:**

**Part-I diradicals**

**B3LYP/6-311++G(d,p)**

Boron(Set A)

|   |               |               |               |
|---|---------------|---------------|---------------|
| C | -2.9459540000 | 3.7236140000  | 0.1950610000  |
| C | -3.7947870000 | 2.6272930000  | 0.1193810000  |
| C | -3.2728360000 | 1.3219510000  | 0.0490010000  |
| C | -1.8851180000 | 1.1369940000  | 0.0224260000  |
| C | -1.0369600000 | 2.2745430000  | 0.1161830000  |
| C | -1.5545060000 | 3.5575960000  | 0.2022600000  |
| H | -3.3677690000 | 4.7207240000  | 0.2586230000  |
| H | -0.9057420000 | 4.4241790000  | 0.2690150000  |
| C | 0.4842250000  | 0.4494690000  | -0.0577350000 |
| C | 1.7345140000  | -0.1542610000 | -0.1093420000 |
| C | 2.9043020000  | 0.6233670000  | -0.0024410000 |
| C | 2.7860970000  | 2.0102280000  | 0.1429010000  |
| C | 1.5340970000  | 2.6341620000  | 0.1862070000  |
| C | 0.3895980000  | 1.8573810000  | 0.0911480000  |
| H | 1.8255910000  | -1.2267110000 | -0.2288750000 |
| H | 3.6870280000  | 2.6050050000  | 0.2208460000  |
| H | 1.4805410000  | 3.7122300000  | 0.2938560000  |
| C | 4.2436980000  | -0.0153140000 | -0.0461340000 |
| N | 4.2809340000  | -1.3385410000 | -0.2049410000 |
| N | 6.5184770000  | 0.1707790000  | 0.0324190000  |
| C | 6.7116830000  | -1.1957950000 | -0.1326000000 |
| N | 5.3059250000  | 0.7829270000  | 0.0767500000  |
| N | 5.5183110000  | -1.8993690000 | -0.2422540000 |
| O | 7.8101060000  | -1.7204950000 | -0.1747620000 |
| C | 7.6672890000  | 1.0607650000  | 0.1644500000  |
| H | 7.5995170000  | 1.5970680000  | 1.1126630000  |
| H | 8.5725970000  | 0.4614390000  | 0.1336190000  |

|   |              |              |              |
|---|--------------|--------------|--------------|
| H | 7.663380000  | 1.781481000  | -0.655633000 |
| C | 5.537145000  | -3.347547000 | -0.421527000 |
| H | 5.066622000  | -3.601153000 | -1.373515000 |
| H | 6.570421000  | -3.682124000 | -0.412144000 |
| H | 4.978606000  | -3.817155000 | 0.390067000  |
| H | -4.868151000 | 2.767771000  | 0.124674000  |
| C | -4.216421000 | 0.173699000  | 0.031640000  |
| N | -5.367433000 | 0.352791000  | -0.617930000 |
| N | -4.726779000 | -1.962360000 | 0.641631000  |
| C | -5.969125000 | -1.921948000 | 0.019378000  |
| C | -7.481088000 | -0.495735000 | -1.312635000 |
| H | -7.974491000 | 0.396874000  | -0.925134000 |
| H | -7.271550000 | -0.355522000 | -2.375344000 |
| H | -8.109340000 | -1.369837000 | -1.167759000 |
| C | -4.313926000 | -3.156738000 | 1.371798000  |
| H | -3.323050000 | -3.455353000 | 1.028006000  |
| H | -4.270872000 | -2.937680000 | 2.441240000  |
| H | -5.037269000 | -3.944499000 | 1.181976000  |
| N | -3.848390000 | -0.923999000 | 0.690227000  |
| N | -6.230030000 | -0.700012000 | -0.590138000 |
| O | -6.748863000 | -2.857333000 | 0.011987000  |
| B | -0.963882000 | -0.116640000 | -0.170582000 |
| H | -1.275270000 | -1.228762000 | -0.437923000 |

Carbon (Set A)

|   |              |             |              |
|---|--------------|-------------|--------------|
| C | -2.987783000 | 3.738832000 | -0.000344000 |
| C | -3.784924000 | 2.598625000 | -0.000280000 |
| C | -3.225484000 | 1.306926000 | -0.000220000 |
| C | -1.827049000 | 1.196659000 | -0.000208000 |
| C | -1.028147000 | 2.362286000 | -0.000233000 |

|   |               |               |               |
|---|---------------|---------------|---------------|
| C | -1.5991480000 | 3.6329000000  | -0.0003130000 |
| H | -3.4574160000 | 4.7159720000  | -0.0004100000 |
| H | -0.9784930000 | 4.5220320000  | -0.0003420000 |
| C | 0.4615220000  | 0.5691250000  | -0.0000120000 |
| C | 1.6887910000  | -0.0740270000 | 0.0001160000  |
| C | 2.8671000000  | 0.6900480000  | 0.0001380000  |
| C | 2.7835670000  | 2.0927830000  | 0.0000200000  |
| C | 1.5516160000  | 2.7374800000  | -0.0001120000 |
| C | 0.3844480000  | 1.9721860000  | -0.0001220000 |
| H | 1.7567000000  | -1.1546990000 | 0.0002060000  |
| H | 3.6984490000  | 2.6701310000  | 0.0000350000  |
| H | 1.5106610000  | 3.8211970000  | -0.0001950000 |
| C | 4.1921750000  | 0.0203120000  | 0.0002840000  |
| N | 4.2011640000  | -1.3139870000 | 0.0004780000  |
| N | 6.4722860000  | 0.1629670000  | 0.0004430000  |
| C | 6.6357980000  | -1.2167300000 | 0.0001230000  |
| N | 5.2729320000  | 0.8027350000  | 0.0002200000  |
| N | 5.4271020000  | -1.9018780000 | 0.0005800000  |
| O | 7.7229140000  | -1.7671440000 | -0.0003490000 |
| C | 7.6404000000  | 1.0373640000  | -0.0002450000 |
| H | 7.6160490000  | 1.6726920000  | 0.8871010000  |
| H | 8.5334050000  | 0.4190750000  | 0.0034500000  |
| H | 7.6198470000  | 1.6670390000  | -0.8917760000 |
| C | 5.4144110000  | -3.3607510000 | 0.0003000000  |
| H | 4.8937080000  | -3.7175140000 | -0.8904400000 |
| H | 6.4415100000  | -3.7140720000 | 0.0025480000  |
| H | 4.8896250000  | -3.7175010000 | 0.8886020000  |
| H | -4.8618700000 | 2.6946760000  | -0.0002810000 |
| C | -4.1410450000 | 0.1342300000  | -0.0001500000 |
| N | -5.4528160000 | 0.3976900000  | 0.0005830000  |
| N | -4.4751360000 | -2.1267570000 | -0.0007690000 |

|   |               |               |               |
|---|---------------|---------------|---------------|
| C | -5.8578120000 | -2.0040740000 | 0.0000400000  |
| C | -7.7048850000 | -0.3659850000 | 0.0015710000  |
| H | -7.9453690000 | 0.2175460000  | 0.8921870000  |
| H | -7.9457660000 | 0.2207030000  | -0.8868340000 |
| H | -8.2622030000 | -1.2982140000 | 0.0001080000  |
| C | -3.8593100000 | -3.4493260000 | -0.0013900000 |
| H | -3.2360510000 | -3.5583740000 | -0.8910700000 |
| H | -3.2364030000 | -3.5594860000 | 0.8884120000  |
| H | -4.6481300000 | -4.1960550000 | -0.0019800000 |
| N | -3.6015380000 | -1.0829650000 | -0.0008520000 |
| N | -6.2792520000 | -0.6790730000 | 0.0005440000  |
| O | -6.6206870000 | -2.9534810000 | 0.0002510000  |
| C | -0.9275670000 | -0.0240950000 | -0.0001090000 |
| H | -1.1095800000 | -0.6599540000 | -0.8715440000 |
| H | -1.1097380000 | -0.6599550000 | 0.8712960000  |

Nitrogen (Set A)

|   |               |               |               |
|---|---------------|---------------|---------------|
| C | 3.1246850000  | 3.8024870000  | -0.0000450000 |
| C | 3.8543410000  | 2.6104270000  | -0.0001860000 |
| C | 3.2307800000  | 1.3553720000  | -0.0003260000 |
| C | 1.8224020000  | 1.3516930000  | -0.0003300000 |
| C | 1.0713350000  | 2.5607250000  | -0.0001550000 |
| C | 1.7327540000  | 3.7886690000  | -0.0000180000 |
| H | 3.6557430000  | 4.7469880000  | 0.0000530000  |
| H | 1.1729760000  | 4.7173580000  | 0.0001120000  |
| C | -0.3595510000 | 0.7629670000  | -0.0003030000 |
| C | -1.5543690000 | 0.0506910000  | -0.0003040000 |
| C | -2.7512830000 | 0.7725990000  | -0.0001190000 |
| C | -2.7297760000 | 2.1846120000  | 0.0000470000  |
| C | -1.5324710000 | 2.8845350000  | 0.0000400000  |
| C | -0.3245780000 | 2.1794080000  | -0.0001260000 |
| H | -1.5724670000 | -1.0310770000 | -0.0004320000 |

|   |               |               |               |
|---|---------------|---------------|---------------|
| H | -3.6700790000 | 2.7181060000  | 0.0001910000  |
| H | -1.5400260000 | 3.9688490000  | 0.0001660000  |
| C | -4.0486740000 | 0.0485580000  | -0.0000740000 |
| N | -3.9996410000 | -1.2867290000 | -0.0003710000 |
| N | -6.3319060000 | 0.0984670000  | 0.0006250000  |
| C | -6.4323300000 | -1.2827160000 | 0.0001160000  |
| N | -5.1588480000 | 0.7891800000  | 0.0003400000  |
| N | -5.2037700000 | -1.9225710000 | -0.0005420000 |
| O | -7.4961230000 | -1.8772830000 | 0.0005040000  |
| C | -7.5602270000 | 0.8876570000  | 0.0010350000  |
| H | -8.1552450000 | 0.6635810000  | -0.8861530000 |
| H | -8.1572880000 | 0.6591430000  | 0.8856680000  |
| H | -7.2637340000 | 1.9330800000  | 0.0039190000  |
| C | -5.1784250000 | -3.3821290000 | -0.0004050000 |
| H | -5.6805900000 | -3.7704840000 | 0.8875470000  |
| H | -5.6881790000 | -3.7704560000 | -0.8839570000 |
| H | -4.1334280000 | -3.6801140000 | -0.0047610000 |
| H | 4.9356220000  | 2.6432370000  | -0.0001780000 |
| C | 4.0324970000  | 0.1142250000  | -0.0003820000 |
| N | 5.3637590000  | 0.2491400000  | 0.0001620000  |
| N | 4.1488470000  | -2.1745050000 | -0.0008980000 |
| C | 5.5362850000  | -2.1814250000 | 0.0002700000  |
| C | 7.5312800000  | -0.7264360000 | 0.0017240000  |
| H | 7.8257610000  | -0.1599000000 | -0.8833990000 |
| H | 7.8261850000  | -0.1739380000 | 0.8956760000  |
| H | 7.9969530000  | -1.7075970000 | -0.0057600000 |
| C | 3.4124730000  | -3.4331620000 | -0.0009400000 |
| H | 2.7846200000  | -3.4875470000 | 0.8909910000  |
| H | 2.7822390000  | -3.4857510000 | -0.8912610000 |
| H | 4.1287400000  | -4.2497300000 | -0.0026260000 |
| N | 3.3786970000  | -1.0501490000 | -0.0009770000 |

|   |              |               |               |
|---|--------------|---------------|---------------|
| N | 6.0816460000 | -0.9014050000 | -0.0000960000 |
| O | 6.2059540000 | -3.1986310000 | 0.0011260000  |
| N | 0.9429770000 | 0.2911400000  | -0.0004280000 |
| H | 1.2583300000 | -0.6669720000 | -0.0006590000 |

Oxygen (Set A):

|   |               |               |               |
|---|---------------|---------------|---------------|
| C | 3.1576620000  | 3.7902630000  | -0.0001360000 |
| C | 3.8442440000  | 2.5742960000  | -0.0000490000 |
| C | 3.1854620000  | 1.3339000000  | 0.0000550000  |
| C | 1.7855870000  | 1.3947060000  | 0.0000460000  |
| C | 1.0765870000  | 2.6153330000  | -0.0000480000 |
| C | 1.7674980000  | 3.8269700000  | -0.0001370000 |
| H | 3.7230130000  | 4.7147220000  | -0.0002050000 |
| H | 1.2347460000  | 4.7708130000  | -0.0002090000 |
| C | -0.3482370000 | 0.8516340000  | 0.0000760000  |
| C | -1.5094760000 | 0.1023020000  | 0.0001250000  |
| C | -2.7214090000 | 0.8047430000  | 0.0000670000  |
| C | -2.7243080000 | 2.2155590000  | -0.0000420000 |
| C | -1.5418560000 | 2.9428850000  | -0.0000870000 |
| C | -0.3254050000 | 2.2533690000  | -0.0000250000 |
| H | -1.4883930000 | -0.9781550000 | 0.0002040000  |
| H | -3.6751790000 | 2.7302720000  | -0.0000850000 |
| H | -1.5693750000 | 4.0264350000  | -0.0001670000 |
| C | -4.0053960000 | 0.0570690000  | 0.0001150000  |
| N | -3.9291530000 | -1.2758040000 | 0.0004620000  |
| N | -6.2875720000 | 0.0641830000  | -0.0000240000 |
| C | -6.3604320000 | -1.3195080000 | 0.0000660000  |
| N | -5.1285260000 | 0.7774170000  | -0.0002250000 |
| N | -5.1193220000 | -1.9356080000 | 0.0002390000  |
| O | -7.4120990000 | -1.9340060000 | 0.0002010000  |
| C | -7.5315360000 | 0.8286360000  | -0.0004870000 |

|   |               |               |               |
|---|---------------|---------------|---------------|
| H | -8.1216040000 | 0.5919650000  | -0.8876650000 |
| H | -8.1240260000 | 0.5887690000  | 0.8841710000  |
| H | -7.2562500000 | 1.8798200000  | 0.0017150000  |
| C | -5.0643410000 | -3.3947450000 | 0.0008540000  |
| H | -5.5603210000 | -3.7923760000 | 0.8880610000  |
| H | -5.5644380000 | -3.7930800000 | -0.8836750000 |
| H | -4.0135530000 | -3.6714580000 | -0.0013990000 |
| O | 0.9230190000  | 0.3281500000  | 0.0001190000  |
| H | 4.9255980000  | 2.5695150000  | -0.0000500000 |
| C | 3.9745400000  | 0.0774300000  | 0.0001450000  |
| N | 5.3053310000  | 0.2157060000  | -0.0000170000 |
| N | 4.0812290000  | -2.1995310000 | -0.0000210000 |
| C | 5.4692200000  | -2.2149510000 | -0.0000220000 |
| C | 7.4704010000  | -0.7682040000 | -0.0004280000 |
| H | 7.7683630000  | -0.2105210000 | -0.8903180000 |
| H | 7.7686160000  | -0.2097400000 | 0.8888800000  |
| H | 7.9324390000  | -1.7511800000 | -0.0000790000 |
| C | 3.3343930000  | -3.4535630000 | -0.0001950000 |
| H | 2.7027710000  | -3.4965180000 | 0.8888680000  |
| H | 2.7027530000  | -3.4962690000 | -0.8892570000 |
| H | 4.0432400000  | -4.2765790000 | -0.0003150000 |
| N | 3.3146980000  | -1.0765230000 | 0.0000850000  |
| N | 6.0212160000  | -0.9383040000 | -0.0000940000 |
| O | 6.1349690000  | -3.2348860000 | -0.0004040000 |

Sulphur (Set A):

|   |               |              |               |
|---|---------------|--------------|---------------|
| C | -2.8632900000 | 3.7214190000 | -0.0000650000 |
| C | -3.7288290000 | 2.6281110000 | -0.0000430000 |
| C | -3.2520640000 | 1.3116840000 | -0.0000430000 |
| C | -1.8550760000 | 1.1184860000 | -0.0000720000 |

|   |               |               |               |
|---|---------------|---------------|---------------|
| C | -0.9731180000 | 2.2279740000  | -0.0000830000 |
| C | -1.4894120000 | 3.5278530000  | -0.0000800000 |
| H | -3.2708600000 | 4.7254980000  | -0.0000640000 |
| H | -0.8168150000 | 4.3780200000  | -0.0000880000 |
| C | 0.5725210000  | 0.4328710000  | -0.0001110000 |
| C | 1.8269350000  | -0.1709350000 | -0.0001190000 |
| C | 2.9672190000  | 0.6356890000  | -0.0000950000 |
| C | 2.8278370000  | 2.0384900000  | -0.0000620000 |
| C | 1.5754050000  | 2.6294790000  | -0.0000640000 |
| C | 0.4224700000  | 1.8316710000  | -0.0000890000 |
| H | 1.9316240000  | -1.2477390000 | -0.0001410000 |
| H | 3.7183820000  | 2.6519430000  | -0.0000410000 |
| H | 1.4933860000  | 3.7106300000  | -0.0000450000 |
| C | 4.3178500000  | 0.0171520000  | -0.0001050000 |
| N | 4.3741660000  | -1.3169830000 | -0.0007090000 |
| N | 6.5883670000  | 0.2504350000  | 0.0001990000  |
| C | 6.7980280000  | -1.1190420000 | -0.0001030000 |
| N | 5.3640260000  | 0.8451500000  | 0.0004630000  |
| N | 5.6239700000  | -1.8553300000 | -0.0004490000 |
| O | 7.9054860000  | -1.6264070000 | -0.0001580000 |
| C | 7.7508130000  | 1.1339980000  | 0.0009670000  |
| H | 8.3609670000  | 0.9564840000  | 0.8883470000  |
| H | 8.3642070000  | 0.9534180000  | -0.8835050000 |
| H | 7.3734340000  | 2.1530150000  | -0.0014050000 |
| C | 5.7144650000  | -3.3125600000 | -0.0013490000 |
| H | 6.2474730000  | -3.6584920000 | -0.8887610000 |
| H | 6.2520240000  | -3.6590940000 | 0.8830260000  |
| H | 4.6963750000  | -3.6924320000 | 0.0010530000  |
| H | -4.7991900000 | 2.7829930000  | -0.0000230000 |
| C | -4.2199850000 | 0.1906040000  | 0.0000030000  |
| N | -5.5214380000 | 0.5028460000  | 0.0000380000  |



|   |               |               |               |
|---|---------------|---------------|---------------|
| N | -4.6209290000 | -2.0583370000 | 0.0002250000  |
| C | -5.9988710000 | -1.8891270000 | 0.0000490000  |
| C | -7.7950680000 | -0.1945380000 | 0.0003510000  |
| H | -8.0181140000 | 0.3969110000  | 0.8902680000  |
| H | -8.0181940000 | 0.3976490000  | -0.8890460000 |
| H | -8.3797960000 | -1.1098260000 | 0.0000130000  |
| C | -4.0431810000 | -3.3985280000 | 0.0005980000  |
| H | -3.4231060000 | -3.5245390000 | -0.8888000000 |
| H | -3.4233090000 | -3.5241480000 | 0.8901950000  |
| H | -4.8540570000 | -4.1212030000 | 0.0006620000  |
| N | -3.7219190000 | -1.0397420000 | 0.0001410000  |
| N | -6.3792230000 | -0.5497430000 | 0.0000850000  |
| O | -6.7921780000 | -2.8126320000 | 0.0005740000  |
| S | -0.9761200000 | -0.4168350000 | -0.0001150000 |

Boron (Set B):

|   |               |               |               |
|---|---------------|---------------|---------------|
| C | -3.0008290000 | -1.6072400000 | 0.0000020000  |
| C | -3.5047550000 | -0.3020230000 | -0.0000120000 |
| C | -2.6005710000 | 0.7788460000  | -0.0000760000 |
| C | -1.2308520000 | 0.5483200000  | -0.0001090000 |
| C | -0.7423930000 | -0.7869280000 | -0.0000690000 |
| C | -1.6235400000 | -1.8574260000 | -0.0000170000 |
| H | -3.6981690000 | -2.4349750000 | 0.0000500000  |
| H | -2.9898410000 | 1.7892930000  | -0.0001010000 |
| H | -1.2686160000 | -2.8825020000 | 0.0000200000  |
| C | 1.2308510000  | 0.5483210000  | -0.0000680000 |
| C | 2.6005710000  | 0.7788470000  | -0.0000020000 |
| C | 3.5047550000  | -0.3020210000 | 0.0000720000  |
| C | 3.0008290000  | -1.6072390000 | 0.0000710000  |
| C | 1.6235410000  | -1.8574260000 | 0.0000130000  |
| C | 0.7423930000  | -0.7869270000 | -0.0000500000 |

|   |               |               |               |
|---|---------------|---------------|---------------|
| H | 2.9898400000  | 1.7892940000  | -0.0000190000 |
| H | 3.6981700000  | -2.4349740000 | 0.0001310000  |
| H | 1.2686160000  | -2.8825010000 | 0.0000360000  |
| B | 0.0000000000  | 1.5066300000  | -0.0002020000 |
| H | -0.0000010000 | 2.6958750000  | -0.0000750000 |
| C | 4.9701920000  | -0.0613670000 | 0.0001430000  |
| N | 5.3732770000  | 1.2104920000  | 0.0003230000  |
| N | 7.1010270000  | -0.8803460000 | 0.0000880000  |
| C | 7.6611010000  | 0.3872960000  | 0.0000910000  |
| C | -4.9701920000 | -0.0613700000 | 0.0000360000  |
| N | -5.7641530000 | -1.1352100000 | 0.0001040000  |
| N | -6.7200540000 | 1.4042670000  | -0.0002440000 |
| C | -7.6611010000 | 0.3872980000  | -0.0000310000 |
| N | 5.7641520000  | -1.1352100000 | -0.0001040000 |
| N | 6.7200550000  | 1.4042670000  | 0.0000960000  |
| N | -7.1010270000 | -0.8803460000 | -0.0001470000 |
| N | -5.3732770000 | 1.2104920000  | -0.0002230000 |
| O | 8.8626080000  | 0.5873050000  | 0.0000150000  |
| O | -8.8626070000 | 0.5873070000  | 0.0001030000  |
| C | 7.9928570000  | -2.0364760000 | -0.0003600000 |
| H | 8.6284620000  | -2.0244320000 | -0.8875750000 |
| H | 8.6321940000  | -2.0219790000 | 0.8840850000  |
| H | 7.3627910000  | -2.9217920000 | 0.0021100000  |
| C | 7.1873150000  | 2.7877450000  | 0.0004630000  |
| H | 7.7923720000  | 2.9828090000  | 0.8876460000  |
| H | 7.7963380000  | 2.9817510000  | -0.8841910000 |
| H | 6.3035410000  | 3.4199540000  | -0.0018190000 |
| C | -7.9928590000 | -2.0364760000 | 0.0003000000  |
| H | -8.6283500000 | -2.0245250000 | 0.8875990000  |
| H | -8.6323080000 | -2.0218830000 | -0.8840600000 |
| H | -7.3627930000 | -2.9217920000 | -0.0023420000 |

|   |               |              |               |
|---|---------------|--------------|---------------|
| C | -7.1873140000 | 2.7877440000 | -0.0003320000 |
| H | -7.7944590000 | 2.9821850000 | -0.8862020000 |
| H | -7.7942500000 | 2.9823760000 | 0.8856390000  |
| H | -6.3035370000 | 3.4199540000 | -0.0005050000 |

Carbon (Set B)

|   |               |               |               |
|---|---------------|---------------|---------------|
| C | -3.0145500000 | -1.6975230000 | -0.0005690000 |
| C | -3.4692340000 | -0.3682160000 | -0.0003950000 |
| C | -2.5366310000 | 0.6822650000  | -0.0001450000 |
| C | -1.1828570000 | 0.3904900000  | -0.0001430000 |
| C | -0.7323150000 | -0.9443400000 | -0.0001940000 |
| C | -1.6553890000 | -1.9912160000 | -0.0004440000 |
| H | -3.7423700000 | -2.4978320000 | -0.0008260000 |
| H | -2.8902510000 | 1.7056040000  | -0.0000600000 |
| H | -1.3268760000 | -3.0246820000 | -0.0004400000 |
| C | 1.1828570000  | 0.3904900000  | 0.0000800000  |
| C | 2.5366310000  | 0.6822650000  | 0.0000600000  |
| C | 3.4692340000  | -0.3682160000 | 0.0003730000  |
| C | 3.0145510000  | -1.6975220000 | 0.0006280000  |
| C | 1.6553900000  | -1.9912160000 | 0.0005240000  |
| C | 0.7323150000  | -0.9443400000 | 0.0002130000  |
| H | 2.8902510000  | 1.7056040000  | -0.0000910000 |
| H | 3.7423700000  | -2.4978320000 | 0.0009320000  |
| H | 1.3268760000  | -3.0246820000 | 0.0005840000  |
| C | 4.9252490000  | -0.0749470000 | 0.0004130000  |
| N | 5.2851810000  | 1.2109520000  | 0.0019740000  |
| N | 7.0840730000  | -0.8193490000 | -0.0012280000 |
| C | 7.6005090000  | 0.4661500000  | -0.0001510000 |
| C | -4.9252490000 | -0.0749480000 | -0.0004620000 |
| N | -5.7566040000 | -1.1197770000 | 0.0013080000  |
| N | -6.6253370000 | 1.4500340000  | -0.0014840000 |

|   |               |               |               |
|---|---------------|---------------|---------------|
| C | -7.6005090000 | 0.4661500000  | 0.0003470000  |
| N | 5.7566040000  | -1.1197770000 | -0.0014360000 |
| N | 6.6253370000  | 1.4500340000  | 0.0012940000  |
| N | -7.0840730000 | -0.8193490000 | 0.0011830000  |
| N | -5.2851800000 | 1.2109520000  | -0.0020110000 |
| O | 8.7947680000  | 0.7076660000  | -0.0001620000 |
| O | -8.7947670000 | 0.7076660000  | 0.0003780000  |
| C | 8.0144060000  | -1.9446090000 | -0.0032690000 |
| H | 8.6487760000  | -1.9103960000 | -0.8908110000 |
| H | 8.6533750000  | -1.9095260000 | 0.8808810000  |
| H | 7.4145210000  | -2.8506740000 | -0.0013550000 |
| C | 7.0455680000  | 2.8481820000  | 0.0032250000  |
| H | 7.6438630000  | 3.0631280000  | 0.8904660000  |
| H | 7.6475560000  | 3.0642360000  | -0.8811940000 |
| H | 6.1409190000  | 3.4502270000  | 0.0018000000  |
| C | -8.0144060000 | -1.9446090000 | 0.0032470000  |
| H | -8.6485500000 | -1.9105680000 | 0.8909590000  |
| H | -8.6536000000 | -1.9093540000 | -0.8807320000 |
| H | -7.4145220000 | -2.8506740000 | 0.0010060000  |
| C | -7.0455690000 | 2.8481810000  | -0.0031470000 |
| H | -7.6462070000 | 3.0624900000  | -0.8889330000 |
| H | -7.6452150000 | 3.0648770000  | 0.8827290000  |
| H | -6.1409170000 | 3.4502240000  | -0.0044710000 |
| C | 0.0000000000  | 1.3361040000  | -0.0000610000 |
| H | 0.0000830000  | 1.9898200000  | -0.8797550000 |
| H | -0.0000830000 | 1.9898750000  | 0.8795930000  |

Nitrogen (Set B):

|   |               |               |               |
|---|---------------|---------------|---------------|
| C | -3.0423020000 | -1.7778420000 | -0.0001450000 |
| C | -3.4361810000 | -0.4215980000 | -0.0001530000 |
| C | -2.4729000000 | 0.5911990000  | -0.0000940000 |
| C | -1.1321900000 | 0.2212280000  | -0.0000730000 |

|   |               |               |               |
|---|---------------|---------------|---------------|
| C | -0.7227190000 | -1.1370390000 | -0.0001050000 |
| C | -1.7028350000 | -2.1356900000 | -0.0001240000 |
| H | -3.8081470000 | -2.5408760000 | -0.0001740000 |
| H | -2.7780060000 | 1.6294460000  | -0.0000790000 |
| H | -1.4227340000 | -3.1831620000 | -0.0001370000 |
| C | 1.1321900000  | 0.2212270000  | -0.0000770000 |
| C | 2.4729000000  | 0.5911980000  | -0.0001000000 |
| C | 3.4361810000  | -0.4215990000 | -0.0001810000 |
| C | 3.0423030000  | -1.7778440000 | -0.0001960000 |
| C | 1.7028350000  | -2.1356920000 | -0.0001640000 |
| C | 0.7227210000  | -1.1370400000 | -0.0001130000 |
| H | 2.7780110000  | 1.6294440000  | -0.0000680000 |
| H | 3.8081490000  | -2.5408770000 | -0.0002420000 |
| H | 1.4227330000  | -3.1831640000 | -0.0001830000 |
| C | 4.8787540000  | -0.0660520000 | -0.0002240000 |
| N | 5.1841300000  | 1.2346440000  | 0.0001560000  |
| N | 7.0670670000  | -0.7181610000 | 0.0000440000  |
| C | 7.5290890000  | 0.5874840000  | -0.0001140000 |
| C | -4.8787540000 | -0.0660530000 | -0.0002260000 |
| N | -5.7533070000 | -1.0738900000 | 0.0004480000  |
| N | -6.5134000000 | 1.5296560000  | -0.0001940000 |
| C | -7.5290900000 | 0.5874780000  | -0.0000810000 |
| N | 5.7533100000  | -1.0738930000 | -0.0002300000 |
| N | 6.5134010000  | 1.5296560000  | 0.0002820000  |
| N | -7.0670680000 | -0.7181600000 | 0.0002280000  |
| N | -5.1841320000 | 1.2346480000  | -0.0006340000 |
| O | 8.7121290000  | 0.8794150000  | 0.0003090000  |
| O | -8.7121300000 | 0.8794140000  | 0.0002310000  |
| C | 8.0431630000  | -1.8040090000 | -0.0001430000 |
| H | 8.6763360000  | -1.7445160000 | -0.8872130000 |
| H | 8.6793650000  | -1.7418850000 | 0.8845350000  |

|   |               |               |               |
|---|---------------|---------------|---------------|
| H | 7.4809700000  | -2.7339450000 | 0.0021300000  |
| C | 6.8755150000  | 2.9437910000  | 0.0007030000  |
| H | 7.4664230000  | 3.1836400000  | 0.8865150000  |
| H | 7.4662350000  | 3.1842060000  | -0.8850830000 |
| H | 5.9469150000  | 3.5082000000  | 0.0009850000  |
| C | -8.0431590000 | -1.8040130000 | 0.0012180000  |
| H | -8.6757630000 | -1.7444270000 | 0.8886940000  |
| H | -8.6799280000 | -1.7419860000 | -0.8830520000 |
| H | -7.4809640000 | -2.7339470000 | -0.0012940000 |
| C | -6.8755210000 | 2.9437900000  | -0.0008130000 |
| H | -7.4634690000 | 3.1844040000  | -0.8884180000 |
| H | -7.4691970000 | 3.1834330000  | 0.8831700000  |
| H | -5.9469290000 | 3.5082040000  | 0.0023900000  |
| N | 0.0000000000  | 1.0215060000  | 0.0000100000  |
| H | 0.0000140000  | 2.0276010000  | -0.0003240000 |

Oxygen (Set B):

|   |               |               |               |
|---|---------------|---------------|---------------|
| C | -3.0563750000 | -1.8302000000 | -0.0001000000 |
| C | -3.4080210000 | -0.4640420000 | -0.0001360000 |
| C | -2.4119430000 | 0.5211440000  | -0.0001620000 |
| C | -1.0991950000 | 0.0904490000  | -0.0001500000 |
| C | -0.7236730000 | -1.2642770000 | -0.0001220000 |
| C | -1.7291630000 | -2.2362570000 | -0.0000960000 |
| H | -3.8473500000 | -2.5673380000 | -0.0000790000 |
| H | -2.6648940000 | 1.5718660000  | -0.0001880000 |
| H | -1.4826590000 | -3.2916800000 | -0.0000730000 |
| C | 1.0992130000  | 0.0904410000  | -0.0001330000 |
| C | 2.4119630000  | 0.5211120000  | -0.0001190000 |
| C | 3.4080300000  | -0.4640930000 | -0.0000950000 |
| C | 3.0563690000  | -1.8302390000 | -0.0000860000 |
| C | 1.7291450000  | -2.2362770000 | -0.0000970000 |

|   |               |               |               |
|---|---------------|---------------|---------------|
| C | 0.7236730000  | -1.2642880000 | -0.0001170000 |
| H | 2.6649520000  | 1.5718250000  | -0.0001250000 |
| H | 3.8473220000  | -2.5674000000 | -0.0000670000 |
| H | 1.4826340000  | -3.2916980000 | -0.0000850000 |
| C | 4.8387310000  | -0.0637120000 | -0.0000590000 |
| N | 5.1005440000  | 1.2452780000  | 0.0002330000  |
| N | 7.0449300000  | -0.6463610000 | 0.0000720000  |
| C | 7.4639560000  | 0.6742230000  | 0.0002310000  |
| C | -4.8387180000 | -0.0636600000 | -0.0001490000 |
| N | -5.7434940000 | -1.0442320000 | 0.0001990000  |
| N | -6.4187020000 | 1.5836420000  | -0.0003290000 |
| C | -7.4639400000 | 0.6742830000  | 0.0000810000  |
| N | 5.7434970000  | -1.0442740000 | -0.0002230000 |
| N | 6.4185790000  | 1.5836490000  | 0.0001930000  |
| N | -7.0448330000 | -0.6464290000 | 0.0001240000  |
| N | -5.1005290000 | 1.2453170000  | -0.0004460000 |
| O | 8.6366770000  | 1.0035330000  | 0.0003640000  |
| O | -8.6367210000 | 1.0033810000  | 0.0002590000  |
| C | 8.0558090000  | -1.6996560000 | -0.0002680000 |
| H | 8.6868920000  | -1.6191730000 | -0.8871200000 |
| H | 8.6894660000  | -1.6170550000 | 0.8845130000  |
| H | 7.5246440000  | -2.6476050000 | 0.0015720000  |
| C | 6.7332520000  | 3.0092760000  | 0.0006770000  |
| H | 7.3134760000  | 3.2689430000  | 0.8878880000  |
| H | 7.3177150000  | 3.2684160000  | -0.8838560000 |
| H | 5.7862950000  | 3.5421860000  | -0.0016650000 |
| C | -8.0557540000 | -1.6996660000 | 0.0007710000  |
| H | -8.6865870000 | -1.6191440000 | 0.8877990000  |
| H | -8.6896710000 | -1.6170480000 | -0.8838220000 |
| H | -7.5246470000 | -2.6476500000 | -0.0012100000 |
| C | -6.7333060000 | 3.0092970000  | -0.0005550000 |

|   |               |              |               |
|---|---------------|--------------|---------------|
| H | -7.3158030000 | 3.2685430000 | -0.8863750000 |
| H | -7.3154610000 | 3.2689010000 | 0.8853840000  |
| H | -5.7863140000 | 3.5421440000 | -0.0008480000 |
| O | 0.0000110000  | 0.9185470000 | -0.0001610000 |

Sulphur (Set B):

|   |               |               |               |
|---|---------------|---------------|---------------|
| C | -2.9829870000 | -1.6730050000 | -0.0000930000 |
| C | -3.5027650000 | -0.3630730000 | -0.0001690000 |
| C | -2.6292120000 | 0.7271750000  | -0.0002040000 |
| C | -1.2583140000 | 0.4918980000  | -0.0001650000 |
| C | -0.7247630000 | -0.8147510000 | -0.0000870000 |
| C | -1.6164500000 | -1.8968320000 | -0.0000510000 |
| H | -3.6709460000 | -2.5072450000 | -0.0000660000 |
| H | -3.0269990000 | 1.7330250000  | -0.0002600000 |
| H | -1.2386000000 | -2.9130190000 | 0.0000080000  |
| C | 1.2583140000  | 0.4918970000  | -0.0001020000 |
| C | 2.6292120000  | 0.7271740000  | -0.0000790000 |
| C | 3.5027650000  | -0.3630740000 | -0.0000030000 |
| C | 2.9829860000  | -1.6730070000 | 0.0000500000  |
| C | 1.6164490000  | -1.8968330000 | 0.0000240000  |
| C | 0.7247620000  | -0.8147510000 | -0.0000520000 |
| H | 3.0270000000  | 1.7330230000  | -0.0001220000 |
| H | 3.6709450000  | -2.5072450000 | 0.0001100000  |
| H | 1.2385990000  | -2.9130200000 | 0.0000660000  |
| C | 4.9710950000  | -0.1385820000 | 0.0000220000  |
| N | 5.3899260000  | 1.1290830000  | 0.0001950000  |
| N | 7.0900490000  | -0.9846550000 | 0.0002070000  |
| C | 7.6663830000  | 0.2752820000  | 0.0001380000  |
| C | -4.9710950000 | -0.1385810000 | -0.0002030000 |
| N | -5.7497970000 | -1.2217160000 | -0.0000730000 |
| N | -6.7391980000 | 1.3050310000  | -0.0001750000 |



|   |               |               |               |
|---|---------------|---------------|---------------|
| C | -7.6663840000 | 0.2752800000  | 0.0000240000  |
| N | 5.7497990000  | -1.2217150000 | -0.0000540000 |
| N | 6.7392000000  | 1.3050310000  | 0.0000650000  |
| N | -7.0900500000 | -0.9846540000 | -0.0001710000 |
| N | -5.3899290000 | 1.1290830000  | -0.0002840000 |
| O | 8.8703450000  | 0.4598910000  | 0.0001950000  |
| O | -8.8703450000 | 0.4598920000  | 0.0003880000  |
| C | 7.9659410000  | -2.1526800000 | -0.0000640000 |
| H | 8.6016300000  | -2.1495320000 | -0.8872790000 |
| H | 8.6054880000  | -2.1467760000 | 0.8843090000  |
| H | 7.3239890000  | -3.0293720000 | 0.0026080000  |
| C | 7.2248410000  | 2.6818810000  | 0.0004330000  |
| H | 7.8324660000  | 2.8689400000  | 0.8875690000  |
| H | 7.8365110000  | 2.8677960000  | -0.8841160000 |
| H | 6.3498620000  | 3.3261580000  | -0.0019080000 |
| C | -7.9659380000 | -2.1526820000 | 0.0003590000  |
| H | -8.6013720000 | -2.1495390000 | 0.8877580000  |
| H | -8.6057380000 | -2.1467780000 | -0.8838300000 |
| H | -7.3239850000 | -3.0293720000 | -0.0024960000 |
| C | -7.2248440000 | 2.6818810000  | -0.0000620000 |
| H | -7.8347000000 | 2.8683580000  | -0.8857650000 |
| H | -7.8342870000 | 2.8683710000  | 0.8859250000  |
| H | -6.3498630000 | 3.3261600000  | -0.0002690000 |
| S | 0.0000000000  | 1.7316050000  | -0.0001990000 |

**M06/6-311++G(d,p)**

**Boron (Set A):**

|          |                      |                     |                     |
|----------|----------------------|---------------------|---------------------|
| <b>C</b> | <b>-2.9328490000</b> | <b>3.7155010000</b> | <b>0.1936860000</b> |
| <b>C</b> | <b>-3.7836770000</b> | <b>2.6266360000</b> | <b>0.1246560000</b> |
| <b>C</b> | <b>-3.2691950000</b> | <b>1.3258250000</b> | <b>0.0568460000</b> |
| <b>C</b> | <b>-1.8888750000</b> | <b>1.1344660000</b> | <b>0.0272420000</b> |

|   |               |               |               |
|---|---------------|---------------|---------------|
| C | -1.0404540000 | 2.2616360000  | 0.1138290000  |
| C | -1.5483650000 | 3.5431730000  | 0.1970400000  |
| H | -3.3507080000 | 4.7159590000  | 0.2557360000  |
| H | -0.8903410000 | 4.4058650000  | 0.2594270000  |
| C | 0.4726570000  | 0.4436610000  | -0.0490040000 |
| C | 1.7182610000  | -0.1561170000 | -0.0981600000 |
| C | 2.8796760000  | 0.6226170000  | 0.0003850000  |
| C | 2.7612570000  | 2.0045460000  | 0.1348300000  |
| C | 1.5141400000  | 2.6242270000  | 0.1760480000  |
| C | 0.3771300000  | 1.8448950000  | 0.0891650000  |
| H | 1.8118270000  | -1.2320480000 | -0.2113710000 |
| H | 3.6658400000  | 2.5994460000  | 0.2058260000  |
| H | 1.4531230000  | 3.7047660000  | 0.2764600000  |
| C | 4.2135340000  | -0.0101880000 | -0.0426190000 |
| N | 4.2510490000  | -1.3324490000 | -0.1625760000 |
| N | 6.4749820000  | 0.1832460000  | -0.0001140000 |
| C | 6.6724040000  | -1.1827250000 | -0.1254030000 |
| N | 5.2705180000  | 0.7911080000  | 0.0416280000  |
| N | 5.4812610000  | -1.8862180000 | -0.2017780000 |
| O | 7.7635490000  | -1.7025140000 | -0.1632610000 |
| C | 7.6153460000  | 1.0734620000  | 0.0918660000  |
| H | 7.5638920000  | 1.6331110000  | 1.0293490000  |
| H | 8.5255820000  | 0.4783180000  | 0.0588850000  |
| H | 7.5957200000  | 1.7782630000  | -0.7435790000 |
| C | 5.5008300000  | -3.3295790000 | -0.3357840000 |
| H | 4.9950140000  | -3.6155730000 | -1.2616490000 |
| H | 6.5361440000  | -3.6636360000 | -0.3548510000 |
| H | 4.9743420000  | -3.7800870000 | 0.5095800000  |
| H | -4.8592170000 | 2.7692440000  | 0.1335760000  |
| C | -4.2032010000 | 0.1814660000  | 0.0416510000  |
| N | -5.3765100000 | 0.3679770000  | -0.5524490000 |
| N | -4.6497800000 | -1.9744400000 | 0.5769080000  |

|   |               |               |               |
|---|---------------|---------------|---------------|
| C | -5.9118470000 | -1.9343550000 | 0.0060440000  |
| C | -7.4922840000 | -0.4784830000 | -1.1820180000 |
| H | -7.9959290000 | 0.3722060000  | -0.7164360000 |
| H | -7.3325430000 | -0.2590040000 | -2.2412690000 |
| H | -8.0938490000 | -1.3786190000 | -1.0737710000 |
| C | -4.1766190000 | -3.1902360000 | 1.2092950000  |
| H | -3.1889960000 | -3.4330820000 | 0.8098520000  |
| H | -4.0950760000 | -3.0401120000 | 2.2897420000  |
| H | -4.8814940000 | -3.9918850000 | 0.9982350000  |
| N | -3.7967550000 | -0.9297100000 | 0.6424610000  |
| N | -6.2150430000 | -0.6924810000 | -0.5309670000 |
| O | -6.6674850000 | -2.8777340000 | -0.0171880000 |
| B | -0.9729920000 | -0.1202930000 | -0.1627970000 |
| H | -1.2821310000 | -1.2314880000 | -0.4355380000 |

**Carbon (Set A):**

|   |               |               |               |
|---|---------------|---------------|---------------|
| C | -2.9759240000 | 3.7268950000  | 0.0398620000  |
| C | -3.7690260000 | 2.5901920000  | 0.0295130000  |
| C | -3.2115920000 | 1.3053650000  | 0.0247330000  |
| C | -1.8198270000 | 1.1938290000  | 0.0301720000  |
| C | -1.0260280000 | 2.3541940000  | 0.0356500000  |
| C | -1.5929800000 | 3.6203140000  | 0.0418640000  |
| H | -3.4464420000 | 4.7051710000  | 0.0455600000  |
| H | -0.9671280000 | 4.5085270000  | 0.0472560000  |
| C | 0.4528460000  | 0.5688030000  | 0.0167800000  |
| C | 1.6749120000  | -0.0725620000 | 0.0054950000  |
| C | 2.8466040000  | 0.6892670000  | 0.0046630000  |
| C | 2.7661310000  | 2.0859620000  | 0.0161300000  |
| C | 1.5399180000  | 2.7293680000  | 0.0275610000  |
| C | 0.3789520000  | 1.9656530000  | 0.0276320000  |
| H | 1.7422840000  | -1.1560980000 | -0.0029440000 |
| H | 3.6856570000  | 2.6607490000  | 0.0155360000  |

|   |               |               |               |
|---|---------------|---------------|---------------|
| H | 1.4950810000  | 3.8150720000  | 0.0360870000  |
| C | 4.1642910000  | 0.0215740000  | -0.0087010000 |
| N | 4.1699340000  | -1.3074590000 | -0.0237980000 |
| N | 6.4309940000  | 0.1605230000  | -0.0174070000 |
| C | 6.5948110000  | -1.2147850000 | -0.0349040000 |
| N | 5.2417520000  | 0.7996090000  | -0.0048620000 |
| N | 5.3866600000  | -1.8923630000 | -0.0365900000 |
| O | 7.6728360000  | -1.7633600000 | -0.0471580000 |
| C | 7.5930210000  | 1.0270000000  | -0.0136750000 |
| H | 7.5733480000  | 1.6569440000  | 0.8794080000  |
| H | 8.4884410000  | 0.4088610000  | -0.0179390000 |
| H | 7.5726540000  | 1.6672110000  | -0.8995300000 |
| C | 5.3701850000  | -3.3415520000 | -0.0540180000 |
| H | 4.8403920000  | -3.6884800000 | -0.9450780000 |
| H | 6.3968300000  | -3.7018170000 | -0.0636870000 |
| H | 4.8495890000  | -3.7100160000 | 0.8338070000  |
| H | -4.8489330000 | 2.6839540000  | 0.0249490000  |
| C | -4.1175030000 | 0.1362940000  | 0.0110140000  |
| N | -5.4202780000 | 0.3888260000  | -0.1087300000 |
| N | -4.4365690000 | -2.1110710000 | 0.1024530000  |
| C | -5.8118340000 | -2.0036950000 | -0.0103160000 |
| C | -7.6460740000 | -0.3878080000 | -0.2422460000 |
| H | -7.9639210000 | 0.2374260000  | 0.5961400000  |
| H | -7.8175310000 | 0.1555910000  | -1.1749560000 |
| H | -8.2013940000 | -1.3234180000 | -0.2443850000 |
| C | -3.8194710000 | -3.4169020000 | 0.2228580000  |
| H | -3.1130110000 | -3.5622740000 | -0.5986940000 |
| H | -3.2787970000 | -3.4794590000 | 1.1711380000  |
| H | -4.5986160000 | -4.1755650000 | 0.1858690000  |
| N | -3.5756280000 | -1.0693930000 | 0.1201300000  |
| N | -6.2331170000 | -0.6866380000 | -0.1126850000 |
| O | -6.5628640000 | -2.9511540000 | -0.0192750000 |

|   |               |               |               |
|---|---------------|---------------|---------------|
| C | -0.9270430000 | -0.0181370000 | 0.0235860000  |
| H | -1.1161710000 | -0.6598190000 | -0.8458420000 |
| H | -1.1045810000 | -0.6562870000 | 0.8972750000  |

Nitrogen (Set A):

|   |               |               |               |
|---|---------------|---------------|---------------|
| C | 3.0986850000  | 3.7832270000  | 0.0001960000  |
| C | 3.8293690000  | 2.5980250000  | 0.0000210000  |
| C | 3.2145740000  | 1.3460160000  | -0.0001490000 |
| C | 1.8124490000  | 1.3327770000  | -0.0001330000 |
| C | 1.0632520000  | 2.5328750000  | 0.0000450000  |
| C | 1.7130220000  | 3.7603920000  | 0.0002110000  |
| H | 3.6262420000  | 4.7313210000  | 0.0003230000  |
| H | 1.1419640000  | 4.6847660000  | 0.0003520000  |
| C | -0.3586750000 | 0.7432910000  | -0.0001630000 |
| C | -1.5509590000 | 0.0367890000  | -0.0002170000 |
| C | -2.7394850000 | 0.7603810000  | -0.0000760000 |
| C | -2.7173080000 | 2.1661120000  | 0.0000960000  |
| C | -1.5237620000 | 2.8602090000  | 0.0001470000  |
| C | -0.3248250000 | 2.1520810000  | 0.0000240000  |
| H | -1.5728670000 | -1.0475910000 | -0.0003540000 |
| H | -3.6604630000 | 2.6996650000  | 0.0002030000  |
| H | -1.5228140000 | 3.9467390000  | 0.0002830000  |
| C | -4.0331670000 | 0.0446890000  | -0.0000770000 |
| N | -3.9889390000 | -1.2853440000 | -0.0003990000 |
| N | -6.3021130000 | 0.1071310000  | 0.0004750000  |
| C | -6.4113360000 | -1.2691720000 | 0.0001600000  |
| N | -5.1351750000 | 0.7883920000  | 0.0002100000  |
| N | -5.1878110000 | -1.9100660000 | -0.0006060000 |
| O | -7.4702930000 | -1.8547880000 | 0.0002630000  |
| C | -7.5231590000 | 0.8900920000  | 0.0007440000  |
| H | -8.1218140000 | 0.6660950000  | -0.8860250000 |
| H | -8.1232500000 | 0.6629650000  | 0.8857070000  |

|   |               |               |               |
|---|---------------|---------------|---------------|
| H | -7.2290930000 | 1.9380310000  | 0.0027730000  |
| C | -5.1769350000 | -3.3602070000 | -0.0007280000 |
| H | -5.6837290000 | -3.7474070000 | 0.8871170000  |
| H | -5.6910900000 | -3.7469850000 | -0.8844480000 |
| H | -4.1337930000 | -3.6709060000 | -0.0050170000 |
| H | 4.9132600000  | 2.6331380000  | 0.0000200000  |
| C | 4.0184980000  | 0.1150220000  | -0.0002860000 |
| N | 5.3440260000  | 0.2566500000  | -0.0000770000 |
| N | 4.1434820000  | -2.1594110000 | -0.0005780000 |
| C | 5.5265630000  | -2.1633780000 | 0.0001090000  |
| C | 7.5003180000  | -0.7024740000 | 0.0008470000  |
| H | 7.7941660000  | -0.1334860000 | -0.8847540000 |
| H | 7.7952080000  | -0.1461980000 | 0.8942610000  |
| H | 7.9744890000  | -1.6816260000 | -0.0060910000 |
| C | 3.4167350000  | -3.4124490000 | -0.0002940000 |
| H | 2.7868930000  | -3.4704780000 | 0.8918910000  |
| H | 2.7841520000  | -3.4689420000 | -0.8906070000 |
| H | 4.1342800000  | -4.2304420000 | -0.0020230000 |
| N | 3.3719660000  | -1.0469540000 | -0.0006000000 |
| N | 6.0610780000  | -0.8830630000 | -0.0003820000 |
| O | 6.1964450000  | -3.1698440000 | 0.0009170000  |
| N | 0.9390860000  | 0.2725790000  | -0.0002520000 |
| H | 1.2567210000  | -0.6867940000 | -0.0004610000 |

Oxygen (Set A):

|   |              |              |               |
|---|--------------|--------------|---------------|
| C | 3.1440530000 | 3.7751930000 | -0.0000730000 |
| C | 3.8264470000 | 2.5627250000 | -0.0001450000 |
| C | 3.1710920000 | 1.3287340000 | -0.0001790000 |
| C | 1.7766410000 | 1.3870080000 | -0.0001100000 |
| C | 1.0737210000 | 2.6029600000 | -0.0000400000 |
| C | 1.7599510000 | 3.8108800000 | -0.0000230000 |
| H | 3.7108340000 | 4.7004580000 | -0.0000570000 |

|   |               |               |               |
|---|---------------|---------------|---------------|
| H | 1.2222040000  | 4.7543720000  | 0.0000340000  |
| C | -0.3401700000 | 0.8469790000  | -0.0000160000 |
| C | -1.4978250000 | 0.1006020000  | 0.0000320000  |
| C | -2.7024310000 | 0.8015920000  | 0.0000950000  |
| C | -2.7080160000 | 2.2063340000  | 0.0001080000  |
| C | -1.5313300000 | 2.9314750000  | 0.0000700000  |
| C | -0.3212590000 | 2.2427560000  | 0.0000110000  |
| H | -1.4778380000 | -0.9824190000 | 0.0000170000  |
| H | -3.6632740000 | 2.7183320000  | 0.0001570000  |
| H | -1.5548050000 | 4.0172340000  | 0.0000910000  |
| C | -3.9803410000 | 0.0577610000  | 0.0001600000  |
| N | -3.9029570000 | -1.2698130000 | 0.0006200000  |
| N | -6.2483120000 | 0.0672020000  | 0.0000680000  |
| C | -6.3238120000 | -1.3123340000 | 0.0004120000  |
| N | -5.0984320000 | 0.7762740000  | -0.0002520000 |
| N | -5.0849620000 | -1.9240150000 | 0.0004830000  |
| O | -7.3681770000 | -1.9224620000 | 0.0003960000  |
| C | -7.4885420000 | 0.8196600000  | -0.0005150000 |
| H | -8.0809950000 | 0.5801740000  | -0.8873530000 |
| H | -8.0829680000 | 0.5779940000  | 0.8843740000  |
| H | -7.2208970000 | 1.8746410000  | 0.0010240000  |
| C | -5.0381250000 | -3.3738340000 | 0.0010500000  |
| H | -5.5370050000 | -3.7724540000 | 0.8882030000  |
| H | -5.5408490000 | -3.7730920000 | -0.8836030000 |
| H | -3.9876220000 | -3.6585530000 | -0.0010610000 |
| O | 0.9215450000  | 0.3276650000  | -0.0000940000 |
| H | 4.9105020000  | 2.5556330000  | -0.0001900000 |
| C | 3.9537730000  | 0.0775410000  | -0.0002880000 |
| N | 5.2795250000  | 0.2109140000  | -0.0001300000 |
| N | 4.0486510000  | -2.1865820000 | -0.0003930000 |
| C | 5.4325020000  | -2.2107150000 | -0.0004490000 |
| C | 7.4251040000  | -0.7755250000 | 0.0000980000  |

|   |              |               |               |
|---|--------------|---------------|---------------|
| H | 7.7281150000 | -0.2172920000 | -0.8895760000 |
| H | 7.7277190000 | -0.2168430000 | 0.8896180000  |
| H | 7.8869340000 | -1.7606950000 | 0.0004290000  |
| C | 3.3013560000 | -3.4292040000 | -0.0003680000 |
| H | 2.6670150000 | -3.4704820000 | 0.8886710000  |
| H | 2.6669170000 | -3.4704430000 | -0.8893390000 |
| H | 4.0047210000 | -4.2593970000 | -0.0004260000 |
| N | 3.2906610000 | -1.0690250000 | -0.0003550000 |
| N | 5.9847510000 | -0.9385700000 | -0.0001470000 |
| O | 6.0893940000 | -3.2258780000 | -0.0002080000 |

**Sulphur (Set A):**

|   |               |               |               |
|---|---------------|---------------|---------------|
| C | -2.8495700000 | 3.7101070000  | 0.0002020000  |
| C | -3.7126450000 | 2.6209360000  | 0.0001590000  |
| C | -3.2392670000 | 1.3108460000  | 0.0001200000  |
| C | -1.8482930000 | 1.1136760000  | 0.0001250000  |
| C | -0.9714050000 | 2.2176180000  | 0.0001630000  |
| C | -1.4819430000 | 3.5136280000  | 0.0002030000  |
| H | -3.2563380000 | 4.7160340000  | 0.0002320000  |
| H | -0.8030200000 | 4.3618610000  | 0.0002330000  |
| C | 0.5629710000  | 0.4309750000  | 0.0000910000  |
| C | 1.8128450000  | -0.1710920000 | 0.0000500000  |
| C | 2.9465700000  | 0.6330620000  | 0.0000490000  |
| C | 2.8102910000  | 2.0301200000  | 0.0001080000  |
| C | 1.5635040000  | 2.6197080000  | 0.0001580000  |
| C | 0.4166880000  | 1.8234550000  | 0.0001440000  |
| H | 1.9183470000  | -1.2508280000 | 0.0000050000  |
| H | 3.7052680000  | 2.6416200000  | 0.0001050000  |
| H | 1.4778970000  | 3.7029190000  | 0.0001980000  |
| C | 4.2905400000  | 0.0179560000  | -0.0000480000 |
| N | 4.3451210000  | -1.3110790000 | -0.0003310000 |
| N | 6.5466520000  | 0.2518540000  | -0.0002460000 |



|   |               |               |               |
|---|---------------|---------------|---------------|
| C | 6.7583760000  | -1.1131540000 | -0.0003220000 |
| N | 5.3319080000  | 0.8435870000  | 0.0001360000  |
| N | 5.5862680000  | -1.8444920000 | -0.0002110000 |
| O | 7.8580900000  | -1.6170820000 | -0.0005020000 |
| C | 7.7058570000  | 1.1239510000  | 0.0000330000  |
| H | 8.3191830000  | 0.9450260000  | 0.8869890000  |
| H | 8.3214870000  | 0.9422300000  | -0.8847180000 |
| H | 7.3346180000  | 2.1470980000  | -0.0019980000 |
| C | 5.6833570000  | -3.2918100000 | -0.0006050000 |
| H | 6.2188880000  | -3.6391960000 | -0.8879620000 |
| H | 6.2238500000  | -3.6390950000 | 0.8837320000  |
| H | 4.6662330000  | -3.6792220000 | 0.0021770000  |
| H | -4.7859410000 | 2.7751950000  | 0.0001530000  |
| C | -4.2000810000 | 0.1941090000  | 0.0000680000  |
| N | -5.4980590000 | 0.4974670000  | 0.0000250000  |
| N | -4.5816870000 | -2.0453160000 | 0.0000770000  |
| C | -5.9565460000 | -1.8897470000 | -0.0000650000 |
| C | -7.7499140000 | -0.2117620000 | 0.0000250000  |
| H | -7.9791130000 | 0.3802020000  | 0.8898310000  |
| H | -7.9789580000 | 0.3809350000  | -0.8893270000 |
| H | -8.3326190000 | -1.1305370000 | -0.0003890000 |
| C | -3.9923350000 | -3.3699220000 | 0.0002330000  |
| H | -3.3678050000 | -3.4891240000 | -0.8891960000 |
| H | -3.3679750000 | -3.4889960000 | 0.8897990000  |
| H | -4.7924740000 | -4.1073240000 | 0.0002080000  |
| N | -3.6960330000 | -1.0281520000 | 0.0001160000  |
| N | -6.3410760000 | -0.5552420000 | -0.0000410000 |
| O | -6.7380690000 | -2.8117860000 | 0.0001060000  |
| S | -0.9767110000 | -0.4171380000 | 0.0000680000  |

**Boron (Set B):**

|   |               |               |               |
|---|---------------|---------------|---------------|
| C | -2.9817090000 | -1.5922140000 | -0.0000120000 |
|---|---------------|---------------|---------------|

|   |               |               |               |
|---|---------------|---------------|---------------|
| C | -3.4864220000 | -0.2937050000 | -0.0000550000 |
| C | -2.5920780000 | 0.7863280000  | -0.0000660000 |
| C | -1.2275360000 | 0.5607070000  | -0.0000320000 |
| C | -0.7382890000 | -0.7657630000 | -0.0000070000 |
| C | -1.6098300000 | -1.8373330000 | 0.0000080000  |
| H | -3.6810230000 | -2.4217370000 | -0.0000040000 |
| H | -2.9864740000 | 1.7979660000  | -0.0000880000 |
| H | -1.2453160000 | -2.8613330000 | 0.0000300000  |
| C | 1.2275350000  | 0.5607070000  | 0.0000130000  |
| C | 2.5920780000  | 0.7863280000  | 0.0000220000  |
| C | 3.4864220000  | -0.2937050000 | 0.0000070000  |
| C | 2.9817090000  | -1.5922140000 | -0.0000250000 |
| C | 1.6098310000  | -1.8373320000 | -0.0000300000 |
| C | 0.7382890000  | -0.7657620000 | -0.0000020000 |
| H | 2.9864730000  | 1.7979670000  | 0.0000400000  |
| H | 3.6810230000  | -2.4217360000 | -0.0000400000 |
| H | 1.2453160000  | -2.8613320000 | -0.0000520000 |
| B | 0.0000000000  | 1.5177950000  | 0.0000050000  |
| H | -0.0000010000 | 2.7051180000  | -0.0000310000 |
| C | 4.9455290000  | -0.0599720000 | 0.0000320000  |
| N | 5.3512240000  | 1.2056660000  | 0.0004560000  |
| N | 7.0586490000  | -0.8853660000 | -0.0001010000 |
| C | 7.6252710000  | 0.3749460000  | 0.0001110000  |
| C | -4.9455300000 | -0.0599740000 | -0.0000980000 |
| N | -5.7307500000 | -1.1335620000 | 0.0002540000  |
| N | -6.6893150000 | 1.3909500000  | -0.0004600000 |
| C | -7.6252700000 | 0.3749480000  | -0.0000740000 |
| N | 5.7307490000  | -1.1335610000 | -0.0003710000 |
| N | 6.6893160000  | 1.3909500000  | 0.0002790000  |
| N | -7.0586490000 | -0.8853660000 | 0.0000380000  |
| N | -5.3512240000 | 1.2056650000  | -0.0004960000 |
| O | 8.8192660000  | 0.5682680000  | 0.0001490000  |

|   |               |               |               |
|---|---------------|---------------|---------------|
| O | -8.8192660000 | 0.5682700000  | 0.0001300000  |
| C | 7.9454880000  | -2.0333230000 | -0.0006400000 |
| H | 8.5844400000  | -2.0229700000 | -0.8874970000 |
| H | 8.5872950000  | -2.0213910000 | 0.8840960000  |
| H | 7.3167230000  | -2.9217520000 | 0.0011050000  |
| C | 7.1664400000  | 2.7609390000  | 0.0008030000  |
| H | 7.7754200000  | 2.9536370000  | 0.8878510000  |
| H | 7.7790280000  | 2.9528550000  | -0.8838910000 |
| H | 6.2883420000  | 3.4040520000  | -0.0011970000 |
| C | -7.9454890000 | -2.0333230000 | 0.0007160000  |
| H | -8.5842640000 | -2.0230060000 | 0.8877010000  |
| H | -8.5874720000 | -2.0213530000 | -0.8838910000 |
| H | -7.3167240000 | -2.9217510000 | -0.0011890000 |
| C | -7.1664390000 | 2.7609380000  | -0.0006920000 |
| H | -7.7773830000 | 2.9530370000  | -0.8865010000 |
| H | -7.7770670000 | 2.9534550000  | 0.8852450000  |
| H | -6.2883400000 | 3.4040520000  | -0.0010000000 |

**Carbon (Set B):**

|   |               |               |               |
|---|---------------|---------------|---------------|
| C | -2.9987120000 | -1.6913390000 | -0.0004070000 |
| C | -3.4497830000 | -0.3672970000 | -0.0003710000 |
| C | -2.5236920000 | 0.6797220000  | -0.0002460000 |
| C | -1.1749440000 | 0.3891190000  | -0.0001570000 |
| C | -0.7285470000 | -0.9400730000 | -0.0001430000 |
| C | -1.6451980000 | -1.9844380000 | -0.0002950000 |
| H | -3.7311000000 | -2.4909600000 | -0.0005570000 |
| H | -2.8783670000 | 1.7057300000  | -0.0002230000 |
| H | -1.3116340000 | -3.0185330000 | -0.0003300000 |
| C | 1.1749440000  | 0.3891190000  | 0.0000400000  |
| C | 2.5236920000  | 0.6797220000  | 0.0001340000  |
| C | 3.4497830000  | -0.3672970000 | 0.0002670000  |
| C | 2.9987120000  | -1.6913390000 | 0.0003000000  |

|   |               |               |               |
|---|---------------|---------------|---------------|
| C | 1.6451980000  | -1.9844380000 | 0.0001790000  |
| C | 0.7285470000  | -0.9400730000 | 0.0000230000  |
| H | 2.8783670000  | 1.7057300000  | 0.0001110000  |
| H | 3.7311000000  | -2.4909600000 | 0.0004570000  |
| H | 1.3116340000  | -3.0185330000 | 0.0002110000  |
| C | 4.8986200000  | -0.0755400000 | 0.0003660000  |
| N | 5.2551250000  | 1.2059740000  | 0.0026580000  |
| N | 7.0440320000  | -0.8156830000 | -0.0018850000 |
| C | 7.5606230000  | 0.4651690000  | 0.0000000000  |
| C | -4.8986200000 | -0.0755400000 | -0.0004540000 |
| N | -5.7265700000 | -1.1163860000 | 0.0020810000  |
| N | -6.5855080000 | 1.4430650000  | -0.0022100000 |
| C | -7.5606230000 | 0.4651690000  | 0.0002270000  |
| N | 5.7265700000  | -1.1163860000 | -0.0021490000 |
| N | 6.5855080000  | 1.4430660000  | 0.0020450000  |
| N | -7.0440320000 | -0.8156830000 | 0.0019520000  |
| N | -5.2551250000 | 1.2059740000  | -0.0027480000 |
| O | 8.7462730000  | 0.7060670000  | 0.0000590000  |
| O | -8.7462730000 | 0.7060680000  | 0.0003420000  |
| C | 7.9749360000  | -1.9281750000 | -0.0044880000 |
| H | 8.6125720000  | -1.8916370000 | -0.8915980000 |
| H | 8.6160320000  | -1.8926730000 | 0.8801320000  |
| H | 7.3810000000  | -2.8402520000 | -0.0039230000 |
| C | 7.0089450000  | 2.8303850000  | 0.0047240000  |
| H | 7.6103150000  | 3.0454440000  | 0.8918630000  |
| H | 7.6132770000  | 3.0477530000  | -0.8797950000 |
| H | 6.1064720000  | 3.4388430000  | 0.0040760000  |
| C | -7.9749360000 | -1.9281750000 | 0.0047210000  |
| H | -8.6123240000 | -1.8917170000 | 0.8920130000  |
| H | -8.6162780000 | -1.8925920000 | -0.8797160000 |
| H | -7.3810010000 | -2.8402520000 | 0.0039090000  |
| C | -7.0089450000 | 2.8303850000  | -0.0046880000 |

|   |               |              |               |
|---|---------------|--------------|---------------|
| H | -7.6124430000 | 3.0448190000 | -0.8905130000 |
| H | -7.6111520000 | 3.0483820000 | 0.8811440000  |
| H | -6.1064720000 | 3.4388390000 | -0.0065660000 |
| C | 0.0000000000  | 1.3266900000 | -0.0000610000 |
| H | 0.0000770000  | 1.9836900000 | -0.8796460000 |
| H | -0.0000770000 | 1.9836950000 | 0.8795200000  |

**Nitrogen (Set B):**

|   |               |               |               |
|---|---------------|---------------|---------------|
| C | -3.0237210000 | -1.7628500000 | -0.0000240000 |
| C | -3.4179260000 | -0.4133900000 | 0.0001000000  |
| C | -2.4640000000 | 0.5995880000  | 0.0002430000  |
| C | -1.1270190000 | 0.2354980000  | 0.0002560000  |
| C | -0.7190790000 | -1.1150270000 | 0.0001250000  |
| C | -1.6889780000 | -2.1150600000 | -0.0000060000 |
| H | -3.7914930000 | -2.5275540000 | -0.0001340000 |
| H | -2.7740160000 | 1.6392150000  | 0.0003510000  |
| H | -1.3998500000 | -3.1623390000 | -0.0001070000 |
| C | 1.1270150000  | 0.2355080000  | 0.0002730000  |
| C | 2.4639990000  | 0.5995890000  | 0.0003060000  |
| C | 3.4179250000  | -0.4133880000 | 0.0002110000  |
| C | 3.0237240000  | -1.7628500000 | 0.0000890000  |
| C | 1.6889790000  | -2.1150550000 | 0.0000570000  |
| C | 0.7190820000  | -1.1150220000 | 0.0001350000  |
| H | 2.7740160000  | 1.6392160000  | 0.0004150000  |
| H | 3.7914940000  | -2.5275540000 | 0.0000230000  |
| H | 1.3998460000  | -3.1623330000 | -0.0000360000 |
| C | 4.8549210000  | -0.0651050000 | 0.0002350000  |
| N | 5.1630410000  | 1.2292810000  | 0.0001690000  |
| N | 7.0264300000  | -0.7244480000 | 0.0000960000  |
| C | 7.4947830000  | 0.5743790000  | 0.0000020000  |

|   |               |               |               |
|---|---------------|---------------|---------------|
| C | -4.8549230000 | -0.0651150000 | 0.0000810000  |
| N | -5.7210400000 | -1.0732770000 | 0.0002900000  |
| N | -6.4840540000 | 1.5156510000  | -0.0000660000 |
| C | -7.4947830000 | 0.5743730000  | -0.0001090000 |
| N | 5.7210410000  | -1.0732810000 | 0.0001240000  |
| N | 6.4840630000  | 1.5156510000  | 0.0000640000  |
| N | -7.0264360000 | -0.7244450000 | -0.0001470000 |
| N | -5.1630400000 | 1.2292840000  | -0.0003010000 |
| O | 8.6707080000  | 0.8596750000  | -0.0005200000 |
| O | -8.6707050000 | 0.8596840000  | -0.0003670000 |
| C | 7.9970830000  | -1.8025260000 | -0.0003400000 |
| H | 8.6331800000  | -1.7445990000 | -0.8874010000 |
| H | 8.6363060000  | -1.7422480000 | 0.8842770000  |
| H | 7.4363730000  | -2.7353520000 | 0.0018170000  |
| C | 6.8558420000  | 2.9175720000  | -0.0002250000 |
| H | 7.4504810000  | 3.1563730000  | 0.8853690000  |
| H | 7.4501980000  | 3.1560950000  | -0.8860860000 |
| H | 5.9315540000  | 3.4922980000  | -0.0001680000 |
| C | -7.9970830000 | -1.8025280000 | 0.0001200000  |
| H | -8.6330710000 | -1.7448620000 | 0.8872820000  |
| H | -8.6364160000 | -1.7419990000 | -0.8843950000 |
| H | -7.4363710000 | -2.7353510000 | -0.0023670000 |
| C | -6.8558430000 | 2.9175700000  | -0.0005860000 |
| H | -7.4479240000 | 3.1566700000  | -0.8878380000 |
| H | -7.4527580000 | 3.1557820000  | 0.8836110000  |
| H | -5.9315620000 | 3.4923020000  | 0.0021450000  |
| N | -0.0000010000 | 1.0345670000  | 0.0004200000  |
| H | -0.0000260000 | 2.0415290000  | 0.0001320000  |

Oxygen (Set B):

|   |               |               |               |
|---|---------------|---------------|---------------|
| C | -3.0406430000 | -1.8230770000 | -0.0000620000 |
|---|---------------|---------------|---------------|

|   |               |               |               |
|---|---------------|---------------|---------------|
| C | -3.3885980000 | -0.4623300000 | -0.0000870000 |
| C | -2.3993740000 | 0.5197410000  | -0.0000740000 |
| C | -1.0906640000 | 0.0911260000  | -0.0000380000 |
| C | -0.7201890000 | -1.2582060000 | -0.0000100000 |
| C | -1.7192920000 | -2.2282090000 | -0.0000220000 |
| H | -3.8362300000 | -2.5590390000 | -0.0000740000 |
| H | -2.6540620000 | 1.5726470000  | -0.0000930000 |
| H | -1.4670850000 | -3.2845040000 | -0.0000050000 |
| C | 1.0906670000  | 0.0911230000  | 0.0000100000  |
| C | 2.3993780000  | 0.5197350000  | 0.0000210000  |
| C | 3.3886000000  | -0.4623390000 | 0.0000470000  |
| C | 3.0406420000  | -1.8230850000 | 0.0000680000  |
| C | 1.7192890000  | -2.2282140000 | 0.0000530000  |
| C | 0.7201890000  | -1.2582080000 | 0.0000220000  |
| H | 2.6540720000  | 1.5726390000  | 0.0000010000  |
| H | 3.8362260000  | -2.5590500000 | 0.0000900000  |
| H | 1.4670800000  | -3.2845080000 | 0.0000660000  |
| C | 4.8126340000  | -0.0638940000 | 0.0000370000  |
| N | 5.0719080000  | 1.2402820000  | 0.0002250000  |
| N | 7.0048380000  | -0.6443380000 | 0.0000880000  |
| C | 7.4253240000  | 0.6718670000  | 0.0000870000  |
| C | -4.8126300000 | -0.0638790000 | -0.0001240000 |
| N | -5.7135160000 | -1.0408840000 | 0.0000290000  |
| N | -6.3804340000 | 1.5758620000  | -0.0002160000 |
| C | -7.4253190000 | 0.6718840000  | 0.0000220000  |
| N | 5.7135150000  | -1.0408860000 | -0.0001260000 |
| N | 6.3804110000  | 1.5758630000  | 0.0000250000  |
| N | -7.0048190000 | -0.6443510000 | -0.0001040000 |
| N | -5.0719080000 | 1.2402830000  | -0.0002990000 |
| O | 8.5896390000  | 0.9991610000  | 0.0000640000  |
| O | -8.5896480000 | 0.9991320000  | 0.0001760000  |

|   |               |               |               |
|---|---------------|---------------|---------------|
| C | 8.0156130000  | -1.6848610000 | -0.0001730000 |
| H | 8.6491980000  | -1.6025320000 | -0.8870830000 |
| H | 8.6517470000  | -1.6002640000 | 0.8846610000  |
| H | 7.4909090000  | -2.6384170000 | 0.0017440000  |
| C | 6.6998350000  | 2.9909380000  | 0.0002780000  |
| H | 7.2832170000  | 3.2512620000  | 0.8872290000  |
| H | 7.2866000000  | 3.2506460000  | -0.8845840000 |
| H | 5.7547370000  | 3.5307340000  | -0.0016590000 |
| C | -8.0156070000 | -1.6848590000 | 0.0002770000  |
| H | -8.6490360000 | -1.6025740000 | 0.8873030000  |
| H | -8.6518970000 | -1.6002020000 | -0.8844390000 |
| H | -7.4909170000 | -2.6384240000 | -0.0017890000 |
| C | -6.6998410000 | 2.9909420000  | -0.0002650000 |
| H | -7.2850470000 | 3.2509030000  | -0.8861020000 |
| H | -7.2847750000 | 3.2510270000  | 0.8857160000  |
| H | -5.7547340000 | 3.5307250000  | -0.0004490000 |
| O | 0.0000030000  | 0.9128230000  | -0.0000250000 |

Sulphur (Set B):

|   |               |               |               |
|---|---------------|---------------|---------------|
| C | -2.9672190000 | -1.6637380000 | -0.0000080000 |
| C | -3.4832760000 | -0.3586050000 | -0.0000810000 |
| C | -2.6159130000 | 0.7277830000  | -0.0001120000 |
| C | -1.2493010000 | 0.4938630000  | -0.0000780000 |
| C | -0.7208670000 | -0.8073110000 | -0.0000270000 |
| C | -1.6064050000 | -1.8867650000 | 0.0000130000  |
| H | -3.6591440000 | -2.4980250000 | 0.0000190000  |
| H | -3.0157720000 | 1.7359560000  | -0.0001630000 |
| H | -1.2232560000 | -2.9035180000 | 0.0000570000  |
| C | 1.2493010000  | 0.4938630000  | -0.0000410000 |
| C | 2.6159130000  | 0.7277830000  | -0.0000260000 |
| C | 3.4832760000  | -0.3586050000 | -0.0000070000 |



|   |               |               |               |
|---|---------------|---------------|---------------|
| C | 2.9672190000  | -1.6637380000 | -0.0000070000 |
| C | 1.6064060000  | -1.8867650000 | -0.0000100000 |
| C | 0.7208670000  | -0.8073110000 | -0.0000230000 |
| H | 3.0157720000  | 1.7359560000  | -0.0000330000 |
| H | 3.6591440000  | -2.4980250000 | 0.0000050000  |
| H | 1.2232560000  | -2.9035180000 | 0.0000000000  |
| C | 4.9448880000  | -0.1368790000 | 0.0000220000  |
| N | 5.3631550000  | 1.1255040000  | 0.0004770000  |
| N | 7.0486580000  | -0.9836080000 | -0.0000740000 |
| C | 7.6284210000  | 0.2704660000  | 0.0001010000  |
| C | -4.9448880000 | -0.1368790000 | -0.0001380000 |
| N | -5.7180810000 | -1.2175220000 | 0.0002300000  |
| N | -6.7031160000 | 1.2967080000  | -0.0004620000 |
| C | -7.6284210000 | 0.2704660000  | -0.0000700000 |
| N | 5.7180820000  | -1.2175220000 | -0.0003700000 |
| N | 6.7031170000  | 1.2967080000  | 0.0002970000  |
| N | -7.0486580000 | -0.9836080000 | 0.0000270000  |
| N | -5.3631550000 | 1.1255040000  | -0.0005170000 |
| O | 8.8241890000  | 0.4517690000  | 0.0002010000  |
| O | -8.8241880000 | 0.4517700000  | 0.0002160000  |
| C | 7.9230570000  | -2.1411400000 | -0.0006080000 |
| H | 8.5617910000  | -2.1377510000 | -0.8876580000 |
| H | 8.5649660000  | -2.1359470000 | 0.8840980000  |
| H | 7.2845130000  | -3.0225580000 | 0.0013660000  |
| C | 7.1953180000  | 2.6612940000  | 0.0008770000  |
| H | 7.8062990000  | 2.8471450000  | 0.8879980000  |
| H | 7.8100130000  | 2.8463460000  | -0.8838050000 |
| H | 6.3244410000  | 3.3141400000  | -0.0011690000 |
| C | -7.9230570000 | -2.1411400000 | 0.0007700000  |
| H | -8.5615870000 | -2.1377550000 | 0.8879680000  |
| H | -8.5651710000 | -2.1359430000 | -0.8837870000 |

|   |               |               |               |
|---|---------------|---------------|---------------|
| H | -7.2845130000 | -3.0225580000 | -0.0013530000 |
| C | -7.1953190000 | 2.6612930000  | -0.0006440000 |
| H | -7.8083720000 | 2.8465430000  | -0.8864400000 |
| H | -7.8079460000 | 2.8469460000  | 0.8853660000  |
| H | -6.3244400000 | 3.3141400000  | -0.0009990000 |
| S | 0.0000000000  | 1.7298340000  | -0.0000920000 |

PBE0/6-311++G(d,p)

Boron (Set A):

|   |               |               |               |
|---|---------------|---------------|---------------|
| C | -2.9361600000 | 3.7091430000  | 0.1929400000  |
| C | -3.7849760000 | 2.6167090000  | 0.1182540000  |
| C | -3.2653380000 | 1.3154380000  | 0.0492240000  |
| C | -1.8819960000 | 1.1287920000  | 0.0230250000  |
| C | -1.0353430000 | 2.2601480000  | 0.1164230000  |
| C | -1.5488330000 | 3.5417510000  | 0.2013100000  |
| H | -3.3571530000 | 4.7077370000  | 0.2555650000  |
| H | -0.8969380000 | 4.4073470000  | 0.2679430000  |
| C | 0.4821130000  | 0.4417890000  | -0.0539070000 |
| C | 1.7297150000  | -0.1595200000 | -0.1048290000 |
| C | 2.8924230000  | 0.6199230000  | 0.0008910000  |
| C | 2.7741030000  | 2.0029950000  | 0.1435950000  |
| C | 1.5251250000  | 2.6235970000  | 0.1861890000  |
| C | 0.3855500000  | 1.8445390000  | 0.0926980000  |
| H | 1.8253290000  | -1.2332430000 | -0.2241130000 |
| H | 3.6780140000  | 2.5965690000  | 0.2197570000  |
| H | 1.4677390000  | 3.7026520000  | 0.2924040000  |
| C | 4.2269010000  | -0.0129250000 | -0.0432530000 |
| N | 4.2647920000  | -1.3339080000 | -0.1777590000 |
| N | 6.4858210000  | 0.1807850000  | 0.0108460000  |
| C | 6.6792690000  | -1.1814870000 | -0.1264560000 |
| N | 5.2837000000  | 0.7876160000  | 0.0545590000  |

|   |               |               |               |
|---|---------------|---------------|---------------|
| N | 5.4931650000  | -1.8858340000 | -0.2164650000 |
| O | 7.7749570000  | -1.7033570000 | -0.1639080000 |
| C | 7.6301020000  | 1.0620420000  | 0.1180930000  |
| H | 7.5866750000  | 1.5992870000  | 1.0681140000  |
| H | 8.5332610000  | 0.4584820000  | 0.0680290000  |
| H | 7.6110480000  | 1.7827790000  | -0.7023900000 |
| C | 5.5214550000  | -3.3264060000 | -0.3642030000 |
| H | 5.0229840000  | -3.6053710000 | -1.2951540000 |
| H | 6.5598350000  | -3.6487960000 | -0.3817490000 |
| H | 4.9963410000  | -3.7874110000 | 0.4752550000  |
| H | -4.8599160000 | 2.7559370000  | 0.1231980000  |
| C | -4.2031950000 | 0.1720640000  | 0.0318690000  |
| N | -5.3723870000 | 0.3665620000  | -0.5695750000 |
| N | -4.6815820000 | -1.9685880000 | 0.5915130000  |
| C | -5.9356950000 | -1.9156200000 | 0.0118880000  |
| C | -7.4888390000 | -0.4699010000 | -1.2115730000 |
| H | -7.9841190000 | 0.3971270000  | -0.7699790000 |
| H | -7.3195360000 | -0.2820830000 | -2.2746260000 |
| H | -8.0979240000 | -1.3612930000 | -1.0815740000 |
| C | -4.2469750000 | -3.1795450000 | 1.2571240000  |
| H | -3.2794450000 | -3.4805860000 | 0.8515370000  |
| H | -4.1435030000 | -2.9937900000 | 2.3291540000  |
| H | -4.9908240000 | -3.9533090000 | 1.0825310000  |
| N | -3.8112160000 | -0.9394810000 | 0.6418800000  |
| N | -6.2199510000 | -0.6827510000 | -0.5468740000 |
| O | -6.7086530000 | -2.8515820000 | -0.0017110000 |
| B | -0.9639400000 | -0.1235370000 | -0.1745850000 |
| H | -1.2754290000 | -1.2367960000 | -0.4587360000 |

Carbon (Set A):

|   |               |              |               |
|---|---------------|--------------|---------------|
| C | -2.9811270000 | 3.7271210000 | -0.0000130000 |
|---|---------------|--------------|---------------|

|   |               |               |               |
|---|---------------|---------------|---------------|
| C | -3.7746340000 | 2.5882300000  | 0.0000260000  |
| C | -3.2141640000 | 1.3025770000  | 0.0002920000  |
| C | -1.8199900000 | 1.1929380000  | 0.0004530000  |
| C | -1.0257900000 | 2.3557390000  | 0.0003410000  |
| C | -1.5959450000 | 3.6230570000  | 0.0001480000  |
| H | -3.4525860000 | 4.7044130000  | -0.0001660000 |
| H | -0.9745140000 | 4.5129500000  | 0.0001000000  |
| C | 0.4553360000  | 0.5671490000  | 0.0006530000  |
| C | 1.6793450000  | -0.0758890000 | 0.0007540000  |
| C | 2.8523140000  | 0.6873250000  | 0.0005970000  |
| C | 2.7728090000  | 2.0859710000  | 0.0003920000  |
| C | 1.5451300000  | 2.7304880000  | 0.0003230000  |
| C | 0.3813670000  | 1.9664860000  | 0.0004430000  |
| H | 1.7501960000  | -1.1579340000 | 0.0009040000  |
| H | 3.6919800000  | 2.6595240000  | 0.0002710000  |
| H | 1.5033240000  | 3.8152050000  | 0.0002490000  |
| C | 4.1710110000  | 0.0199920000  | 0.0006190000  |
| N | 4.1782290000  | -1.3093480000 | 0.0014510000  |
| N | 6.4352320000  | 0.1628520000  | -0.0001520000 |
| C | 6.5966420000  | -1.2097730000 | -0.0005220000 |
| N | 5.2476110000  | 0.7995870000  | -0.0002550000 |
| N | 5.3940510000  | -1.8910100000 | 0.0014270000  |
| O | 7.6799280000  | -1.7590970000 | -0.0020210000 |
| C | 7.5997820000  | 1.0237800000  | -0.0025270000 |
| H | 7.5790770000  | 1.6635440000  | 0.8824530000  |
| H | 8.4888930000  | 0.3977440000  | 0.0056630000  |
| H | 7.5868470000  | 1.6500770000  | -0.8973840000 |
| C | 5.3884170000  | -3.3390440000 | 0.0009260000  |
| H | 4.8750230000  | -3.7003270000 | -0.8930450000 |
| H | 6.4190660000  | -3.6857980000 | 0.0085540000  |
| H | 4.8613240000  | -3.6997670000 | 0.8869730000  |

|   |               |               |               |
|---|---------------|---------------|---------------|
| H | -4.8538030000 | 2.6792420000  | -0.0001500000 |
| C | -4.1216480000 | 0.1333100000  | 0.0003090000  |
| N | -5.4291710000 | 0.3917950000  | -0.0002450000 |
| N | -4.4417850000 | -2.1137350000 | 0.0008940000  |
| C | -5.8178010000 | -1.9966100000 | -0.0005090000 |
| C | -7.6604020000 | -0.3828640000 | -0.0017370000 |
| H | -7.9077690000 | 0.2054740000  | 0.8845230000  |
| H | -7.9090250000 | 0.1937000000  | -0.8954680000 |
| H | -8.2078550000 | -1.3223690000 | 0.0045350000  |
| C | -3.8322450000 | -3.4272170000 | 0.0003470000  |
| H | -3.2141450000 | -3.5418960000 | -0.8930930000 |
| H | -3.2043270000 | -3.5371060000 | 0.8874060000  |
| H | -4.6243280000 | -4.1723280000 | 0.0064020000  |
| N | -3.5784700000 | -1.0770750000 | 0.0009180000  |
| N | -6.2426160000 | -0.6803690000 | -0.0000500000 |
| O | -6.5744060000 | -2.9460520000 | -0.0016760000 |
| C | -0.9268510000 | -0.0207150000 | 0.0006130000  |
| H | -1.1112110000 | -0.6572630000 | -0.8710580000 |
| H | -1.1112660000 | -0.6570590000 | 0.8724100000  |

Nitrogen (Set A):

|   |               |              |               |
|---|---------------|--------------|---------------|
| C | 3.1179170000  | 3.7893140000 | 0.0000960000  |
| C | 3.8433850000  | 2.5985660000 | -0.0000390000 |
| C | 3.2187120000  | 1.3497560000 | -0.0001440000 |
| C | 1.8146670000  | 1.3472140000 | -0.0001130000 |
| C | 1.0685270000  | 2.5529270000 | 0.0000220000  |
| C | 1.7297100000  | 3.7774350000 | 0.0001290000  |
| H | 3.6510240000  | 4.7337060000 | 0.0001740000  |
| H | 1.1699670000  | 4.7073150000 | 0.0002360000  |
| C | -0.3542780000 | 0.7599980000 | -0.0001170000 |
| C | -1.5458750000 | 0.0480230000 | -0.0001590000 |

|   |               |               |               |
|---|---------------|---------------|---------------|
| C | -2.7374460000 | 0.7693570000  | -0.0000550000 |
| C | -2.7200230000 | 2.1769090000  | 0.0000850000  |
| C | -1.5268940000 | 2.8761800000  | 0.0001210000  |
| C | -0.3221880000 | 2.1723780000  | 0.0000220000  |
| H | -1.5672720000 | -1.0352210000 | -0.0002710000 |
| H | -3.6643830000 | 2.7065200000  | 0.0001640000  |
| H | -1.5338860000 | 3.9614910000  | 0.0002200000  |
| C | -4.0284080000 | 0.0479490000  | -0.0000920000 |
| N | -3.9777990000 | -1.2823130000 | -0.0004730000 |
| N | -6.2954200000 | 0.0993630000  | 0.0004530000  |
| C | -6.3941070000 | -1.2746940000 | -0.0000860000 |
| N | -5.1341790000 | 0.7862610000  | 0.0002950000  |
| N | -5.1718330000 | -1.9111600000 | -0.0007110000 |
| O | -7.4541200000 | -1.8678890000 | 0.0001260000  |
| C | -7.5195990000 | 0.8748940000  | 0.0008390000  |
| H | -8.1144730000 | 0.6475370000  | -0.8865200000 |
| H | -8.1165180000 | 0.6430290000  | 0.8856100000  |
| H | -7.2291760000 | 1.9230200000  | 0.0037520000  |
| C | -5.1545610000 | -3.3599310000 | -0.0007350000 |
| H | -5.6590370000 | -3.7469560000 | 0.8873990000  |
| H | -5.6667140000 | -3.7466630000 | -0.8845200000 |
| H | -4.1101490000 | -3.6634770000 | -0.0051800000 |
| H | 4.9265270000  | 2.6258540000  | -0.0000580000 |
| C | 4.0134080000  | 0.1123430000  | -0.0002460000 |
| N | 5.3399290000  | 0.2435440000  | -0.0000860000 |
| N | 4.1184740000  | -2.1610360000 | -0.0004720000 |
| C | 5.4988920000  | -2.1719070000 | 0.0001960000  |
| C | 7.4862280000  | -0.7396590000 | 0.0007780000  |
| H | 7.7870480000  | -0.1763510000 | -0.8850570000 |
| H | 7.7881220000  | -0.1900350000 | 0.8949350000  |
| H | 7.9418540000  | -1.7268840000 | -0.0067100000 |

|   |              |               |               |
|---|--------------|---------------|---------------|
| C | 3.3897410000 | -3.4115910000 | -0.0001260000 |
| H | 2.7621310000 | -3.4690060000 | 0.8925960000  |
| H | 2.7593590000 | -3.4675520000 | -0.8909510000 |
| H | 4.1099600000 | -4.2263970000 | -0.0018230000 |
| N | 3.3576700000 | -1.0451500000 | -0.0005040000 |
| N | 6.0460200000 | -0.9007940000 | -0.0004020000 |
| O | 6.1627700000 | -3.1883670000 | 0.0009680000  |
| N | 0.9413020000 | 0.2916090000  | -0.0001880000 |
| H | 1.2604340000 | -0.6649150000 | -0.0003590000 |

Oxygen (Set A):

|   |               |               |               |
|---|---------------|---------------|---------------|
| C | 3.1508540000  | 3.7759600000  | -0.0002160000 |
| C | 3.8314840000  | 2.5605480000  | -0.0002470000 |
| C | 3.1710200000  | 1.3268610000  | -0.0002250000 |
| C | 1.7750740000  | 1.3896960000  | -0.0001560000 |
| C | 1.0730760000  | 2.6089760000  | -0.0001210000 |
| C | 1.7645830000  | 3.8164200000  | -0.0001530000 |
| H | 3.7196840000  | 4.6993660000  | -0.0002410000 |
| H | 1.2328340000  | 4.7619760000  | -0.0001260000 |
| C | -0.3423850000 | 0.8504670000  | -0.0000450000 |
| C | -1.5004460000 | 0.1010190000  | 0.0000160000  |
| C | -2.7072830000 | 0.8022280000  | 0.0000740000  |
| C | -2.7150750000 | 2.2085390000  | 0.0000690000  |
| C | -1.5374350000 | 2.9360980000  | 0.0000060000  |
| C | -0.3239650000 | 2.2486680000  | -0.0000500000 |
| H | -1.4815780000 | -0.9810310000 | 0.0000180000  |
| H | -3.6703760000 | 2.7184430000  | 0.0001150000  |
| H | -1.5651730000 | 4.0206240000  | 0.0000040000  |
| C | -3.9845650000 | 0.0565840000  | 0.0001410000  |
| N | -3.9062440000 | -1.2713220000 | 0.0003590000  |
| N | -6.2507380000 | 0.0641210000  | 0.0002520000  |

|   |               |               |               |
|---|---------------|---------------|---------------|
| C | -6.3213610000 | -1.3124760000 | 0.0003420000  |
| N | -5.1038090000 | 0.7739860000  | -0.0000280000 |
| N | -5.0861950000 | -1.9245940000 | 0.0002260000  |
| O | -7.3689530000 | -1.9260380000 | 0.0003090000  |
| C | -7.4909550000 | 0.8139230000  | -0.0001030000 |
| H | -8.0806070000 | 0.5733170000  | -0.8874060000 |
| H | -8.0828480000 | 0.5700560000  | 0.8847740000  |
| H | -7.2228050000 | 1.8679590000  | 0.0020980000  |
| C | -5.0389870000 | -3.3730530000 | 0.0005810000  |
| H | -5.5369880000 | -3.7695690000 | 0.8880780000  |
| H | -5.5415580000 | -3.7699420000 | -0.8841260000 |
| H | -3.9885420000 | -3.6549380000 | -0.0019870000 |
| O | 0.9193510000  | 0.3310320000  | -0.0001090000 |
| H | 4.9145380000  | 2.5488940000  | -0.0002960000 |
| C | 3.9536890000  | 0.0746190000  | -0.0002700000 |
| N | 5.2797190000  | 0.2104190000  | -0.0001910000 |
| N | 4.0519520000  | -2.1871700000 | -0.0001710000 |
| C | 5.4328170000  | -2.2049660000 | -0.0002820000 |
| C | 7.4247640000  | -0.7789060000 | 0.0000150000  |
| H | 7.7292430000  | -0.2240980000 | -0.8902430000 |
| H | 7.7289390000  | -0.2234270000 | 0.8899530000  |
| H | 7.8774460000  | -1.7676150000 | 0.0004430000  |
| C | 3.3147270000  | -3.4341650000 | 0.0000090000  |
| H | 2.6829700000  | -3.4806400000 | 0.8896120000  |
| H | 2.6827890000  | -3.4807750000 | -0.8894560000 |
| H | 4.0284500000  | -4.2546450000 | -0.0000020000 |
| N | 3.2929760000  | -1.0734700000 | -0.0002010000 |
| N | 5.9850800000  | -0.9363750000 | -0.0001350000 |
| O | 6.0941790000  | -3.2231620000 | 0.0000120000  |

Sulphur (Set A):



|   |               |               |               |
|---|---------------|---------------|---------------|
| C | -2.8623880000 | 3.7152610000  | 0.0001630000  |
| C | -3.7223220000 | 2.6213810000  | 0.0001330000  |
| C | -3.2413550000 | 1.3119560000  | 0.0000720000  |
| C | -1.8484210000 | 1.1215970000  | 0.0000380000  |
| C | -0.9735360000 | 2.2304700000  | 0.0000700000  |
| C | -1.4913760000 | 3.5258990000  | 0.0001330000  |
| H | -3.2733570000 | 4.7189410000  | 0.0002120000  |
| H | -0.8191500000 | 4.3778350000  | 0.0001590000  |
| C | 0.5603570000  | 0.4395200000  | -0.0000240000 |
| C | 1.8104210000  | -0.1667600000 | -0.0000570000 |
| C | 2.9468710000  | 0.6369920000  | -0.0000370000 |
| C | 2.8144010000  | 2.0361660000  | 0.0000230000  |
| C | 1.5672710000  | 2.6294890000  | 0.0000620000  |
| C | 0.4165670000  | 1.8351920000  | 0.0000380000  |
| H | 1.9160360000  | -1.2450800000 | -0.0001030000 |
| H | 3.7104180000  | 2.6444190000  | 0.0000380000  |
| H | 1.4860760000  | 3.7118030000  | 0.0001080000  |
| C | 4.2895200000  | 0.0177050000  | -0.0000840000 |
| N | 4.3407290000  | -1.3117570000 | -0.0003870000 |
| N | 6.5442400000  | 0.2457780000  | -0.0001130000 |
| C | 6.7484840000  | -1.1172910000 | -0.0001760000 |
| N | 5.3334520000  | 0.8405660000  | 0.0001660000  |
| N | 5.5787410000  | -1.8468380000 | -0.0001960000 |
| O | 7.8508490000  | -1.6261350000 | -0.0002680000 |
| C | 7.7053550000  | 1.1129590000  | 0.0002870000  |
| H | 8.3155300000  | 0.9313140000  | 0.8877610000  |
| H | 8.3184390000  | 0.9278610000  | -0.8844190000 |
| H | 7.3356480000  | 2.1358120000  | -0.0022270000 |
| C | 5.6727430000  | -3.2930000000 | -0.0007080000 |
| H | 6.2067760000  | -3.6391430000 | -0.8883420000 |
| H | 6.2117330000  | -3.6392060000 | 0.8838510000  |

|   |               |               |               |
|---|---------------|---------------|---------------|
| H | 4.6547050000  | -3.6757710000 | 0.0020330000  |
| H | -4.7954940000 | 2.7692390000  | 0.0001590000  |
| C | -4.1966020000 | 0.1904110000  | 0.0000460000  |
| N | -5.4955960000 | 0.4897960000  | 0.0000960000  |
| N | -4.5683520000 | -2.0476670000 | 0.0000410000  |
| C | -5.9407480000 | -1.8927080000 | -0.0000470000 |
| C | -7.7437180000 | -0.2337550000 | 0.0002730000  |
| H | -7.9778890000 | 0.3538480000  | 0.8906490000  |
| H | -7.9779080000 | 0.3546600000  | -0.8895550000 |
| H | -8.3129960000 | -1.1601730000 | -0.0001270000 |
| C | -3.9871540000 | -3.3744620000 | 0.0001800000  |
| H | -3.3661790000 | -3.4982130000 | -0.8897630000 |
| H | -3.3662830000 | -3.4980820000 | 0.8902150000  |
| H | -4.7958760000 | -4.1014550000 | 0.0001850000  |
| N | -3.6869140000 | -1.0299080000 | 0.0000500000  |
| N | -6.3331920000 | -0.5642870000 | 0.0000590000  |
| O | -6.7221620000 | -2.8213160000 | 0.0002310000  |
| S | -0.9773560000 | -0.4000580000 | -0.0000530000 |

Boron (Set A):

|   |               |               |               |
|---|---------------|---------------|---------------|
| C | -2.9878750000 | -1.5952670000 | -0.0000340000 |
| C | -3.4917740000 | -0.2942840000 | -0.0000590000 |
| C | -2.5955980000 | 0.7867910000  | -0.0000580000 |
| C | -1.2287890000 | 0.5590010000  | -0.0000270000 |
| C | -0.7395190000 | -0.7700270000 | 0.0000030000  |
| C | -1.6143230000 | -1.8418300000 | 0.0000010000  |
| H | -3.6875140000 | -2.4232380000 | -0.0000370000 |
| H | -2.9905630000 | 1.7967650000  | -0.0000780000 |
| H | -1.2547080000 | -2.8663300000 | 0.0000220000  |
| C | 1.2287880000  | 0.5590010000  | 0.0000250000  |
| C | 2.5955980000  | 0.7867910000  | 0.0000430000  |

|   |               |               |               |
|---|---------------|---------------|---------------|
| C | 3.4917740000  | -0.2942840000 | 0.0000730000  |
| C | 2.9878750000  | -1.5952670000 | 0.0000810000  |
| C | 1.6143240000  | -1.8418300000 | 0.0000580000  |
| C | 0.7395190000  | -0.7700270000 | 0.0000320000  |
| H | 2.9905630000  | 1.7967650000  | 0.0000350000  |
| H | 3.6875140000  | -2.4232380000 | 0.0001050000  |
| H | 1.2547080000  | -2.8663300000 | 0.0000640000  |
| B | 0.0000000000  | 1.5168320000  | -0.0000110000 |
| H | 0.0000000000  | 2.7107510000  | -0.0000320000 |
| C | 4.9512270000  | -0.0596540000 | 0.0000920000  |
| N | 5.3563470000  | 1.2064770000  | 0.0002380000  |
| N | 7.0630250000  | -0.8832930000 | 0.0001260000  |
| C | 7.6243630000  | 0.3759590000  | 0.0000720000  |
| C | -4.9512270000 | -0.0596550000 | -0.0000850000 |
| N | -5.7374930000 | -1.1330010000 | -0.0000200000 |
| N | -6.6922370000 | 1.3914070000  | -0.0002130000 |
| C | -7.6243630000 | 0.3759590000  | -0.0000410000 |
| N | 5.7374930000  | -1.1330010000 | -0.0000810000 |
| N | 6.6922370000  | 1.3914070000  | 0.0000200000  |
| N | -7.0630250000 | -0.8832930000 | -0.0002240000 |
| N | -5.3563470000 | 1.2064770000  | -0.0002380000 |
| O | 8.8226190000  | 0.5708880000  | 0.0000070000  |
| O | -8.8226190000 | 0.5708880000  | 0.0001250000  |
| C | 7.9507610000  | -2.0287990000 | -0.0002360000 |
| H | 8.5872890000  | -2.0163870000 | -0.8876910000 |
| H | 8.5910680000  | -2.0137350000 | 0.8844080000  |
| H | 7.3218120000  | -2.9161170000 | 0.0023470000  |
| C | 7.1689810000  | 2.7601040000  | 0.0002960000  |
| H | 7.7763590000  | 2.9509790000  | 0.8877170000  |
| H | 7.7804500000  | 2.9496940000  | -0.8845440000 |
| H | 6.2900560000  | 3.4007290000  | -0.0021170000 |

|   |               |               |               |
|---|---------------|---------------|---------------|
| C | -7.9507610000 | -2.0287990000 | 0.0001830000  |
| H | -8.5871300000 | -2.0164830000 | 0.8877540000  |
| H | -8.5912260000 | -2.0136400000 | -0.8843450000 |
| H | -7.3218120000 | -2.9161170000 | -0.0026070000 |
| C | -7.1689820000 | 2.7601030000  | -0.0001990000 |
| H | -7.7785420000 | 2.9502940000  | -0.8862470000 |
| H | -7.7782710000 | 2.9503780000  | 0.8860190000  |
| H | -6.2900540000 | 3.4007300000  | -0.0003640000 |

Carbon (Set B):

|   |               |               |               |
|---|---------------|---------------|---------------|
| C | -3.0043290000 | -1.6921340000 | -0.0007810000 |
| C | -3.4548210000 | -0.3659460000 | -0.0005270000 |
| C | -2.5276720000 | 0.6826500000  | -0.0001290000 |
| C | -1.1768100000 | 0.3907560000  | -0.0000180000 |
| C | -0.7296670000 | -0.9406350000 | -0.0001390000 |
| C | -1.6491630000 | -1.9859760000 | -0.0005940000 |
| H | -3.7368080000 | -2.4903820000 | -0.0011970000 |
| H | -2.8849420000 | 1.7063890000  | 0.0001030000  |
| H | -1.3189810000 | -3.0199740000 | -0.0007890000 |
| C | 1.1768100000  | 0.3907560000  | -0.0002170000 |
| C | 2.5276710000  | 0.6826510000  | -0.0001310000 |
| C | 3.4548210000  | -0.3659450000 | 0.0003460000  |
| C | 3.0043290000  | -1.6921330000 | 0.0007160000  |
| C | 1.6491630000  | -1.9859760000 | 0.0005520000  |
| C | 0.7296670000  | -0.9406340000 | 0.0000120000  |
| H | 2.8849420000  | 1.7063900000  | -0.0004490000 |
| H | 3.7368080000  | -2.4903810000 | 0.0011960000  |
| H | 1.3189820000  | -3.0199740000 | 0.0008330000  |
| C | 4.9041970000  | -0.0740670000 | 0.0004970000  |
| N | 5.2616450000  | 1.2073740000  | 0.0022940000  |
| N | 7.0468230000  | -0.8157430000 | -0.0014250000 |

|   |               |               |               |
|---|---------------|---------------|---------------|
| C | 7.5601200000  | 0.4632760000  | 0.0001700000  |
| C | -4.9041970000 | -0.0740670000 | -0.0007130000 |
| N | -5.7316120000 | -1.1156260000 | 0.0015540000  |
| N | -6.5902340000 | 1.4423430000  | -0.0019470000 |
| C | -7.5601200000 | 0.4632750000  | -0.0002390000 |
| N | 5.7316110000  | -1.1156250000 | -0.0016740000 |
| N | 6.5902340000  | 1.4423440000  | 0.0017220000  |
| N | -7.0468230000 | -0.8157440000 | 0.0014270000  |
| N | -5.2616450000 | 1.2073730000  | -0.0024350000 |
| O | 8.7503630000  | 0.7040520000  | -0.0000980000 |
| O | -8.7503620000 | 0.7040530000  | 0.0007120000  |
| C | 7.9766940000  | -1.9272640000 | -0.0038820000 |
| H | 8.6119200000  | -1.8899280000 | -0.8915910000 |
| H | 8.6164310000  | -1.8897550000 | 0.8805260000  |
| H | 7.3810800000  | -2.8373000000 | -0.0023700000 |
| C | 7.0152350000  | 2.8277000000  | 0.0038400000  |
| H | 7.6153200000  | 3.0403350000  | 0.8913340000  |
| H | 7.6190550000  | 3.0416830000  | -0.8807460000 |
| H | 6.1129260000  | 3.4349760000  | 0.0024850000  |
| C | -7.9766940000 | -1.9272630000 | 0.0043050000  |
| H | -8.6116430000 | -1.8898410000 | 0.8922090000  |
| H | -8.6167070000 | -1.8898390000 | -0.8799060000 |
| H | -7.3810810000 | -2.8373000000 | 0.0027020000  |
| C | -7.0152350000 | 2.8277000000  | -0.0035270000 |
| H | -7.6176190000 | 3.0398520000  | -0.8895550000 |
| H | -7.6167580000 | 3.0421700000  | 0.8825270000  |
| H | -6.1129240000 | 3.4349720000  | -0.0047600000 |
| C | 0.0000000000  | 1.3298250000  | -0.0001580000 |
| H | -0.0001020000 | 1.9834100000  | -0.8805640000 |
| H | 0.0001020000  | 1.9834880000  | 0.8801890000  |

Nitrogen (Set B):

|   |               |               |               |
|---|---------------|---------------|---------------|
| C | -3.0324920000 | -1.7733060000 | -0.0000330000 |
| C | -3.4216330000 | -0.4204720000 | 0.0000920000  |
| C | -2.4636000000 | 0.5905420000  | 0.0002290000  |
| C | -1.1260450000 | 0.2198600000  | 0.0002360000  |
| C | -0.7201520000 | -1.1346680000 | 0.0001050000  |
| C | -1.6971400000 | -2.1315530000 | -0.0000220000 |
| H | -3.8030880000 | -2.5338540000 | -0.0001370000 |
| H | -2.7724910000 | 1.6292300000  | 0.0003350000  |
| H | -1.4159880000 | -3.1797580000 | -0.0001220000 |
| C | 1.1260400000  | 0.2198700000  | 0.0002500000  |
| C | 2.4635980000  | 0.5905460000  | 0.0002870000  |
| C | 3.4216320000  | -0.4204670000 | 0.0001920000  |
| C | 3.0324950000  | -1.7733020000 | 0.0000660000  |
| C | 1.6971420000  | -2.1315460000 | 0.0000320000  |
| C | 0.7201540000  | -1.1346640000 | 0.0001100000  |
| H | 2.7724840000  | 1.6292340000  | 0.0003990000  |
| H | 3.8030900000  | -2.5338510000 | 0.0000000000  |
| H | 1.4159870000  | -3.1797500000 | -0.0000650000 |
| C | 4.8574970000  | -0.0654580000 | 0.0002240000  |
| N | 5.1597240000  | 1.2308090000  | 0.0002080000  |
| N | 7.0301080000  | -0.7138860000 | 0.0000580000  |
| C | 7.4879890000  | 0.5854790000  | 0.0000160000  |
| C | -4.8574990000 | -0.0654700000 | 0.0000790000  |
| N | -5.7287390000 | -1.0695200000 | 0.0003040000  |
| N | -6.4773590000 | 1.5222540000  | -0.0000960000 |
| C | -7.4879900000 | 0.5854760000  | -0.0000990000 |
| N | 5.7287380000  | -1.0695220000 | 0.0000790000  |
| N | 6.4773700000  | 1.5222540000  | 0.0001240000  |
| N | -7.0301160000 | -0.7138820000 | -0.0001000000 |
| N | -5.1597210000 | 1.2308100000  | -0.0003140000 |

|   |               |               |               |
|---|---------------|---------------|---------------|
| O | 8.6669380000  | 0.8775280000  | -0.0004550000 |
| O | -8.6669340000 | 0.8775420000  | -0.0003250000 |
| C | 8.0059700000  | -1.7853930000 | -0.0004380000 |
| H | 8.6396370000  | -1.7225670000 | -0.8878050000 |
| H | 8.6430140000  | -1.7200360000 | 0.8842860000  |
| H | 7.4489810000  | -2.7195350000 | 0.0018770000  |
| C | 6.8431040000  | 2.9243640000  | -0.0000790000 |
| H | 7.4356520000  | 3.1633480000  | 0.8857590000  |
| H | 7.4353910000  | 3.1631740000  | -0.8861400000 |
| H | 5.9159170000  | 3.4928940000  | 0.0000020000  |
| C | -8.0059720000 | -1.7853920000 | 0.0002640000  |
| H | -8.6394750000 | -1.7228540000 | 0.8877750000  |
| H | -8.6431820000 | -1.7197610000 | -0.8843150000 |
| H | -7.4489810000 | -2.7195320000 | -0.0024400000 |
| C | -6.8431000000 | 2.9243630000  | -0.0007270000 |
| H | -7.4328520000 | 3.1636900000  | -0.8883640000 |
| H | -7.4381820000 | 3.1628190000  | 0.8835260000  |
| H | -5.9159210000 | 3.4928980000  | 0.0022450000  |
| N | -0.0000020000 | 1.0151000000  | 0.0003990000  |
| H | -0.0000290000 | 2.0198890000  | 0.0001040000  |

Oxygen (Set B):

|   |               |               |               |
|---|---------------|---------------|---------------|
| C | -3.0474330000 | -1.8283810000 | -0.0000600000 |
| C | -3.3927390000 | -0.4653390000 | -0.0000720000 |
| C | -2.4006900000 | 0.5167430000  | -0.0000610000 |
| C | -1.0911480000 | 0.0841460000  | -0.0000360000 |
| C | -0.7211960000 | -1.2679610000 | -0.0000210000 |
| C | -1.7248740000 | -2.2367800000 | -0.0000330000 |
| H | -3.8440860000 | -2.5618490000 | -0.0000690000 |
| H | -2.6555610000 | 1.5685980000  | -0.0000710000 |
| H | -1.4791590000 | -3.2934150000 | -0.0000240000 |

|   |               |               |               |
|---|---------------|---------------|---------------|
| C | 1.0911560000  | 0.0841420000  | 0.0000050000  |
| C | 2.4006980000  | 0.5167300000  | 0.0000250000  |
| C | 3.3927430000  | -0.4653590000 | 0.0000520000  |
| C | 3.0474310000  | -1.8283960000 | 0.0000530000  |
| C | 1.7248670000  | -2.2367880000 | 0.0000290000  |
| C | 0.7211970000  | -1.2679650000 | 0.0000060000  |
| H | 2.6555870000  | 1.5685820000  | 0.0000230000  |
| H | 3.8440750000  | -2.5618740000 | 0.0000720000  |
| H | 1.4791500000  | -3.2934230000 | 0.0000310000  |
| C | 4.8163390000  | -0.0636330000 | 0.0000740000  |
| N | 5.0730510000  | 1.2413370000  | 0.0002230000  |
| N | 7.0079450000  | -0.6390300000 | 0.0000670000  |
| C | 7.4210120000  | 0.6760530000  | 0.0000520000  |
| C | -4.8163330000 | -0.0636100000 | -0.0000960000 |
| N | -5.7197180000 | -1.0387000000 | 0.0000600000  |
| N | -6.3789350000 | 1.5783150000  | -0.0002510000 |
| C | -7.4210040000 | 0.6760840000  | -0.0000620000 |
| N | 5.7197170000  | -1.0387100000 | -0.0000930000 |
| N | 6.3788830000  | 1.5783190000  | 0.0000330000  |
| N | -7.0079050000 | -0.6390590000 | -0.0000930000 |
| N | -5.0730480000 | 1.2413460000  | -0.0002900000 |
| O | 8.5889500000  | 1.0073800000  | 0.0000720000  |
| O | -8.5889690000 | 1.0073150000  | 0.0001330000  |
| C | 8.0205150000  | -1.6760350000 | -0.0002200000 |
| H | 8.6517900000  | -1.5909620000 | -0.8874010000 |
| H | 8.6545710000  | -1.5884860000 | 0.8846980000  |
| H | 7.4966190000  | -2.6291260000 | 0.0018640000  |
| C | 6.6955820000  | 2.9927210000  | 0.0003480000  |
| H | 7.2772120000  | 3.2519220000  | 0.8876650000  |
| H | 7.2812180000  | 3.2512170000  | -0.8844960000 |
| H | 5.7491350000  | 3.5285300000  | -0.0019280000 |



|   |               |               |               |
|---|---------------|---------------|---------------|
| C | -8.0205040000 | -1.6760300000 | 0.0003540000  |
| H | -8.6516690000 | -1.5909130000 | 0.8876110000  |
| H | -8.6546710000 | -1.5884820000 | -0.8844840000 |
| H | -7.4966420000 | -2.6291400000 | -0.0017700000 |
| C | -6.6955900000 | 2.9927320000  | -0.0003070000 |
| H | -7.2793010000 | 3.2515410000  | -0.8863510000 |
| H | -7.2791270000 | 3.2516550000  | 0.8858190000  |
| H | -5.7491220000 | 3.5285060000  | -0.0004360000 |
| O | 0.0000050000  | 0.9055470000  | -0.0000200000 |

Sulphur (Set B):

|   |               |               |               |
|---|---------------|---------------|---------------|
| C | -2.9737090000 | -1.6693520000 | -0.0000370000 |
| C | -3.4874250000 | -0.3615500000 | -0.0000740000 |
| C | -2.6179930000 | 0.7257980000  | -0.0000790000 |
| C | -1.2499850000 | 0.4884860000  | -0.0000470000 |
| C | -0.7220050000 | -0.8159300000 | -0.0000060000 |
| C | -1.6113110000 | -1.8950770000 | -0.0000010000 |
| H | -3.6669030000 | -2.5013730000 | -0.0000340000 |
| H | -3.0180420000 | 1.7324520000  | -0.0001080000 |
| H | -1.2328980000 | -2.9122720000 | 0.0000290000  |
| C | 1.2499850000  | 0.4884860000  | 0.0000050000  |
| C | 2.6179930000  | 0.7257980000  | 0.0000230000  |
| C | 3.4874250000  | -0.3615500000 | 0.0000680000  |
| C | 2.9737080000  | -1.6693520000 | 0.0000890000  |
| C | 1.6113110000  | -1.8950770000 | 0.0000650000  |
| C | 0.7220050000  | -0.8159300000 | 0.0000230000  |
| H | 3.0180420000  | 1.7324520000  | 0.0000040000  |
| H | 3.6669030000  | -2.5013730000 | 0.0001230000  |
| H | 1.2328980000  | -2.9122720000 | 0.0000810000  |
| C | 4.9490360000  | -0.1364870000 | 0.0000920000  |
| N | 5.3644380000  | 1.1270920000  | 0.0001990000  |

|   |               |               |               |
|---|---------------|---------------|---------------|
| N | 7.0527980000  | -0.9776690000 | 0.0001740000  |
| C | 7.6247770000  | 0.2764860000  | 0.0000760000  |
| C | -4.9490350000 | -0.1364870000 | -0.0001070000 |
| N | -5.7250760000 | -1.2153760000 | -0.0000750000 |
| N | -6.7017880000 | 1.3005280000  | -0.0001700000 |
| C | -7.6247770000 | 0.2764850000  | -0.0000180000 |
| N | 5.7250770000  | -1.2153750000 | -0.0000280000 |
| N | 6.7017890000  | 1.3005280000  | -0.0000050000 |
| N | -7.0527990000 | -0.9776680000 | -0.0002530000 |
| N | -5.3644380000 | 1.1270920000  | -0.0002040000 |
| O | 8.8245660000  | 0.4614360000  | 0.0000220000  |
| O | -8.8245660000 | 0.4614370000  | 0.0001650000  |
| C | 7.9298650000  | -2.1315540000 | -0.0001420000 |
| H | 8.5663480000  | -2.1252580000 | -0.8876610000 |
| H | 8.5703080000  | -2.1224400000 | 0.8844530000  |
| H | 7.2925720000  | -3.0128700000 | 0.0025940000  |
| C | 7.1906490000  | 2.6650190000  | 0.0002320000  |
| H | 7.7997170000  | 2.8505460000  | 0.8875970000  |
| H | 7.8037630000  | 2.8491880000  | -0.8845850000 |
| H | 6.3176110000  | 3.3135970000  | -0.0021790000 |
| C | -7.9298640000 | -2.1315540000 | 0.0001230000  |
| H | -8.5662000000 | -2.1253300000 | 0.8877500000  |
| H | -8.5704550000 | -2.1223700000 | -0.8843630000 |
| H | -7.2925720000 | -3.0128700000 | -0.0027890000 |
| C | -7.1906500000 | 2.6650190000  | -0.0000960000 |
| H | -7.8019050000 | 2.8498510000  | -0.8860800000 |
| H | -7.8015800000 | 2.8498810000  | 0.8861070000  |
| H | -6.3176100000 | 3.3135980000  | -0.0002670000 |
| S | 0.0000000000  | 1.7149850000  | -0.0000480000 |

## Set-II diradicals

**B3LYP/6-311+G(d,p)**

B-ECP1

|   |               |               |               |
|---|---------------|---------------|---------------|
| C | -1.3819130000 | -1.3941330000 | -0.0098490000 |
| C | -1.5718470000 | -0.1125380000 | -0.5526360000 |
| C | -2.8420830000 | 0.4710860000  | -0.5632100000 |
| C | -3.9138400000 | -0.2037560000 | 0.0363020000  |
| C | -3.7650490000 | -1.4783090000 | 0.5910430000  |
| C | -2.4989670000 | -2.0673540000 | 0.5266060000  |
| C | 1.3820900000  | -1.3940220000 | 0.0093550000  |
| C | 1.5718770000  | -0.1125100000 | 0.5523620000  |
| C | 2.8420770000  | 0.4712150000  | 0.5632000000  |
| C | 3.9139580000  | -0.2034890000 | -0.0362530000 |
| C | 3.7653220000  | -1.4779790000 | -0.5911890000 |
| C | 2.4992660000  | -2.0670970000 | -0.5270580000 |
| H | -0.7228200000 | 0.4136220000  | -0.9627470000 |
| H | -4.8700980000 | 0.3012240000  | 0.0434840000  |
| H | -2.3475020000 | -3.0686070000 | 0.9086430000  |
| H | 0.7227720000  | 0.4135390000  | 0.9624500000  |
| H | 4.8701860000  | 0.3015470000  | -0.0432250000 |
| H | 2.3479060000  | -3.0682850000 | -0.9093050000 |
| C | 2.4074000000  | 2.3660310000  | 2.3146520000  |
| C | -2.4079420000 | 2.3661430000  | -2.3145930000 |
| N | -3.1047240000 | 1.7633250000  | -1.1088420000 |
| O | -4.0496780000 | 2.4409260000  | -0.5713510000 |
| O | 4.0497130000  | 2.4410260000  | 0.5720190000  |
| N | 3.1045440000  | 1.7633690000  | 1.1090650000  |
| H | 0.0001900000  | -3.2987550000 | -0.0005210000 |
| C | 4.9862640000  | -2.1736880000 | -1.2213470000 |
| C | 4.6469700000  | -3.5773070000 | -1.7551590000 |
| H | 5.5420240000  | -4.0275330000 | -2.1928490000 |
| H | 4.2981470000  | -4.2433430000 | -0.9611440000 |

|   |              |              |              |
|---|--------------|--------------|--------------|
| H | 3.881180000  | -3.542991000 | -2.534854000 |
| C | 6.104524000  | -2.317371000 | -0.162892000 |
| H | 6.977293000  | -2.811617000 | -0.600217000 |
| H | 6.429573000  | -1.347960000 | 0.221304000  |
| H | 5.764147000  | -2.917829000 | 0.685463000  |
| C | 5.503377000  | -1.318500000 | -2.401641000 |
| H | 4.733540000  | -1.208692000 | -3.170601000 |
| H | 5.797956000  | -0.317379000 | -2.079189000 |
| H | 6.376107000  | -1.793549000 | -2.860445000 |
| C | -4.985829000 | -2.174148000 | 1.221363000  |
| C | -6.104426000 | -2.317491000 | 0.163231000  |
| H | -6.977118000 | -2.811715000 | 0.600734000  |
| H | -6.429490000 | -1.347978000 | -0.220697000 |
| H | -5.764387000 | -2.917832000 | -0.685345000 |
| C | -4.646442000 | -3.577930000 | 1.754692000  |
| H | -4.297879000 | -4.243767000 | 0.960397000  |
| H | -3.880427000 | -3.543863000 | 2.534178000  |
| H | -5.541387000 | -4.028235000 | 2.192523000  |
| C | -5.502519000 | -1.319234000 | 2.402051000  |
| H | -5.797128000 | -0.318014000 | 2.079936000  |
| H | -6.375138000 | -1.794342000 | 2.861004000  |
| H | -4.732429000 | -1.209682000 | 3.170791000  |
| B | 0.000117000  | -2.100915000 | -0.000350000 |
| C | -2.089001000 | 1.281442000  | -3.357430000 |
| H | -1.712273000 | 1.766775000  | -4.261030000 |
| H | -1.335038000 | 0.568727000  | -3.027719000 |
| H | -2.990626000 | 0.724950000  | -3.624926000 |
| C | -1.140395000 | 3.106241000  | -1.848256000 |
| H | -0.684202000 | 3.625178000  | -2.695658000 |
| H | -1.397547000 | 3.849677000  | -1.090525000 |
| H | -0.391044000 | 2.432743000  | -1.430231000 |

|   |               |              |               |
|---|---------------|--------------|---------------|
| C | -3.3800350000 | 3.3772320000 | -2.9429980000 |
| H | -2.9080420000 | 3.8045080000 | -3.8310990000 |
| H | -4.3116390000 | 2.8933000000 | -3.2428100000 |
| H | -3.6249230000 | 4.1808080000 | -2.2511400000 |
| C | 1.1399750000  | 3.1061670000 | 1.8480370000  |
| H | 1.3973360000  | 3.8497690000 | 1.0905370000  |
| H | 0.3907840000  | 2.4327320000 | 1.4296310000  |
| H | 0.6834930000  | 3.6249110000 | 2.6954030000  |
| C | 3.3792940000  | 3.3770880000 | 2.9434340000  |
| H | 3.6245010000  | 4.1806530000 | 2.2516740000  |
| H | 2.9069530000  | 3.8043800000 | 3.8313390000  |
| H | 4.3107640000  | 2.8931290000 | 3.2436200000  |
| C | 2.0881540000  | 1.2812320000 | 3.3573150000  |
| H | 2.9896370000  | 0.7245230000 | 3.6248250000  |
| H | 1.7114330000  | 1.7665310000 | 4.2609350000  |
| H | 1.3340590000  | 0.5687240000 | 3.0274500000  |

#### B-ECP2

|   |               |               |               |
|---|---------------|---------------|---------------|
| C | -1.3307900000 | -2.7996590000 | -0.5504920000 |
| C | -1.8029070000 | -1.5524400000 | -0.1128640000 |
| C | -2.9994750000 | -1.0476070000 | -0.6312550000 |
| C | -3.6800460000 | -1.7376430000 | -1.6389490000 |
| C | -3.2167010000 | -2.9632000000 | -2.1258010000 |
| C | -2.0648710000 | -3.4910700000 | -1.5375710000 |
| C | 1.1718000000  | -2.8329720000 | 0.6539910000  |
| C | 1.7027180000  | -1.6518180000 | 0.1108420000  |
| C | 2.9514130000  | -1.1970750000 | 0.5410220000  |
| C | 3.6379260000  | -1.8665220000 | 1.5570140000  |
| C | 3.1189270000  | -3.0204010000 | 2.1520930000  |
| C | 1.9053120000  | -3.5024570000 | 1.6569300000  |
| H | -1.2849880000 | -1.0227430000 | 0.6767420000  |

|   |               |               |               |
|---|---------------|---------------|---------------|
| H | -4.6001810000 | -1.3005170000 | -2.0014140000 |
| H | -1.7089190000 | -4.4690490000 | -1.8347210000 |
| H | 1.1837930000  | -1.1406160000 | -0.6906560000 |
| H | 4.6049350000  | -1.4746770000 | 1.8418500000  |
| H | 1.4981550000  | -4.4296100000 | 2.0392360000  |
| C | 1.8029100000  | 1.5522850000  | -0.1129640000 |
| C | 1.3308030000  | 2.7995340000  | -0.5505210000 |
| C | 2.9994890000  | 1.0474800000  | -0.6313650000 |
| C | 2.0649120000  | 3.4910160000  | -1.5375310000 |
| C | -1.1718270000 | 2.8328650000  | 0.6539420000  |
| C | 3.6800910000  | 1.7375980000  | -1.6389900000 |
| C | 3.2167690000  | 2.9631940000  | -2.1257550000 |
| H | 1.7089690000  | 4.4690160000  | -1.8346200000 |
| C | -1.7027430000 | 1.6516610000  | 0.1108990000  |
| C | -1.9053480000 | 3.5024500000  | 1.6568100000  |
| H | 4.6002250000  | 1.3004830000  | -2.0014710000 |
| C | -2.9514460000 | 1.1969600000  | 0.5411110000  |
| H | -1.1838120000 | 1.1403860000  | -0.6905480000 |
| C | -3.1189710000 | 3.0204480000  | 2.1520040000  |
| H | -1.4981840000 | 4.4296340000  | 2.0390340000  |
| C | -3.6379650000 | 1.8665120000  | 1.5570360000  |
| H | -4.6049770000 | 1.4746950000  | 1.8418970000  |
| N | -3.6322610000 | 0.1147070000  | -0.0987720000 |
| H | 1.2849680000  | 1.0225390000  | 0.6765930000  |
| O | -4.9117810000 | 0.1886550000  | -0.1769950000 |
| O | 4.9117400000  | -0.1889850000 | -0.1773780000 |
| N | 3.6322390000  | -0.1148920000 | -0.0989870000 |
| H | -0.1565380000 | -4.7004760000 | 0.1625430000  |
| C | 3.9129200000  | -3.7193680000 | 3.2699220000  |
| C | 3.1783960000  | -4.9555790000 | 3.8201620000  |
| H | 3.7724990000  | -5.4063370000 | 4.6195250000  |

|   |               |               |               |
|---|---------------|---------------|---------------|
| H | 2.2025190000  | -4.6962730000 | 4.2399860000  |
| H | 3.0293760000  | -5.7194490000 | 3.0522510000  |
| C | 4.1323800000  | -2.7290450000 | 4.4371940000  |
| H | 4.6948290000  | -3.2124290000 | 5.2416680000  |
| H | 4.6947410000  | -1.8470730000 | 4.1223270000  |
| H | 3.1771840000  | -2.3895380000 | 4.8474410000  |
| C | 5.2838290000  | -4.1741970000 | 2.7173600000  |
| H | 5.1572650000  | -4.8829360000 | 1.8943380000  |
| H | 5.8726550000  | -3.3329950000 | 2.3449600000  |
| H | 5.8636820000  | -4.6662110000 | 3.5042680000  |
| C | -3.9992400000 | -3.6820000000 | -3.2392040000 |
| C | -4.0281120000 | -2.7839910000 | -4.4981330000 |
| H | -4.5831710000 | -3.2770080000 | -5.3020120000 |
| H | -4.5095710000 | -1.8236530000 | -4.3000290000 |
| H | -3.0150110000 | -2.5838540000 | -4.8583010000 |
| C | -3.3613580000 | -5.0299980000 | -3.6219090000 |
| H | -2.3393170000 | -4.9086510000 | -3.9910450000 |
| H | -3.3411550000 | -5.7257020000 | -2.7785100000 |
| H | -3.9463530000 | -5.4968750000 | -4.4187450000 |
| C | -5.4468400000 | -3.9491570000 | -2.7654030000 |
| H | -5.9760250000 | -3.0243670000 | -2.5253290000 |
| H | -6.0113180000 | -4.4621350000 | -3.5500110000 |
| H | -5.4558520000 | -4.5805360000 | -1.8726710000 |
| C | -3.9129820000 | 3.7195390000  | 3.2697450000  |
| C | -5.2838970000 | 4.1742680000  | 2.7171120000  |
| H | -5.8727050000 | 3.3329980000  | 2.3448320000  |
| H | -5.8637620000 | 4.6663870000  | 3.5039470000  |
| H | -5.1573400000 | 4.8828880000  | 1.8939870000  |
| C | -4.1324350000 | 2.7293680000  | 4.4371460000  |
| H | -3.1772380000 | 2.3899320000  | 4.8474480000  |
| H | -4.6948970000 | 3.2128550000  | 5.2415500000  |

|   |               |               |               |
|---|---------------|---------------|---------------|
| H | -4.6947820000 | 1.8473440000  | 4.1224000000  |
| C | -3.1784830000 | 4.9558340000  | 3.8198340000  |
| H | -2.2025870000 | 4.6966030000  | 4.2396570000  |
| H | -3.0295100000 | 5.7196280000  | 3.0518400000  |
| H | -3.7725790000 | 5.4066590000  | 4.6191650000  |
| C | 3.9993260000  | 3.6820760000  | -3.2390920000 |
| C | 4.0284090000  | 2.7840600000  | -4.4980120000 |
| H | 4.5835090000  | 3.2771200000  | -5.3018360000 |
| H | 4.5099320000  | 1.8237670000  | -4.2998440000 |
| H | 3.0153640000  | 2.5838300000  | -4.8582840000 |
| C | 5.4468540000  | 3.9494130000  | -2.7651740000 |
| H | 5.9761500000  | 3.0246890000  | -2.5250920000 |
| H | 6.0113220000  | 4.4624960000  | -3.5497200000 |
| H | 5.4557140000  | 4.5807630000  | -1.8724190000 |
| C | 3.3613170000  | 5.0299960000  | -3.6218580000 |
| H | 2.3393620000  | 4.9085150000  | -3.9911880000 |
| H | 3.3408540000  | 5.7256610000  | -2.7784330000 |
| H | 3.9463880000  | 5.4969920000  | -4.4185690000 |
| H | 0.1565240000  | 4.7003360000  | 0.1624650000  |
| B | -0.1094960000 | -3.5054080000 | 0.0957160000  |
| B | 0.1094840000  | 3.5052650000  | 0.0956600000  |

C-ECP1

|   |               |               |               |
|---|---------------|---------------|---------------|
| C | 0.9634160000  | 0.9356690000  | -1.1169830000 |
| C | 1.9576360000  | -0.0233690000 | -1.2864430000 |
| C | 3.1173690000  | 0.0171310000  | -0.4962150000 |
| C | 3.2537260000  | 1.0194600000  | 0.4696980000  |
| C | 2.2714700000  | 1.9981560000  | 0.6510680000  |
| C | 1.1307170000  | 1.9405480000  | -0.1553980000 |
| C | -1.5561030000 | 0.4177170000  | -1.2199590000 |
| C | -1.4840050000 | -0.5199280000 | -0.1935160000 |



|   |               |               |               |
|---|---------------|---------------|---------------|
| C | -2.6589820000 | -0.9842440000 | 0.4156110000  |
| C | -3.8993390000 | -0.5081440000 | -0.0275680000 |
| C | -3.9930250000 | 0.4369370000  | -1.0510690000 |
| C | -2.8053530000 | 0.8943030000  | -1.6333750000 |
| H | 1.8051880000  | -0.8061660000 | -2.0145770000 |
| H | 4.1521770000  | 1.0073800000  | 1.0700290000  |
| H | 0.3446950000  | 2.6765810000  | -0.0442830000 |
| H | -0.5162610000 | -0.8903000000 | 0.1046840000  |
| H | -4.7812320000 | -0.9008860000 | 0.4572690000  |
| H | -2.8357570000 | 1.6276880000  | -2.4294090000 |
| C | -1.5229410000 | -2.2447630000 | 2.4110630000  |
| C | 4.5345050000  | -1.7252720000 | -1.8420720000 |
| N | 4.1621320000  | -0.9481910000 | -0.5918100000 |
| O | 4.8811050000  | -1.1350520000 | 0.4512830000  |
| O | -3.7497790000 | -2.6245750000 | 1.6219510000  |
| N | -2.6678110000 | -1.9607910000 | 1.4539210000  |
| H | -0.4960200000 | 1.8766690000  | -2.3690400000 |
| C | -5.3818190000 | 0.9347680000  | -1.4938610000 |
| C | -5.2977210000 | 1.9850240000  | -2.6163560000 |
| H | -6.3056160000 | 2.3047370000  | -2.8942070000 |
| H | -4.7457290000 | 2.8751590000  | -2.3014810000 |
| H | -4.8209120000 | 1.5847140000  | -3.5153020000 |
| C | -6.1095850000 | 1.5761520000  | -0.2898090000 |
| H | -7.0983890000 | 1.9346280000  | -0.5924380000 |
| H | -6.2484320000 | 0.8647440000  | 0.5268650000  |
| H | -5.5438000000 | 2.4275200000  | 0.0989960000  |
| C | -6.2104050000 | -0.2628350000 | -2.0153930000 |
| H | -5.7213460000 | -0.7312880000 | -2.8741660000 |
| H | -6.3440000000 | -1.0298160000 | -1.2494080000 |
| H | -7.2032620000 | 0.0728770000  | -2.3309520000 |
| C | 2.4853010000  | 3.0927840000  | 1.7135110000  |

|   |               |               |               |
|---|---------------|---------------|---------------|
| C | 3.7715130000  | 3.8854280000  | 1.3833770000  |
| H | 3.9373040000  | 4.6657460000  | 2.1325810000  |
| H | 4.6535300000  | 3.2416460000  | 1.3711040000  |
| H | 3.6932690000  | 4.3663730000  | 0.4042510000  |
| C | 1.3114450000  | 4.0873760000  | 1.7732600000  |
| H | 1.1738270000  | 4.6128480000  | 0.8242130000  |
| H | 0.3705530000  | 3.5944670000  | 2.0326940000  |
| H | 1.5098910000  | 4.8411640000  | 2.5399980000  |
| C | 2.6326700000  | 2.4340450000  | 3.1049050000  |
| H | 3.4768960000  | 1.7421060000  | 3.1397090000  |
| H | 2.7944020000  | 3.1992210000  | 3.8704200000  |
| H | 1.7308180000  | 1.8747660000  | 3.3690620000  |
| C | -0.3009760000 | 0.8840400000  | -1.9507560000 |
| H | -0.1340590000 | 0.2244670000  | -2.8104700000 |
| C | -2.1091680000 | -3.0004810000 | 3.6132720000  |
| H | -2.5384180000 | -3.9563160000 | 3.3177960000  |
| H | -1.3039460000 | -3.1799020000 | 4.3300430000  |
| H | -2.8905000000 | -2.4183520000 | 4.1043320000  |
| C | -0.4844950000 | -3.1492780000 | 1.7186080000  |
| H | 0.0250580000  | -2.6589810000 | 0.8892010000  |
| H | 0.2772590000  | -3.4489100000 | 2.4432610000  |
| H | -0.9682650000 | -4.0522980000 | 1.3391710000  |
| C | -0.9056670000 | -0.9296110000 | 2.9186020000  |
| H | -0.4239830000 | -0.3431550000 | 2.1388630000  |
| H | -1.6708370000 | -0.3080100000 | 3.3904100000  |
| H | -0.1492770000 | -1.1647530000 | 3.6714010000  |
| C | 4.4638190000  | -0.8191560000 | -3.0833490000 |
| H | 3.4557920000  | -0.4852420000 | -3.3218290000 |
| H | 5.0913450000  | 0.0650010000  | -2.9478700000 |
| H | 4.8435750000  | -1.3735650000 | -3.9451240000 |
| C | 3.6175290000  | -2.9575630000 | -1.9680150000 |

|   |              |               |               |
|---|--------------|---------------|---------------|
| H | 3.9489120000 | -3.5773950000 | -2.8056650000 |
| H | 3.6696950000 | -3.5591020000 | -1.0578120000 |
| H | 2.5739450000 | -2.6936650000 | -2.1431720000 |
| C | 5.9857410000 | -2.1996520000 | -1.6699550000 |
| H | 6.2821400000 | -2.7358230000 | -2.5748940000 |
| H | 6.6619420000 | -1.3548480000 | -1.5281500000 |
| H | 6.0933260000 | -2.8632900000 | -0.8140560000 |

C-ECP2

|   |               |               |               |
|---|---------------|---------------|---------------|
| C | -2.8318280000 | -1.1531960000 | -1.3167010000 |
| C | -2.3484510000 | -0.0600510000 | -0.6063270000 |
| C | -3.1195730000 | 1.1054290000  | -0.5224900000 |
| C | -4.3765460000 | 1.1710860000  | -1.1213050000 |
| C | -4.8847290000 | 0.0803880000  | -1.8351490000 |
| C | -4.0934640000 | -1.0699120000 | -1.9230750000 |
| C | -0.9741390000 | -2.6852420000 | -0.4075020000 |
| C | 0.3552850000  | -2.3246840000 | -0.6040290000 |
| C | 1.2918310000  | -2.5563000000 | 0.4105860000  |
| C | 0.9072110000  | -3.1713860000 | 1.6003330000  |
| C | -0.4243090000 | -3.5435030000 | 1.8184880000  |
| C | -1.3497250000 | -3.2851540000 | 0.8022650000  |
| H | -1.3975480000 | -0.1195890000 | -0.0962140000 |
| H | -4.9420740000 | 2.0847520000  | -1.0023020000 |
| H | -4.4546500000 | -1.9339370000 | -2.4667250000 |
| H | 0.6672390000  | -1.8863340000 | -1.5438060000 |
| H | 1.6738340000  | -3.3554360000 | 2.3403440000  |
| H | -2.3897210000 | -3.5546880000 | 0.9342670000  |
| C | 2.3485710000  | 0.0601920000  | -0.6061390000 |
| C | 2.8319540000  | 1.1532630000  | -1.3166190000 |
| C | 3.1196400000  | -1.1053210000 | -0.5222760000 |
| C | 4.0935420000  | 1.0698620000  | -1.9230820000 |

|   |               |               |               |
|---|---------------|---------------|---------------|
| C | 0.9742610000  | 2.6853550000  | -0.4075040000 |
| C | 4.3765620000  | -1.1710910000 | -1.1211670000 |
| C | 4.8847520000  | -0.0804710000 | -1.8351340000 |
| H | 4.4547400000  | 1.9338300000  | -2.4668150000 |
| C | -0.3551570000 | 2.3248420000  | -0.6041630000 |
| C | 1.3497550000  | 3.2852000000  | 0.8023230000  |
| H | 4.9420610000  | -2.0847730000 | -1.0021280000 |
| C | -1.2917790000 | 2.5564310000  | 0.4103840000  |
| H | -0.6670460000 | 1.8865420000  | -1.5439860000 |
| C | 0.4242630000  | 3.5435170000  | 1.8184850000  |
| H | 2.3897460000  | 3.5547060000  | 0.9344210000  |
| C | -0.9072480000 | 3.1714430000  | 1.6001950000  |
| H | -1.6739310000 | 3.3554820000  | 2.3401480000  |
| N | -2.6719980000 | 2.2319310000  | 0.2322120000  |
| H | 1.3977070000  | 0.1198030000  | -0.0959590000 |
| O | -3.5495430000 | 2.9833710000  | 0.7894470000  |
| O | 3.5495870000  | -2.9830410000 | 0.7899790000  |
| N | 2.6720450000  | -2.2317390000 | 0.2325540000  |
| H | 2.6948280000  | 3.2781980000  | -1.5365720000 |
| H | -2.6945540000 | -3.2781080000 | -1.5367980000 |
| C | -0.8134450000 | -4.2099540000 | 3.1508060000  |
| C | -2.3150680000 | -4.5415860000 | 3.2235210000  |
| H | -2.5392670000 | -5.0079280000 | 4.1865410000  |
| H | -2.9359420000 | -3.6453930000 | 3.1398670000  |
| H | -2.6163900000 | -5.2433900000 | 2.4409040000  |
| C | -0.4737900000 | -3.2550720000 | 4.3191910000  |
| H | -0.7419040000 | -3.7173660000 | 5.2741260000  |
| H | 0.5914000000  | -3.0158930000 | 4.3519980000  |
| H | -1.0264310000 | -2.3156640000 | 4.2297750000  |
| C | -0.0181270000 | -5.5261020000 | 3.3160320000  |
| H | -0.2432010000 | -6.2228930000 | 2.5038530000  |

|   |               |               |               |
|---|---------------|---------------|---------------|
| H | 1.0602440000  | -5.3530550000 | 3.3177210000  |
| H | -0.2812010000 | -6.0099330000 | 4.2617170000  |
| C | -6.2744930000 | 0.1890770000  | -2.4893910000 |
| C | -6.2606470000 | 1.3359980000  | -3.5272190000 |
| H | -7.2426650000 | 1.4298770000  | -4.0011510000 |
| H | -6.0189580000 | 2.2964510000  | -3.0667200000 |
| H | -5.5223190000 | 1.1448390000  | -4.3111770000 |
| C | -6.6880470000 | -1.1065640000 | -3.2106330000 |
| H | -5.9981040000 | -1.3632200000 | -4.0192780000 |
| H | -6.7446440000 | -1.9555990000 | -2.5237150000 |
| H | -7.6788240000 | -0.9762850000 | -3.6540100000 |
| C | -7.3319380000 | 0.4935720000  | -1.4027990000 |
| H | -7.1253060000 | 1.4314620000  | -0.8832330000 |
| H | -8.3250550000 | 0.5737340000  | -1.8554140000 |
| H | -7.3624560000 | -0.3030690000 | -0.6543970000 |
| C | 0.8133000000  | 4.2099120000  | 3.1508590000  |
| C | 0.0179430000  | 5.5260370000  | 3.3160880000  |
| H | -1.0604240000 | 5.3529670000  | 3.3177010000  |
| H | 0.2809470000  | 6.0098360000  | 4.2618090000  |
| H | 0.2430540000  | 6.2228650000  | 2.5039520000  |
| C | 0.4735900000  | 3.2549740000  | 4.3191820000  |
| H | 1.0262490000  | 2.3155770000  | 4.2297550000  |
| H | 0.7416470000  | 3.7172290000  | 5.2741520000  |
| H | -0.5915980000 | 3.0157810000  | 4.3519220000  |
| C | 2.3149120000  | 4.5415700000  | 3.2236880000  |
| H | 2.9358070000  | 3.6453920000  | 3.1400300000  |
| H | 2.6162730000  | 5.2434200000  | 2.4411260000  |
| H | 2.5390390000  | 5.0078680000  | 4.1867460000  |
| C | 6.2744710000  | -0.1892730000 | -2.4894530000 |
| C | 6.2604640000  | -1.3361820000 | -3.5272960000 |
| H | 7.2424450000  | -1.4301430000 | -4.0012870000 |

|   |               |               |               |
|---|---------------|---------------|---------------|
| H | 6.0187150000  | -2.2966170000 | -3.0667910000 |
| H | 5.5221050000  | -1.1449450000 | -4.3112060000 |
| C | 7.3319500000  | -0.4938770000 | -1.4029270000 |
| H | 7.1252670000  | -1.4317520000 | -0.8833520000 |
| H | 8.3250320000  | -0.5741280000 | -1.8556030000 |
| H | 7.3625890000  | 0.3027540000  | -0.6545180000 |
| C | 6.6881040000  | 1.1063380000  | -3.2107000000 |
| H | 5.9981520000  | 1.3630600000  | -4.0193170000 |
| H | 6.7447980000  | 1.9553620000  | -2.5237760000 |
| H | 7.6788520000  | 0.9759820000  | -3.6541180000 |
| C | -2.0081410000 | -2.4276340000 | -1.4836660000 |
| C | 2.0083570000  | 2.4277630000  | -1.4835790000 |
| H | -1.5051160000 | -2.3853960000 | -2.4569540000 |
| H | 1.5054380000  | 2.3856300000  | -2.4569260000 |

#### N-ECP1

|   |               |               |               |
|---|---------------|---------------|---------------|
| C | -1.2088740000 | -1.3324730000 | -0.0094100000 |
| C | -1.4365560000 | 0.0043130000  | 0.3300340000  |
| C | -2.7220380000 | 0.5277180000  | 0.2032800000  |
| C | -3.7758520000 | -0.2531490000 | -0.2656540000 |
| C | -3.5711350000 | -1.5997300000 | -0.5937860000 |
| C | -2.2828840000 | -2.1189860000 | -0.4616980000 |
| C | 1.3192960000  | -1.3456480000 | 0.0282240000  |
| C | 1.5534340000  | -0.1945320000 | -0.7275230000 |
| C | 2.8556810000  | 0.2985050000  | -0.8262220000 |
| C | 3.9213120000  | -0.3618460000 | -0.2166930000 |
| C | 3.7056930000  | -1.5245360000 | 0.5338170000  |
| C | 2.3970370000  | -1.9913750000 | 0.6581730000  |
| H | -0.6284010000 | 0.6261350000  | 0.6839130000  |
| H | -4.7439580000 | 0.2142610000  | -0.3816460000 |
| H | -2.0787850000 | -3.1486770000 | -0.7273910000 |

|   |               |               |               |
|---|---------------|---------------|---------------|
| H | 0.7500860000  | 0.2702340000  | -1.2792430000 |
| H | 4.9145550000  | 0.0404450000  | -0.3599010000 |
| H | 2.1822700000  | -2.8747130000 | 1.2459580000  |
| C | 2.6953620000  | 2.8572160000  | -1.3604890000 |
| C | -3.0375780000 | 2.4704680000  | 1.9134340000  |
| N | -2.9736480000 | 1.9163780000  | 0.5036980000  |
| O | -3.6287060000 | 2.5736130000  | -0.3831200000 |
| O | 4.1819410000  | 1.3395860000  | -2.4071850000 |
| N | 3.1484500000  | 1.4393510000  | -1.6536440000 |
| N | 0.0478240000  | -1.9319310000 | 0.1301880000  |
| H | 0.0417630000  | -2.9369650000 | 0.2022430000  |
| C | 4.9030240000  | -2.2324590000 | 1.1949490000  |
| C | 4.4830250000  | -3.4779660000 | 1.9963060000  |
| H | 5.3679900000  | -3.9394760000 | 2.4424770000  |
| H | 3.7968320000  | -3.2281360000 | 2.8104910000  |
| H | 4.0061810000  | -4.2301930000 | 1.3617300000  |
| C | 5.6097820000  | -1.2544290000 | 2.1621830000  |
| H | 6.4658270000  | -1.7442130000 | 2.6365160000  |
| H | 5.9788430000  | -0.3670430000 | 1.6436700000  |
| H | 4.9281420000  | -0.9234070000 | 2.9508430000  |
| C | 5.8977540000  | -2.6767580000 | 0.0971600000  |
| H | 5.4232630000  | -3.3726690000 | -0.6001390000 |
| H | 6.2692740000  | -1.8286750000 | -0.4815250000 |
| H | 6.7591300000  | -3.1800350000 | 0.5474520000  |
| C | -4.7535300000 | -2.4422970000 | -1.1078220000 |
| C | -5.2777300000 | -1.8289960000 | -2.4273940000 |
| H | -6.1225190000 | -2.4130300000 | -2.8054470000 |
| H | -5.6154660000 | -0.7995600000 | -2.2907280000 |
| H | -4.4969010000 | -1.8251310000 | -3.1926990000 |
| C | -4.3611930000 | -3.9060710000 | -1.3795200000 |
| H | -3.5936050000 | -3.9874510000 | -2.1539760000 |

|   |               |               |               |
|---|---------------|---------------|---------------|
| H | -3.9961710000 | -4.4049110000 | -0.4771460000 |
| H | -5.2373050000 | -4.4589830000 | -1.7288390000 |
| C | -5.8863210000 | -2.4377850000 | -0.0551500000 |
| H | -6.2535750000 | -1.4286100000 | 0.1429630000  |
| H | -6.7316100000 | -3.0360960000 | -0.4087100000 |
| H | -5.5425340000 | -2.8623540000 | 0.8922990000  |
| C | 1.4254160000  | 2.8996250000  | -0.5058520000 |
| H | 0.5626940000  | 2.4786600000  | -1.0242690000 |
| H | 1.5552620000  | 2.3826750000  | 0.4467040000  |
| H | 1.1964990000  | 3.9460950000  | -0.2899780000 |
| C | 2.4430090000  | 3.5381120000  | -2.7130650000 |
| H | 2.1758780000  | 4.5858500000  | -2.5537340000 |
| H | 3.3344400000  | 3.4920940000  | -3.3379730000 |
| H | 1.6214010000  | 3.0513220000  | -3.2447140000 |
| C | 3.8497280000  | 3.5483000000  | -0.6095620000 |
| H | 4.7663750000  | 3.5002240000  | -1.1985970000 |
| H | 3.6019740000  | 4.5976310000  | -0.4292300000 |
| H | 4.0286780000  | 3.0692690000  | 0.3571670000  |
| C | -2.1375930000 | 1.6885580000  | 2.8755270000  |
| H | -2.4019930000 | 0.6310520000  | 2.9223410000  |
| H | -1.0822010000 | 1.7723820000  | 2.6094500000  |
| H | -2.2593990000 | 2.1094750000  | 3.8767080000  |
| C | -4.5049000000 | 2.3755980000  | 2.3730490000  |
| H | -4.6169400000 | 2.8240500000  | 3.3637400000  |
| H | -5.1536820000 | 2.9050280000  | 1.6737590000  |
| H | -4.8297220000 | 1.3333230000  | 2.4336510000  |
| C | -2.5874110000 | 3.9360270000  | 1.8425850000  |
| H | -2.6713210000 | 4.3950770000  | 2.8310000000  |
| H | -1.5459580000 | 4.0056870000  | 1.5178600000  |
| H | -3.2053330000 | 4.4947720000  | 1.1404140000  |



## N-ECP2

|   |               |               |               |
|---|---------------|---------------|---------------|
| C | 0.3139060000  | 2.9785510000  | 0.1296170000  |
| C | -0.7805670000 | 2.1619350000  | -0.1502130000 |
| C | -1.9235810000 | 2.2720970000  | 0.6483600000  |
| C | -1.9732240000 | 3.1882250000  | 1.7037010000  |
| C | -0.8820750000 | 4.0110850000  | 1.9911780000  |
| C | 0.2617070000  | 3.8873360000  | 1.1950370000  |
| C | 2.3097000000  | 1.8687300000  | -0.9116260000 |
| C | 2.1897350000  | 0.6737180000  | -0.2002440000 |
| C | 3.1323530000  | -0.3337730000 | -0.4230130000 |
| C | 4.1779880000  | -0.1705240000 | -1.3260560000 |
| C | 4.3003640000  | 1.0192180000  | -2.0560290000 |
| C | 3.3549900000  | 2.0201330000  | -1.8422770000 |
| H | -0.7593230000 | 1.5059920000  | -1.0092220000 |
| H | -2.8910400000 | 3.2464820000  | 2.2705340000  |
| H | 1.1376630000  | 4.4925230000  | 1.3889190000  |
| H | 1.4211310000  | 0.5519430000  | 0.5499820000  |
| H | 4.8887060000  | -0.9777610000 | -1.4308040000 |
| H | 3.4055380000  | 2.9507800000  | -2.3934300000 |
| C | 0.7805430000  | -2.1619300000 | -0.1496780000 |
| C | -0.3139660000 | -2.9785220000 | 0.1300930000  |
| C | 1.9234320000  | -2.2719700000 | 0.6490900000  |
| C | -0.2619210000 | -3.8871590000 | 1.1956470000  |
| C | -2.3095690000 | -1.8688640000 | -0.9116990000 |
| C | 1.9729170000  | -3.1879440000 | 1.7045720000  |
| C | 0.8817330000  | -4.0107780000 | 1.9919900000  |
| H | -1.1378990000 | -4.4923330000 | 1.3894730000  |
| C | -2.1897420000 | -0.6737310000 | -0.2004960000 |
| C | -3.3546720000 | -2.0204180000 | -1.8425360000 |
| H | 2.8906430000  | -3.2461100000 | 2.2715590000  |
| C | -3.1323100000 | 0.3337250000  | -0.4236260000 |

|   |               |               |               |
|---|---------------|---------------|---------------|
| H | -1.4212840000 | -0.5518250000 | 0.5498590000  |
| C | -4.3000060000 | -1.0195390000 | -2.0566380000 |
| H | -3.4051080000 | -2.9511560000 | -2.3935450000 |
| C | -4.1777680000 | 0.1703270000  | -1.3268460000 |
| H | -4.8884650000 | 0.9775480000  | -1.4318700000 |
| N | -3.1081280000 | 1.5403500000  | 0.3507810000  |
| H | 0.7594290000  | -1.5061090000 | -1.0087840000 |
| O | -4.2333750000 | 2.0121970000  | 0.7459590000  |
| O | 4.2332090000  | -2.0120570000 | 0.7470290000  |
| N | 3.1080300000  | -1.5402660000 | 0.3515920000  |
| N | 1.4491190000  | 2.9590110000  | -0.7152540000 |
| N | -1.4490490000 | -2.9591230000 | -0.7149480000 |
| H | -1.8962220000 | -3.8565600000 | -0.8273900000 |
| H | 1.8963020000  | 3.8564340000  | -0.8277800000 |
| C | 5.4555060000  | 1.1721410000  | -3.0623470000 |
| C | 5.4334060000  | 2.5330310000  | -3.7814210000 |
| H | 6.2697080000  | 2.5886700000  | -4.4833540000 |
| H | 4.5132250000  | 2.6771900000  | -4.3545260000 |
| H | 5.5375890000  | 3.3662430000  | -3.0807620000 |
| C | 5.3522790000  | 0.0598960000  | -4.1316640000 |
| H | 6.1683560000  | 0.1534520000  | -4.8548480000 |
| H | 5.4120260000  | -0.9362270000 | -3.6882360000 |
| H | 4.4061750000  | 0.1285860000  | -4.6758740000 |
| C | 6.8028990000  | 1.0421810000  | -2.3141950000 |
| H | 6.9039900000  | 1.8214680000  | -1.5537540000 |
| H | 6.8994200000  | 0.0757060000  | -1.8152440000 |
| H | 7.6359760000  | 1.1421150000  | -3.0168530000 |
| C | -0.9683750000 | 4.9996290000  | 3.1685290000  |
| C | -1.2008110000 | 4.2118960000  | 4.4791710000  |
| H | -1.2688260000 | 4.9008580000  | 5.3266690000  |
| H | -2.1254610000 | 3.6318770000  | 4.4445940000  |

|   |               |               |               |
|---|---------------|---------------|---------------|
| H | -0.3766180000 | 3.5188890000  | 4.6699730000  |
| C | 0.3158070000  | 5.8333410000  | 3.3301230000  |
| H | 1.1886020000  | 5.2058380000  | 3.5309050000  |
| H | 0.5230600000  | 6.4393190000  | 2.4435370000  |
| H | 0.2028610000  | 6.5172910000  | 4.1754370000  |
| C | -2.1490810000 | 5.9713390000  | 2.9375870000  |
| H | -3.1019600000 | 5.4437420000  | 2.8603980000  |
| H | -2.2235650000 | 6.6778200000  | 3.7699320000  |
| H | -2.0090890000 | 6.5445850000  | 2.0168940000  |
| C | -5.4549510000 | -1.1726210000 | -3.0631560000 |
| C | -6.8024840000 | -1.0426060000 | -2.3152640000 |
| H | -6.8990960000 | -0.0760890000 | -1.8164110000 |
| H | -7.6354300000 | -1.1425980000 | -3.0180680000 |
| H | -6.9037120000 | -1.8218310000 | -1.5547780000 |
| C | -5.3515580000 | -0.0604950000 | -4.1325780000 |
| H | -4.4053710000 | -0.1292450000 | -4.6766360000 |
| H | -6.1675240000 | -0.1541310000 | -4.8558780000 |
| H | -5.4113760000 | 0.9356760000  | -3.6892680000 |
| C | -5.4326800000 | -2.5335960000 | -3.7820720000 |
| H | -4.5123870000 | -2.6777950000 | -4.3549860000 |
| H | -5.5369750000 | -3.3667320000 | -3.0813400000 |
| H | -6.2688470000 | -2.5893360000 | -4.4841570000 |
| C | 0.9678630000  | -4.9991640000 | 3.1694870000  |
| C | 1.2001100000  | -4.2112590000 | 4.4800580000  |
| H | 1.2680160000  | -4.9001120000 | 5.3276530000  |
| H | 2.1247590000  | -3.6312370000 | 4.4455370000  |
| H | 0.3758850000  | -3.5182370000 | 4.6706590000  |
| C | 2.1486050000  | -5.9709000000 | 2.9388390000  |
| H | 3.1014920000  | -5.4433090000 | 2.8617170000  |
| H | 2.2229720000  | -6.6772730000 | 3.7712870000  |
| H | 2.0087450000  | -6.5442650000 | 2.0182000000  |

|   |               |               |              |
|---|---------------|---------------|--------------|
| C | -0.3163410000 | -5.8328570000 | 3.3310090000 |
| H | -1.1891690000 | -5.2053270000 | 3.5315670000 |
| H | -0.5234590000 | -6.4389690000 | 2.4444840000 |
| H | -0.2035190000 | -6.5166810000 | 4.1764430000 |

O-ECP1

|   |               |               |               |
|---|---------------|---------------|---------------|
| C | -1.1097420000 | -1.3567530000 | 0.1294580000  |
| C | -1.3490110000 | -0.1100410000 | 0.6951580000  |
| C | -2.6058960000 | 0.4682520000  | 0.5107410000  |
| C | -3.5855520000 | -0.1838500000 | -0.2382250000 |
| C | -3.3488180000 | -1.4447460000 | -0.7990110000 |
| C | -2.0914820000 | -2.0240640000 | -0.6005620000 |
| C | 1.2914250000  | -1.3613000000 | 0.1535190000  |
| C | 1.4818350000  | -0.4229480000 | -0.8537160000 |
| C | 2.7548270000  | 0.1319230000  | -1.0064770000 |
| C | 3.8099470000  | -0.2748390000 | -0.1896580000 |
| C | 3.6193590000  | -1.2274570000 | 0.8187140000  |
| C | 2.3378960000  | -1.7597870000 | 0.9847850000  |
| H | -0.5698620000 | 0.4018010000  | 1.2408620000  |
| H | -4.5292060000 | 0.3248940000  | -0.3813940000 |
| H | -1.8382490000 | -2.9930290000 | -1.0071680000 |
| H | 0.6748010000  | -0.1652500000 | -1.5233640000 |
| H | 4.7835210000  | 0.1570120000  | -0.3764490000 |
| H | 2.1203430000  | -2.5013480000 | 1.7406160000  |
| C | 2.4632890000  | 2.4611670000  | -2.1642930000 |
| C | -3.0723720000 | 2.0860180000  | 2.5024470000  |
| N | -2.8960120000 | 1.7824120000  | 1.0256080000  |
| O | -3.5034700000 | 2.5768550000  | 0.2213560000  |
| O | 4.1378360000  | 0.8724500000  | -2.7005020000 |
| N | 3.0350620000  | 1.0573390000  | -2.0715780000 |

|   |               |               |               |
|---|---------------|---------------|---------------|
| C | 4.8099240000  | -1.6555980000 | 1.6958960000  |
| C | 4.4051040000  | -2.6826380000 | 2.7688230000  |
| H | 5.2810030000  | -2.9526370000 | 3.3648060000  |
| H | 3.6518270000  | -2.2827250000 | 3.4535190000  |
| H | 4.0133190000  | -3.6021010000 | 2.3256980000  |
| C | 5.3976600000  | -0.4171390000 | 2.4112460000  |
| H | 6.2433790000  | -0.7112160000 | 3.0403290000  |
| H | 5.7553920000  | 0.3310780000  | 1.7007140000  |
| H | 4.6482630000  | 0.0575510000  | 3.0510410000  |
| C | 5.8957310000  | -2.2945920000 | 0.7988880000  |
| H | 5.5065710000  | -3.1780700000 | 0.2855410000  |
| H | 6.2561110000  | -1.5992780000 | 0.0376930000  |
| H | 6.7529560000  | -2.6035700000 | 1.4050550000  |
| C | -4.4581720000 | -2.1396230000 | -1.6095440000 |
| C | -4.8493290000 | -1.2481140000 | -2.8109310000 |
| H | -5.6427320000 | -1.7274700000 | -3.3922880000 |
| H | -5.2136190000 | -0.2694950000 | -2.4913420000 |
| H | -3.9935720000 | -1.0868290000 | -3.4721170000 |
| C | -4.0139350000 | -3.5103830000 | -2.1513020000 |
| H | -3.1574040000 | -3.4241220000 | -2.8254140000 |
| H | -3.7497580000 | -4.2021880000 | -1.3468350000 |
| H | -4.8331540000 | -3.9615560000 | -2.7172620000 |
| C | -5.6948060000 | -2.3547460000 | -0.7059840000 |
| H | -6.0895600000 | -1.4100420000 | -0.3255970000 |
| H | -6.4929380000 | -2.8467220000 | -1.2703330000 |
| H | -5.4475170000 | -2.9856450000 | 0.1524350000  |
| C | 1.1030620000  | 2.5868250000  | -1.4723810000 |
| H | 0.3338620000  | 1.9811960000  | -1.9541310000 |
| H | 1.1503580000  | 2.3193660000  | -0.4157260000 |
| H | 0.7824390000  | 3.6293060000  | -1.5369770000 |
| C | 2.3270580000  | 2.7921760000  | -3.6568270000 |

|   |               |               |               |
|---|---------------|---------------|---------------|
| H | 1.9786750000  | 3.8213460000  | -3.7742310000 |
| H | 3.2849690000  | 2.6837260000  | -4.1644470000 |
| H | 1.6038790000  | 2.1276440000  | -4.1365880000 |
| C | 3.4804620000  | 3.4002690000  | -1.4882000000 |
| H | 4.4591980000  | 3.3000730000  | -1.9592670000 |
| H | 3.1495170000  | 4.4378450000  | -1.5817870000 |
| H | 3.5779960000  | 3.1690410000  | -0.4237360000 |
| C | -2.1851500000 | 1.2002000000  | 3.3828420000  |
| H | -2.3896460000 | 0.1376270000  | 3.2440550000  |
| H | -1.1229930000 | 1.3804780000  | 3.2046950000  |
| H | -2.3888820000 | 1.4450710000  | 4.4281480000  |
| C | -4.5559240000 | 1.8422490000  | 2.8384840000  |
| H | -4.7509660000 | 2.1054540000  | 3.8813490000  |
| H | -5.1934960000 | 2.4541080000  | 2.1984120000  |
| H | -4.8221390000 | 0.7910480000  | 2.6984110000  |
| C | -2.7059090000 | 3.5620930000  | 2.7060660000  |
| H | -2.8690970000 | 3.8381260000  | 3.7509030000  |
| H | -1.6544850000 | 3.7371670000  | 2.4637830000  |
| H | -3.3167380000 | 4.2035360000  | 2.0721370000  |
| O | 0.0875560000  | -2.0224010000 | 0.3239320000  |

O-ECP2

|   |               |               |               |
|---|---------------|---------------|---------------|
| C | -2.6312180000 | -1.3147000000 | -0.9061720000 |
| C | -2.2770930000 | -0.1765120000 | -0.1877840000 |
| C | -2.9501430000 | 1.0119530000  | -0.4780330000 |
| C | -3.9579750000 | 1.0680260000  | -1.4414520000 |
| C | -4.3028270000 | -0.0754700000 | -2.1668570000 |
| C | -3.6198550000 | -1.2646360000 | -1.8879070000 |
| C | -1.0023530000 | -2.7336180000 | 0.1664990000  |
| C | 0.2554110000  | -2.2688380000 | -0.2033950000 |
| C | 1.3363870000  | -2.5856890000 | 0.6212470000  |

|   |               |               |               |
|---|---------------|---------------|---------------|
| C | 1.1603980000  | -3.3605390000 | 1.7752330000  |
| C | -0.1034220000 | -3.8186760000 | 2.1426820000  |
| C | -1.1909370000 | -3.4870400000 | 1.3173530000  |
| H | -1.5333510000 | -0.2166910000 | 0.5949250000  |
| H | -4.4535470000 | 2.0143040000  | -1.5953500000 |
| H | -3.8476360000 | -2.1836920000 | -2.4127220000 |
| H | 0.3877080000  | -1.7172350000 | -1.1240700000 |
| H | 2.0412520000  | -3.5933750000 | 2.3535940000  |
| H | -2.1952210000 | -3.8224650000 | 1.5424390000  |
| C | 2.2770950000  | 0.1764690000  | -0.1877680000 |
| C | 2.6312500000  | 1.3146640000  | -0.9061280000 |
| C | 2.9501640000  | -1.0119900000 | -0.4779980000 |
| C | 3.6199300000  | 1.2646130000  | -1.8878210000 |
| C | 1.0023640000  | 2.7335860000  | 0.1665140000  |
| C | 3.9580340000  | -1.0680520000 | -1.4413780000 |
| C | 4.3029100000  | 0.0754510000  | -2.1667620000 |
| H | 3.8477330000  | 2.1836760000  | -2.4126150000 |
| C | -0.2553900000 | 2.2687770000  | -0.2033820000 |
| C | 1.1909250000  | 3.4870460000  | 1.3173470000  |
| H | 4.4536290000  | -2.0143230000 | -1.5952450000 |
| C | -1.3363800000 | 2.5856530000  | 0.6212320000  |
| H | -0.3876660000 | 1.7171440000  | -1.1240410000 |
| C | 0.1033970000  | 3.8186830000  | 2.1426600000  |
| H | 2.1952010000  | 3.8225000000  | 1.5424190000  |
| C | -1.1604130000 | 3.3605370000  | 1.7751980000  |
| H | -2.0412800000 | 3.5933930000  | 2.3535330000  |
| N | -2.6609390000 | 2.1988370000  | 0.2670890000  |
| H | 1.5333260000  | 0.2166490000  | 0.5949150000  |
| O | -3.6374470000 | 2.9563000000  | 0.6083600000  |
| O | 3.6374500000  | -2.9563420000 | 0.6084020000  |
| N | 2.6609480000  | -2.1988820000 | 0.2671140000  |

|   |               |               |               |
|---|---------------|---------------|---------------|
| C | -0.3375660000 | -4.6683930000 | 3.4044390000  |
| C | -0.9299810000 | -6.0369130000 | 2.9943330000  |
| H | -1.1010930000 | -6.6537400000 | 3.8817060000  |
| H | -1.8843390000 | -5.9286300000 | 2.4740020000  |
| H | -0.2462190000 | -6.5758270000 | 2.3329490000  |
| C | -1.3301950000 | -3.9374030000 | 4.3382540000  |
| H | -1.5036100000 | -4.5299210000 | 5.2415350000  |
| H | -0.9366770000 | -2.9634050000 | 4.6419720000  |
| H | -2.2974510000 | -3.7729360000 | 3.8578770000  |
| C | 0.9643240000  | -4.9210200000 | 4.1856800000  |
| H | 1.7004720000  | -5.4637550000 | 3.5869910000  |
| H | 1.4216690000  | -3.9889270000 | 4.5280980000  |
| H | 0.7473180000  | -5.5262910000 | 5.0698270000  |
| C | -5.3975570000 | -0.0643310000 | -3.2494190000 |
| C | -6.0310680000 | 1.3279380000  | -3.4223920000 |
| H | -6.8004470000 | 1.2844110000  | -4.1978290000 |
| H | -6.5083670000 | 1.6760780000  | -2.5027020000 |
| H | -5.2948260000 | 2.0751930000  | -3.7305520000 |
| C | -4.7848820000 | -0.4890900000 | -4.6041030000 |
| H | -3.9925730000 | 0.2005230000  | -4.9082690000 |
| H | -4.3571990000 | -1.4933880000 | -4.5614720000 |
| H | -5.5539200000 | -0.4867710000 | -5.3825320000 |
| C | -6.5149820000 | -1.0586200000 | -2.8560490000 |
| H | -6.9658080000 | -0.7802480000 | -1.8996640000 |
| H | -7.3024010000 | -1.0596140000 | -3.6157860000 |
| H | -6.1381970000 | -2.0798970000 | -2.7645270000 |
| C | 0.3374960000  | 4.6684730000  | 3.4043740000  |
| C | -0.9644490000 | 4.9212050000  | 4.1854870000  |
| H | -1.4218420000 | 3.9891540000  | 4.5279560000  |
| H | -0.7474990000 | 5.5265570000  | 5.0695910000  |
| H | -1.7005350000 | 5.4638980000  | 3.5866850000  |



|   |               |               |               |
|---|---------------|---------------|---------------|
| C | 1.3300170000  | 3.9375060000  | 4.3383240000  |
| H | 2.2973190000  | 3.7729940000  | 3.8580530000  |
| H | 1.5033580000  | 4.5300680000  | 5.2415910000  |
| H | 0.9364510000  | 2.9635320000  | 4.6420540000  |
| C | 0.9300000000  | 6.0369370000  | 2.9942130000  |
| H | 1.8843870000  | 5.9285710000  | 2.4739530000  |
| H | 0.2463080000  | 6.5758350000  | 2.3327420000  |
| H | 1.1010780000  | 6.6538220000  | 3.8815520000  |
| C | 5.3976150000  | 0.0643150000  | -3.2493480000 |
| C | 6.0312890000  | -1.3278970000 | -3.4222000000 |
| H | 6.8007460000  | -1.2843180000 | -4.1975550000 |
| H | 6.5085130000  | -1.6759500000 | -2.5024370000 |
| H | 5.2951660000  | -2.0752430000 | -3.7304210000 |
| C | 6.5149480000  | 1.0587770000  | -2.8561980000 |
| H | 6.9659050000  | 0.7805820000  | -1.8998220000 |
| H | 7.3022930000  | 1.0597710000  | -3.6160110000 |
| H | 6.1380780000  | 2.0800310000  | -2.7647680000 |
| C | 4.7847740000  | 0.4888470000  | -4.6040420000 |
| H | 3.9925450000  | -0.2009180000 | -4.9080640000 |
| H | 4.3569450000  | 1.4930830000  | -4.5614460000 |
| H | 5.5537500000  | 0.4865640000  | -5.3825330000 |
| O | -2.0921800000 | -2.5613000000 | -0.6750780000 |
| O | 2.0922060000  | 2.5612630000  | -0.6750410000 |

S-ECP1

|   |               |               |               |
|---|---------------|---------------|---------------|
| C | -1.2660990000 | 0.1331270000  | 1.5730100000  |
| C | -1.3616850000 | 0.9014930000  | 0.4141850000  |
| C | -2.5029670000 | 0.7862610000  | -0.3781830000 |
| C | -3.5307690000 | -0.0867250000 | -0.0150480000 |
| C | -3.4568270000 | -0.8492640000 | 1.1544800000  |
| C | -2.3039480000 | -0.7284420000 | 1.9408420000  |

|   |               |               |               |
|---|---------------|---------------|---------------|
| C | 1.5472960000  | 0.0332510000  | 1.5557210000  |
| C | 1.5696950000  | -1.0081540000 | 0.6308050000  |
| C | 2.7084240000  | -1.1856910000 | -0.1560270000 |
| C | 3.8276720000  | -0.3702490000 | 0.0299430000  |
| C | 3.8241200000  | 0.6664880000  | 0.9678990000  |
| C | 2.6580190000  | 0.8676490000  | 1.7164960000  |
| H | -0.5494230000 | 1.5519180000  | 0.1232440000  |
| H | -4.3805820000 | -0.1643710000 | -0.6800050000 |
| H | -2.1864110000 | -1.3160860000 | 2.8405620000  |
| H | 0.7314710000  | -1.6840980000 | 0.5490860000  |
| H | 4.7028720000  | -0.5790350000 | -0.5701250000 |
| H | 2.5964350000  | 1.6715510000  | 2.4367840000  |
| C | 1.9500390000  | -2.4105390000 | -2.3416490000 |
| C | -2.8100170000 | 3.0053330000  | -1.7168590000 |
| N | -2.6210580000 | 1.5018510000  | -1.6228060000 |
| O | -3.0715160000 | 0.8242500000  | -2.6153720000 |
| O | 3.9341880000  | -2.8805830000 | -1.1315410000 |
| N | 2.8065470000  | -2.2704410000 | -1.0939440000 |
| C | 5.0790040000  | 1.5433730000  | 1.1381000000  |
| C | 4.8797270000  | 2.6546740000  | 2.1846680000  |
| H | 5.7949470000  | 3.2470100000  | 2.2664040000  |
| H | 4.0705720000  | 3.3362370000  | 1.9075310000  |
| H | 4.6623580000  | 2.2482780000  | 3.1761270000  |
| C | 5.4317440000  | 2.2110630000  | -0.2112660000 |
| H | 6.3234600000  | 2.8356410000  | -0.1011690000 |
| H | 5.6375710000  | 1.4733250000  | -0.9898090000 |
| H | 4.6129860000  | 2.8474990000  | -0.5588860000 |
| C | 6.2587320000  | 0.6527590000  | 1.5936810000  |
| H | 6.0391160000  | 0.1743070000  | 2.5519690000  |
| H | 6.4750900000  | -0.1354220000 | 0.8693360000  |
| H | 7.1632090000  | 1.2570310000  | 1.7138770000  |

|   |               |               |               |
|---|---------------|---------------|---------------|
| C | -4.6152750000 | -1.7948110000 | 1.5231270000  |
| C | -4.8045450000 | -2.8372970000 | 0.3966120000  |
| H | -5.6312440000 | -3.5106940000 | 0.6422020000  |
| H | -5.0307250000 | -2.3660410000 | -0.5622880000 |
| H | -3.9020240000 | -3.4410290000 | 0.2680200000  |
| C | -4.3583290000 | -2.5496930000 | 2.8399380000  |
| H | -3.4691530000 | -3.1832790000 | 2.7814090000  |
| H | -4.2388570000 | -1.8672000000 | 3.6858120000  |
| H | -5.2097590000 | -3.1992510000 | 3.0592720000  |
| C | -5.9151870000 | -0.9725250000 | 1.6849430000  |
| H | -6.1818600000 | -0.4477350000 | 0.7648440000  |
| H | -6.7483690000 | -1.6323090000 | 1.9453010000  |
| H | -5.8113980000 | -0.2276290000 | 2.4788890000  |
| C | 0.5759460000  | -1.7521210000 | -2.1909600000 |
| H | -0.0359650000 | -2.2397040000 | -1.4303040000 |
| H | 0.6450270000  | -0.6892840000 | -1.9563460000 |
| H | 0.0462140000  | -1.8450310000 | -3.1417330000 |
| C | 1.7867840000  | -3.9137970000 | -2.6051690000 |
| H | 1.2218240000  | -4.0633540000 | -3.5285570000 |
| H | 2.7584400000  | -4.3967940000 | -2.7021730000 |
| H | 1.2423130000  | -4.3931030000 | -1.7873980000 |
| C | 2.7270330000  | -1.7374390000 | -3.4892640000 |
| H | 3.7178230000  | -2.1828280000 | -3.5887980000 |
| H | 2.1866770000  | -1.8668150000 | -4.4305190000 |
| H | 2.8399410000  | -0.6649290000 | -3.3078320000 |
| C | -2.0981640000 | 3.7482980000  | -0.5819330000 |
| H | -2.4505910000 | 3.4401010000  | 0.4034570000  |
| H | -1.0149350000 | 3.6186120000  | -0.6247670000 |
| H | -2.3052790000 | 4.8156760000  | -0.6906530000 |
| C | -4.3256940000 | 3.2723590000  | -1.6503110000 |
| H | -4.5230320000 | 4.3401050000  | -1.7760260000 |

|   |               |              |               |
|---|---------------|--------------|---------------|
| H | -4.8407450000 | 2.7262510000 | -2.4421770000 |
| H | -4.7359550000 | 2.9631420000 | -0.6850460000 |
| C | -2.2399260000 | 3.4472450000 | -3.0713210000 |
| H | -2.4017280000 | 4.5201300000 | -3.2023950000 |
| H | -1.1655360000 | 3.2524530000 | -3.1221320000 |
| H | -2.7254000000 | 2.9147920000 | -3.8881660000 |
| S | 0.1538770000  | 0.2708130000 | 2.6673100000  |

S-ECP2

|   |               |               |               |
|---|---------------|---------------|---------------|
| C | -2.9200130000 | -1.0811550000 | -1.3248530000 |
| C | -2.4187890000 | -0.0698940000 | -0.5071510000 |
| C | -3.1547120000 | 1.1071750000  | -0.3756510000 |
| C | -4.3771910000 | 1.2787470000  | -1.0312120000 |
| C | -4.8806560000 | 0.2739500000  | -1.8577600000 |
| C | -4.1346410000 | -0.9060800000 | -1.9916340000 |
| C | -0.8996750000 | -2.7411050000 | -0.2490850000 |
| C | 0.4221200000  | -2.3342920000 | -0.4295380000 |
| C | 1.3245900000  | -2.5063030000 | 0.6232570000  |
| C | 0.9140770000  | -3.0971660000 | 1.8250980000  |
| C | -0.4053930000 | -3.5069230000 | 2.0123020000  |
| C | -1.3083590000 | -3.3176630000 | 0.9536820000  |
| H | -1.4926830000 | -0.2015530000 | 0.0336570000  |
| H | -4.9078020000 | 2.2043070000  | -0.8679280000 |
| H | -4.5055750000 | -1.7120460000 | -2.6136740000 |
| H | 0.7381990000  | -1.9187670000 | -1.3762300000 |
| H | 1.6637290000  | -3.2300750000 | 2.5904160000  |
| H | -2.3400560000 | -3.6302780000 | 1.0495270000  |
| C | 2.4187910000  | 0.0698760000  | -0.5071310000 |
| C | 2.9200250000  | 1.0811230000  | -1.3248450000 |
| C | 3.1547140000  | -1.1071880000 | -0.3755970000 |
| C | 4.1346620000  | 0.9060380000  | -1.9916060000 |

|   |               |               |               |
|---|---------------|---------------|---------------|
| C | 0.8996740000  | 2.7410950000  | -0.2491340000 |
| C | 4.3772040000  | -1.2787700000 | -1.0311380000 |
| C | 4.8806780000  | -0.2739890000 | -1.8576990000 |
| H | 4.5056040000  | 1.7119930000  | -2.6136550000 |
| C | -0.4221180000 | 2.3342760000  | -0.4295890000 |
| C | 1.3083460000  | 3.3176830000  | 0.9536220000  |
| H | 4.9078140000  | -2.2043260000 | -0.8678280000 |
| C | -1.3245980000 | 2.5063110000  | 0.6231930000  |
| H | -0.7381880000 | 1.9187280000  | -1.3762740000 |
| C | 0.4053710000  | 3.5069670000  | 2.0122300000  |
| H | 2.3400420000  | 3.6303030000  | 1.0494690000  |
| C | -0.9140970000 | 3.0972030000  | 1.8250230000  |
| H | -1.6637560000 | 3.2301290000  | 2.5903320000  |
| N | -2.6991570000 | 2.1562230000  | 0.4837350000  |
| H | 1.4926770000  | 0.2015440000  | 0.0336600000  |
| O | -3.5716730000 | 2.8218090000  | 1.1465170000  |
| O | 3.5716590000  | -2.8217950000 | 1.1466050000  |
| N | 2.6991500000  | -2.1562200000 | 0.4838030000  |
| C | -0.8894860000 | -4.1622510000 | 3.3183660000  |
| C | -1.4166420000 | -5.5830660000 | 3.0084150000  |
| H | -1.7639630000 | -6.0644250000 | 3.9275460000  |
| H | -2.2529580000 | -5.5637520000 | 2.3058180000  |
| H | -0.6292670000 | -6.2059270000 | 2.5753660000  |
| C | -2.0289810000 | -3.3126420000 | 3.9276410000  |
| H | -2.3842710000 | -3.7699620000 | 4.8558980000  |
| H | -1.6832500000 | -2.3013970000 | 4.1589790000  |
| H | -2.8824750000 | -3.2278210000 | 3.2512850000  |
| C | 0.2358670000  | -4.2819330000 | 4.3618690000  |
| H | 1.0632990000  | -4.8988510000 | 4.0016940000  |
| H | 0.6353010000  | -3.3043280000 | 4.6449950000  |
| H | -0.1561330000 | -4.7525290000 | 5.2673350000  |

|   |               |               |               |
|---|---------------|---------------|---------------|
| C | -6.2165190000 | 0.4170300000  | -2.6101980000 |
| C | -6.8849090000 | 1.7805150000  | -2.3564060000 |
| H | -7.8235270000 | 1.8346630000  | -2.9141090000 |
| H | -7.1202680000 | 1.9303340000  | -1.2994800000 |
| H | -6.2557760000 | 2.6107060000  | -2.6886610000 |
| C | -5.9681310000 | 0.2768360000  | -4.1300790000 |
| H | -5.2876950000 | 1.0542330000  | -4.4882560000 |
| H | -5.5340060000 | -0.6922520000 | -4.3864350000 |
| H | -6.9115480000 | 0.3733810000  | -4.6758300000 |
| C | -7.1884000000 | -0.6919670000 | -2.1432260000 |
| H | -7.3817480000 | -0.6148350000 | -1.0698580000 |
| H | -8.1440040000 | -0.6005260000 | -2.6683540000 |
| H | -6.7939750000 | -1.6912180000 | -2.3417330000 |
| C | 0.8894510000  | 4.1623270000  | 3.3182830000  |
| C | -0.2359110000 | 4.2820320000  | 4.3617730000  |
| H | -0.6353470000 | 3.3044330000  | 4.6449180000  |
| H | 0.1560800000  | 4.7526500000  | 5.2672310000  |
| H | -1.0633410000 | 4.8989400000  | 4.0015760000  |
| C | 2.0289410000  | 3.3127330000  | 3.9275890000  |
| H | 2.8824410000  | 3.2278960000  | 3.2512420000  |
| H | 2.3842220000  | 3.7700770000  | 4.8558370000  |
| H | 1.6832090000  | 2.3014940000  | 4.1589480000  |
| C | 1.4166070000  | 5.5831350000  | 3.0083030000  |
| H | 2.2529300000  | 5.5638060000  | 2.3057140000  |
| H | 0.6292350000  | 6.2059850000  | 2.5752330000  |
| H | 1.7639190000  | 6.0645160000  | 3.9274260000  |
| C | 6.2165520000  | -0.4170800000 | -2.6101150000 |
| C | 6.8849450000  | -1.7805560000 | -2.3562820000 |
| H | 7.8235700000  | -1.8347130000 | -2.9139710000 |
| H | 7.1202900000  | -1.9303490000 | -1.2993490000 |
| H | 6.2558200000  | -2.6107570000 | -2.6885260000 |

|   |               |               |               |
|---|---------------|---------------|---------------|
| C | 7.1884210000  | 0.6919320000  | -2.1431550000 |
| H | 7.3817560000  | 0.6148250000  | -1.0697830000 |
| H | 8.1440330000  | 0.6004840000  | -2.6682680000 |
| H | 6.7939940000  | 1.6911780000  | -2.3416890000 |
| C | 5.9681840000  | -0.2769220000 | -4.1300030000 |
| H | 5.2877570000  | -1.0543300000 | -4.4881710000 |
| H | 5.5340570000  | 0.6921580000  | -4.3863870000 |
| H | 6.9116080000  | -0.3734740000 | -4.6757390000 |
| S | 2.0550420000  | 2.6273130000  | -1.6233620000 |
| S | -2.0550310000 | -2.6273530000 | -1.6233260000 |

M06/6-311+G(d,p)

B-ECP1

|   |               |               |               |
|---|---------------|---------------|---------------|
| C | -1.3606600000 | -1.4915160000 | -0.0513190000 |
| C | -1.4725980000 | -0.2187040000 | -0.6157570000 |
| C | -2.7034240000 | 0.4330520000  | -0.6602500000 |
| C | -3.8153610000 | -0.1744960000 | -0.0745150000 |
| C | -3.7426860000 | -1.4431990000 | 0.4954430000  |
| C | -2.5138190000 | -2.0986660000 | 0.4687930000  |
| C | 1.3603600000  | -1.4916190000 | 0.0518170000  |
| C | 1.4724660000  | -0.2186900000 | 0.6159600000  |
| C | 2.7033460000  | 0.4329880000  | 0.6601350000  |
| C | 3.8151540000  | -0.1747690000 | 0.0743770000  |
| C | 3.7423140000  | -1.4435990000 | -0.4952760000 |
| C | 2.5134060000  | -2.0989720000 | -0.4683060000 |
| H | -0.5834210000 | 0.2531610000  | -1.0142560000 |
| H | -4.7470130000 | 0.3811390000  | -0.0935830000 |
| H | -2.4208310000 | -3.1026890000 | 0.8724470000  |
| H | 0.5833760000  | 0.2533290000  | 1.0144620000  |
| H | 4.7468460000  | 0.3808100000  | 0.0931790000  |
| H | 2.4202940000  | -3.1030790000 | -0.8717230000 |

|   |              |              |              |
|---|--------------|--------------|--------------|
| C | 2.035860000  | 2.296794000  | 2.336385000  |
| C | -2.035218000 | 2.296487000  | -2.336573000 |
| N | -2.879583000 | 1.718906000  | -1.227326000 |
| O | -3.833990000 | 2.426427000  | -0.787942000 |
| O | 3.834138000  | 2.426259000  | 0.787162000  |
| N | 2.879717000  | 1.718964000  | 1.226882000  |
| H | -0.000237000 | -3.425291000 | 0.000504000  |
| C | 5.001173000  | -2.058818000 | -1.101141000 |
| C | 4.748604000  | -3.452638000 | -1.666870000 |
| H | 5.678692000  | -3.849376000 | -2.088520000 |
| H | 4.411077000  | -4.153597000 | -0.894906000 |
| H | 4.002655000  | -3.438607000 | -2.469494000 |
| C | 6.085908000  | -2.171618000 | -0.026247000 |
| H | 6.989743000  | -2.626595000 | -0.448711000 |
| H | 6.365918000  | -1.195549000 | 0.382068000  |
| H | 5.746384000  | -2.799282000 | 0.805669000  |
| C | 5.500249000  | -1.166120000 | -2.241096000 |
| H | 4.738290000  | -1.070746000 | -3.023154000 |
| H | 5.752076000  | -0.158890000 | -1.894807000 |
| H | 6.400220000  | -1.599067000 | -2.694198000 |
| C | -5.001678000 | -2.058194000 | 1.101257000  |
| C | -6.086307000 | -2.171015000 | 0.026259000  |
| H | -6.990254000 | -2.625798000 | 0.448693000  |
| H | -6.366133000 | -1.194971000 | -0.382243000 |
| H | -5.746777000 | -2.798859000 | -0.805519000 |
| C | -4.749335000 | -3.451967000 | 1.667204000  |
| H | -4.411869000 | -4.153087000 | 0.895360000  |
| H | -4.003424000 | -3.437926000 | 2.469864000  |
| H | -5.679500000 | -3.848514000 | 2.088865000  |
| C | -5.500779000 | -1.165284000 | 2.241034000  |
| H | -5.752469000 | -0.158078000 | 1.894576000  |



|   |               |               |               |
|---|---------------|---------------|---------------|
| H | -6.4008410000 | -1.5980740000 | 2.6941060000  |
| H | -4.7388910000 | -1.0698770000 | 3.0231570000  |
| B | -0.0001840000 | -2.2288660000 | 0.0004040000  |
| C | -1.7073420000 | 1.2324350000  | -3.3784240000 |
| H | -1.2468060000 | 1.7220980000  | -4.2425160000 |
| H | -1.0125670000 | 0.4683070000  | -3.0288870000 |
| H | -2.6207390000 | 0.7346090000  | -3.7205830000 |
| C | -0.7817320000 | 2.9288400000  | -1.7385780000 |
| H | -0.2213730000 | 3.4468330000  | -2.5245420000 |
| H | -1.0651470000 | 3.6655120000  | -0.9794400000 |
| H | -0.1071380000 | 2.1999530000  | -1.2788580000 |
| C | -2.8637570000 | 3.3830110000  | -3.0095830000 |
| H | -2.2827720000 | 3.7909830000  | -3.8428010000 |
| H | -3.8005210000 | 2.9783940000  | -3.4036570000 |
| H | -3.1081600000 | 4.1923720000  | -2.3204980000 |
| C | 0.7823630000  | 2.9295240000  | 1.7388120000  |
| H | 1.0657480000  | 3.6659510000  | 0.9794260000  |
| H | 0.1072890000  | 2.2008260000  | 1.2795030000  |
| H | 0.2225420000  | 3.4478750000  | 2.5249240000  |
| C | 2.8649410000  | 3.3830850000  | 3.0090950000  |
| H | 3.1093850000  | 4.1923400000  | 2.3198980000  |
| H | 2.2843390000  | 3.7912780000  | 3.8424730000  |
| H | 3.8016980000  | 2.9781930000  | 3.4029010000  |
| C | 1.7080280000  | 1.2328810000  | 3.3783880000  |
| H | 2.6213900000  | 0.7347440000  | 3.7201900000  |
| H | 1.2480140000  | 1.7227280000  | 4.2426530000  |
| H | 1.0128440000  | 0.4689890000  | 3.0291570000  |

B-ECP2

|   |              |               |              |
|---|--------------|---------------|--------------|
| C | 1.2337010000 | -2.7893190000 | 0.6193630000 |
| C | 1.7319950000 | -1.5811900000 | 0.1269190000 |

|   |               |               |               |
|---|---------------|---------------|---------------|
| C | 2.9559460000  | -1.1072850000 | 0.5940470000  |
| C | 3.6372440000  | -1.7844100000 | 1.6006470000  |
| C | 3.1397690000  | -2.9632450000 | 2.1498930000  |
| C | 1.9589190000  | -3.4655140000 | 1.6140410000  |
| C | -1.2335720000 | -2.7893060000 | -0.6195870000 |
| C | -1.7319100000 | -1.5812680000 | -0.1269600000 |
| C | -2.9559190000 | -1.1073820000 | -0.5939490000 |
| C | -3.6372490000 | -1.7844370000 | -1.6005750000 |
| C | -3.1397410000 | -2.9631780000 | -2.1500000000 |
| C | -1.9588170000 | -3.4654270000 | -1.6142970000 |
| H | 1.2122340000  | -1.0625380000 | -0.6753300000 |
| H | 4.5906280000  | -1.3730770000 | 1.9160890000  |
| H | 1.5697640000  | -4.4200620000 | 1.9571750000  |
| H | -1.2121260000 | -1.0627000000 | 0.6753260000  |
| H | -4.5906830000 | -1.3731410000 | -1.9159100000 |
| H | -1.5696050000 | -4.4199030000 | -1.9575600000 |
| C | -1.7319850000 | 1.5811870000  | 0.1269620000  |
| C | -1.2336950000 | 2.7893060000  | 0.6194350000  |
| C | -2.9559380000 | 1.1072710000  | 0.5940740000  |
| C | -1.9589190000 | 3.4654800000  | 1.6141230000  |
| C | 1.2335790000  | 2.7893180000  | -0.6195140000 |
| C | -3.6372400000 | 1.7843720000  | 1.6006860000  |
| C | -3.1397700000 | 2.9631970000  | 2.1499590000  |
| H | -1.5697660000 | 4.4200200000  | 1.9572800000  |
| C | 1.7319200000  | 1.5812700000  | -0.1269160000 |
| C | 1.9588180000  | 3.4654610000  | -1.6142130000 |
| H | -4.5906250000 | 1.3730310000  | 1.9161160000  |
| C | 2.9559280000  | 1.1073950000  | -0.5939200000 |
| H | 1.2121410000  | 1.0626830000  | 0.6753610000  |
| C | 3.1397410000  | 2.9632260000  | -2.1499320000 |
| H | 1.5696040000  | 4.4199450000  | -1.9574540000 |

|   |               |               |               |
|---|---------------|---------------|---------------|
| C | 3.6372540000  | 1.7844750000  | -1.6005340000 |
| H | 4.5906880000  | 1.3731860000  | -1.9158810000 |
| N | 3.6182690000  | 0.0000930000  | 0.0001230000  |
| H | -1.2122190000 | 1.0625530000  | -0.6752950000 |
| O | 4.8873810000  | 0.0001470000  | 0.0001960000  |
| O | -4.8873710000 | -0.0001480000 | 0.0001960000  |
| N | -3.6182590000 | -0.0000940000 | 0.0001230000  |
| H | 0.0002050000  | -4.6820730000 | -0.0004100000 |
| C | -3.9248260000 | -3.6680850000 | -3.2507970000 |
| C | -3.1953520000 | -4.8990010000 | -3.7802760000 |
| H | -3.7854270000 | -5.3552500000 | -4.5824790000 |
| H | -2.2137500000 | -4.6431950000 | -4.1954090000 |
| H | -3.0543060000 | -5.6601210000 | -3.0048130000 |
| C | -4.1411430000 | -2.7053050000 | -4.4215580000 |
| H | -4.6897430000 | -3.2088010000 | -5.2262350000 |
| H | -4.7190450000 | -1.8227420000 | -4.1297990000 |
| H | -3.1829480000 | -2.3612970000 | -4.8274550000 |
| C | -5.2808960000 | -4.1137270000 | -2.6964200000 |
| H | -5.1498110000 | -4.8089400000 | -1.8594310000 |
| H | -5.8756770000 | -3.2676750000 | -2.3381250000 |
| H | -5.8591890000 | -4.6236910000 | -3.4761670000 |
| C | 3.9247860000  | -3.6682190000 | 3.2506910000  |
| C | 4.1409420000  | -2.7055340000 | 4.4215610000  |
| H | 4.6894710000  | -3.2090820000 | 5.2262550000  |
| H | 4.7188420000  | -1.8229200000 | 4.1299460000  |
| H | 3.1826900000  | -2.3615970000 | 4.8273840000  |
| C | 3.1953120000  | -4.8992170000 | 3.7799790000  |
| H | 2.2136670000  | -4.6434950000 | 4.1950600000  |
| H | 3.0543610000  | -5.6602590000 | 3.0044220000  |
| H | 3.7853350000  | -5.3555320000 | 4.5821830000  |
| C | 5.2809300000  | -4.1137550000 | 2.6964080000  |

|   |               |               |               |
|---|---------------|---------------|---------------|
| H | 5.8757200000  | -3.2676500000 | 2.3382560000  |
| H | 5.8591630000  | -4.6237740000 | 3.4761630000  |
| H | 5.1499530000  | -4.8088910000 | 1.8593390000  |
| C | 3.9248200000  | 3.6681580000  | -3.2507170000 |
| C | 5.2808870000  | 4.1138000000  | -2.6963320000 |
| H | 5.8756750000  | 3.2677460000  | -2.3380540000 |
| H | 5.8591750000  | 4.6237830000  | -3.4760700000 |
| H | 5.1497970000  | 4.8089960000  | -1.8593310000 |
| C | 4.1411440000  | 2.7054000000  | -4.4214950000 |
| H | 3.1829510000  | 2.3613930000  | -4.8273980000 |
| H | 4.6897400000  | 3.2089150000  | -5.2261630000 |
| H | 4.7190520000  | 1.8228360000  | -4.1297520000 |
| C | 3.1953370000  | 4.8990770000  | -3.7801740000 |
| H | 2.2137350000  | 4.6432730000  | -4.1953070000 |
| H | 3.0542890000  | 5.6601850000  | -3.0046990000 |
| H | 3.7854060000  | 5.3553420000  | -4.5823730000 |
| C | -3.9247950000 | 3.6681470000  | 3.2507680000  |
| C | -4.1409440000 | 2.7054400000  | 4.4216210000  |
| H | -4.6894780000 | 3.2089700000  | 5.2263230000  |
| H | -4.7188380000 | 1.8228280000  | 4.1299900000  |
| H | -3.1826900000 | 2.3615030000  | 4.8274390000  |
| C | -5.2809410000 | 4.1136820000  | 2.6964900000  |
| H | -5.8757240000 | 3.2675790000  | 2.3383230000  |
| H | -5.8591790000 | 4.6236820000  | 3.4762530000  |
| H | -5.1499690000 | 4.8088340000  | 1.8594340000  |
| C | -3.1953310000 | 4.8991410000  | 3.7800770000  |
| H | -2.2136850000 | 4.6434200000  | 4.1951590000  |
| H | -3.0543810000 | 5.6601960000  | 3.0045320000  |
| H | -3.7853600000 | 5.3554410000  | 4.5822860000  |
| H | -0.0002110000 | 4.6820720000  | -0.0003260000 |
| B | 0.0000860000  | -3.4847030000 | -0.0001650000 |

B -0.0000740000 3.4847020000 -0.0000680000

C-ECP1

C 1.8925610000 0.7253960000 -1.1805370000

C 1.4496260000 -0.3695720000 -0.4520090000

C 2.3418150000 -1.1320890000 0.2942570000

C 3.7042410000 -0.8038340000 0.2819640000

C 4.1679340000 0.2811490000 -0.4466760000

C 3.2431320000 1.0450110000 -1.1696480000

C -0.4784300000 1.4876490000 -1.4094920000

C -1.3811120000 0.5389810000 -1.8507060000

C -2.5913170000 0.3545880000 -1.1737210000

C -2.9064390000 1.1801250000 -0.0978660000

C -2.0155280000 2.1575060000 0.3496930000

C -0.8000500000 2.2893480000 -0.3114630000

H 0.4003960000 -0.6130460000 -0.4809740000

H 4.3691320000 -1.4257010000 0.8663320000

H 3.5778850000 1.9088770000 -1.7406280000

H -1.1511700000 -0.1051670000 -2.6941750000

H -3.8663530000 1.0826500000 0.3924420000

H -0.0620490000 3.0113450000 0.0263070000

C -4.4453890000 -1.4195830000 -0.7919120000

C 0.4893290000 -2.5876950000 1.3806160000

N 1.9303280000 -2.2404600000 1.0662130000

O 2.8262290000 -3.0075890000 1.5250190000

O -3.3444490000 -1.0128870000 -2.8547580000

N -3.4461450000 -0.6723650000 -1.6390430000

H 1.2593110000 2.5799460000 -2.0391680000

C -2.3990260000 3.0101640000 1.5558060000

C -1.3305950000 4.0442460000 1.8963930000

H -1.6559740000 4.6352330000 2.7594850000

|   |               |               |               |
|---|---------------|---------------|---------------|
| H | -1.1570120000 | 4.7388800000  | 1.0669100000  |
| H | -0.3763760000 | 3.5749680000  | 2.1603600000  |
| C | -2.5813040000 | 2.0983080000  | 2.7732800000  |
| H | -1.6595150000 | 1.5427930000  | 2.9835670000  |
| H | -2.8319280000 | 2.6921930000  | 3.6603980000  |
| H | -3.3860510000 | 1.3700130000  | 2.6245900000  |
| C | -3.7053340000 | 3.7559710000  | 1.2709660000  |
| H | -3.9822650000 | 4.3755420000  | 2.1321380000  |
| H | -3.5969450000 | 4.4124000000  | 0.4003310000  |
| H | -4.5387600000 | 3.0738350000  | 1.0739130000  |
| C | 5.6443650000  | 0.6666890000  | -0.4786090000 |
| C | 6.5064020000  | -0.2590730000 | 0.3733430000  |
| H | 7.5532990000  | 0.0584910000  | 0.3124980000  |
| H | 6.2137150000  | -0.2332300000 | 1.4288160000  |
| H | 6.4551370000  | -1.2974890000 | 0.0282700000  |
| C | 6.1526770000  | 0.5941670000  | -1.9215030000 |
| H | 6.0404850000  | -0.4197950000 | -2.3218460000 |
| H | 5.6110060000  | 1.2775530000  | -2.5832580000 |
| H | 7.2155480000  | 0.8611950000  | -1.9629360000 |
| C | 5.8122190000  | 2.0930950000  | 0.0521780000  |
| H | 5.4498770000  | 2.1687590000  | 1.0837850000  |
| H | 6.8710000000  | 2.3784800000  | 0.0413740000  |
| H | 5.2649550000  | 2.8249250000  | -0.5504440000 |
| C | 0.9055060000  | 1.5424840000  | -1.9908820000 |
| H | 0.8887440000  | 1.1709130000  | -3.0243020000 |
| C | -4.6653760000 | -2.7743720000 | -1.4521950000 |
| H | -3.7270920000 | -3.3354690000 | -1.5149710000 |
| H | -5.3736460000 | -3.3454070000 | -0.8433770000 |
| H | -5.0672830000 | -2.6735470000 | -2.4606940000 |
| C | -3.9062670000 | -1.6669570000 | 0.6135380000  |
| H | -3.8271260000 | -0.7704760000 | 1.2299070000  |

|   |               |               |               |
|---|---------------|---------------|---------------|
| H | -4.5808490000 | -2.3604840000 | 1.1260580000  |
| H | -2.9153650000 | -2.1317870000 | 0.5669250000  |
| C | -5.7585160000 | -0.6440920000 | -0.7803810000 |
| H | -5.6666420000 | 0.3340250000  | -0.2995470000 |
| H | -6.1088890000 | -0.4890620000 | -1.8057750000 |
| H | -6.5212800000 | -1.2153680000 | -0.2398050000 |
| C | -0.2396640000 | -1.3872840000 | 1.9859460000  |
| H | 0.3318170000  | -0.9874260000 | 2.8305940000  |
| H | -0.4325780000 | -0.5693120000 | 1.2877130000  |
| H | -1.2105230000 | -1.7224900000 | 2.3691150000  |
| C | 0.5174520000  | -3.6944920000 | 2.4259480000  |
| H | -0.5167930000 | -3.9398100000 | 2.6884760000  |
| H | 1.0078300000  | -4.5942070000 | 2.0503420000  |
| H | 1.0427840000  | -3.3772480000 | 3.3301710000  |
| C | -0.1972540000 | -3.1320030000 | 0.1269730000  |
| H | -1.1540050000 | -3.5867050000 | 0.4097300000  |
| H | -0.4040890000 | -2.3745880000 | -0.6345880000 |
| H | 0.4201580000  | -3.9145930000 | -0.3261340000 |

C-ECP2

|   |               |               |               |
|---|---------------|---------------|---------------|
| C | -2.8091560000 | -1.1023340000 | -1.3479040000 |
| C | -2.3075130000 | -0.0382530000 | -0.6173860000 |
| C | -3.0655680000 | 1.1260680000  | -0.4953150000 |
| C | -4.3245300000 | 1.2188560000  | -1.0707730000 |
| C | -4.8471210000 | 0.1577200000  | -1.8078970000 |
| C | -4.0709090000 | -0.9909730000 | -1.9369040000 |
| C | -1.0090330000 | -2.6467320000 | -0.4601670000 |
| C | 0.3209680000  | -2.3010010000 | -0.6226740000 |
| C | 1.2208930000  | -2.5299550000 | 0.4190160000  |
| C | 0.7973230000  | -3.1239910000 | 1.5986730000  |
| C | -0.5407240000 | -3.4708000000 | 1.7840410000  |
| C | -1.4290650000 | -3.2179490000 | 0.7425810000  |

|   |               |               |               |
|---|---------------|---------------|---------------|
| H | -1.3483140000 | -0.1199690000 | -0.1147620000 |
| H | -4.8817440000 | 2.1372860000  | -0.9183260000 |
| H | -4.4448610000 | -1.8404820000 | -2.5015760000 |
| H | 0.6606580000  | -1.8697160000 | -1.5607060000 |
| H | 1.5448820000  | -3.3062150000 | 2.3636190000  |
| H | -2.4822110000 | -3.4649580000 | 0.8461490000  |
| C | 2.3075220000  | 0.0382590000  | -0.6173580000 |
| C | 2.8091720000  | 1.1023330000  | -1.3478800000 |
| C | 3.0655740000  | -1.1260630000 | -0.4952750000 |
| C | 4.0709290000  | 0.9909650000  | -1.9368720000 |
| C | 1.0090410000  | 2.6467360000  | -0.4601700000 |
| C | 4.3245390000  | -1.2188590000 | -1.0707250000 |
| C | 4.8471360000  | -0.1577290000 | -1.8078520000 |
| H | 4.4448860000  | 1.8404680000  | -2.5015470000 |
| C | -0.3209590000 | 2.3010080000  | -0.6226920000 |
| C | 1.4290600000  | 3.2179510000  | 0.7425840000  |
| H | 4.8817500000  | -2.1372880000 | -0.9182670000 |
| C | -1.2208950000 | 2.5299630000  | 0.4189880000  |
| H | -0.6606390000 | 1.8697240000  | -1.5607280000 |
| C | 0.5407070000  | 3.4708030000  | 1.7840340000  |
| H | 2.4822050000  | 3.4649570000  | 0.8461650000  |
| C | -0.7973390000 | 3.1239960000  | 1.5986500000  |
| H | -1.5449070000 | 3.3062220000  | 2.3635860000  |
| N | -2.6009910000 | 2.2225380000  | 0.2796790000  |
| H | 1.3483210000  | 0.1199790000  | -0.1147390000 |
| O | -3.4498970000 | 2.9504520000  | 0.8771060000  |
| O | 3.4498900000  | -2.9504280000 | 0.8771760000  |
| N | 2.6009890000  | -2.2225260000 | 0.2797270000  |
| H | 2.7043280000  | 3.2137540000  | -1.6335730000 |
| H | -2.7043030000 | -3.2137560000 | -1.6335930000 |
| C | -0.9708670000 | -4.1010830000 | 3.1054660000  |



|   |               |               |               |
|---|---------------|---------------|---------------|
| C | -2.4662090000 | -4.3987870000 | 3.1473030000  |
| H | -2.7217250000 | -4.8457710000 | 4.1142190000  |
| H | -3.0679320000 | -3.4897930000 | 3.0355970000  |
| H | -2.7638070000 | -5.1095920000 | 2.3681050000  |
| C | -0.6451490000 | -3.1420650000 | 4.2543460000  |
| H | -0.9529560000 | -3.5817400000 | 5.2104850000  |
| H | 0.4254860000  | -2.9239280000 | 4.3177970000  |
| H | -1.1757030000 | -2.1909690000 | 4.1306900000  |
| C | -0.2159180000 | -5.4183010000 | 3.3073130000  |
| H | -0.4333490000 | -6.1207900000 | 2.4947520000  |
| H | 0.8679590000  | -5.2712780000 | 3.3410660000  |
| H | -0.5198430000 | -5.8856350000 | 4.2515530000  |
| C | -6.2285370000 | 0.2995890000  | -2.4400300000 |
| C | -6.2069360000 | 1.4639630000  | -3.4354010000 |
| H | -7.1904030000 | 1.5778370000  | -3.9069830000 |
| H | -5.9574670000 | 2.4128660000  | -2.9502740000 |
| H | -5.4686780000 | 1.2870870000  | -4.2261160000 |
| C | -6.6586110000 | -0.9572300000 | -3.1893740000 |
| H | -5.9796190000 | -1.1941880000 | -4.0162910000 |
| H | -6.7161780000 | -1.8286300000 | -2.5271470000 |
| H | -7.6551150000 | -0.8032370000 | -3.6175070000 |
| C | -7.2641190000 | 0.5793690000  | -1.3474290000 |
| H | -7.0494240000 | 1.5026980000  | -0.8011240000 |
| H | -8.2619150000 | 0.6783290000  | -1.7912400000 |
| H | -7.2940900000 | -0.2400120000 | -0.6203860000 |
| C | 0.9708350000  | 4.1010870000  | 3.1054630000  |
| C | 0.2158850000  | 5.4183080000  | 3.3072960000  |
| H | -0.8679920000 | 5.2712860000  | 3.3410360000  |
| H | 0.5197990000  | 5.8856450000  | 4.2515380000  |
| H | 0.4333270000  | 6.1207930000  | 2.4947350000  |
| C | 0.6451030000  | 3.1420740000  | 4.2543430000  |

|   |               |               |               |
|---|---------------|---------------|---------------|
| H | 1.1756560000  | 2.1909770000  | 4.1306950000  |
| H | 0.9529020000  | 3.5817510000  | 5.2104830000  |
| H | -0.4255330000 | 2.9239400000  | 4.3177850000  |
| C | 2.4661770000  | 4.3987890000  | 3.1473160000  |
| H | 3.0679000000  | 3.4897940000  | 3.0356130000  |
| H | 2.7637850000  | 5.1095970000  | 2.3681250000  |
| H | 2.7216830000  | 4.8457680000  | 4.1142380000  |
| C | 6.2285580000  | -0.2996040000 | -2.4399720000 |
| C | 6.2069650000  | -1.4639870000 | -3.4353350000 |
| H | 7.1904360000  | -1.5778650000 | -3.9069070000 |
| H | 5.9574910000  | -2.4128850000 | -2.9502020000 |
| H | 5.4687150000  | -1.2871160000 | -4.2260580000 |
| C | 7.2641300000  | -0.5793770000 | -1.3473600000 |
| H | 7.0494270000  | -1.5027010000 | -0.8010480000 |
| H | 8.2619290000  | -0.6783440000 | -1.7911610000 |
| H | 7.2940960000  | 0.2400100000  | -0.6203240000 |
| C | 6.6586400000  | 0.9572080000  | -3.1893220000 |
| H | 5.9796540000  | 1.1941610000  | -4.0162460000 |
| H | 6.7162040000  | 1.8286130000  | -2.5271010000 |
| H | 7.6551470000  | 0.8032100000  | -3.6174470000 |
| C | -2.0079030000 | -2.3701290000 | -1.5462430000 |
| C | 2.0079240000  | 2.3701300000  | -1.5462320000 |
| H | -1.4869890000 | -2.3069320000 | -2.5119900000 |
| H | 1.4870230000  | 2.3069330000  | -2.5119860000 |

#### N-ECP1

|   |               |               |               |
|---|---------------|---------------|---------------|
| C | -1.1983450000 | -1.4213800000 | -0.0589510000 |
| C | -1.3357180000 | -0.0716350000 | 0.2483060000  |
| C | -2.5870030000 | 0.5201140000  | 0.1653320000  |
| C | -3.7047070000 | -0.2107600000 | -0.2075600000 |
| C | -3.5928240000 | -1.5747720000 | -0.4830660000 |

|   |               |               |               |
|---|---------------|---------------|---------------|
| C | -2.3343770000 | -2.1604880000 | -0.4074890000 |
| C | 1.2969310000  | -1.4614400000 | -0.1026580000 |
| C | 1.4926250000  | -0.3007830000 | -0.8421480000 |
| C | 2.7599010000  | 0.2620380000  | -0.8987590000 |
| C | 3.8440040000  | -0.3563460000 | -0.2910150000 |
| C | 3.6729990000  | -1.5453070000 | 0.4184430000  |
| C | 2.3900210000  | -2.0724650000 | 0.5198730000  |
| H | -0.4752880000 | 0.5220260000  | 0.5278510000  |
| H | -4.6517560000 | 0.3131070000  | -0.2939370000 |
| H | -2.2003420000 | -3.2117240000 | -0.6461090000 |
| H | 0.6772510000  | 0.1350430000  | -1.4056150000 |
| H | 4.8190870000  | 0.1078810000  | -0.3989760000 |
| H | 2.2073080000  | -2.9772540000 | 1.0920590000  |
| C | 2.4427060000  | 2.8008610000  | -1.2274630000 |
| C | -2.6982000000 | 2.4980860000  | 1.8027970000  |
| N | -2.7328150000 | 1.9265130000  | 0.4108240000  |
| O | -3.4225460000 | 2.5718470000  | -0.4387130000 |
| O | 4.0466720000  | 1.4945990000  | -2.3465950000 |
| N | 2.9865100000  | 1.4578370000  | -1.6492810000 |
| N | 0.0385860000  | -2.0593770000 | -0.0088030000 |
| H | 0.0233040000  | -3.0605450000 | 0.1165160000  |
| C | 4.8862140000  | -2.2114290000 | 1.0616660000  |
| C | 4.5197030000  | -3.4720510000 | 1.8377540000  |
| H | 5.4253240000  | -3.9060730000 | 2.2753370000  |
| H | 3.8264810000  | -3.2601170000 | 2.6600680000  |
| H | 4.0703440000  | -4.2349410000 | 1.1918380000  |
| C | 5.5537170000  | -1.2350680000 | 2.0341670000  |
| H | 6.4250070000  | -1.7070190000 | 2.5039130000  |
| H | 5.8986930000  | -0.3259680000 | 1.5323500000  |
| H | 4.8583680000  | -0.9388270000 | 2.8280000000  |
| C | 5.8797890000  | -2.5996450000 | -0.0376790000 |

|   |               |               |               |
|---|---------------|---------------|---------------|
| H | 5.4230010000  | -3.3016220000 | -0.7445890000 |
| H | 6.2209160000  | -1.7297390000 | -0.6069630000 |
| H | 6.7617700000  | -3.0822890000 | 0.4005220000  |
| C | -4.8362000000 | -2.3585040000 | -0.8946310000 |
| C | -5.3746760000 | -1.7830030000 | -2.2077220000 |
| H | -6.2663910000 | -2.3366500000 | -2.5251790000 |
| H | -5.6504190000 | -0.7285360000 | -2.1103870000 |
| H | -4.6239030000 | -1.8597140000 | -3.0022810000 |
| C | -4.5495460000 | -3.8416360000 | -1.1074240000 |
| H | -3.8244540000 | -4.0081940000 | -1.9120110000 |
| H | -4.1736030000 | -4.3205200000 | -0.1958070000 |
| H | -5.4749650000 | -4.3545940000 | -1.3911830000 |
| C | -5.9042130000 | -2.2344210000 | 0.1957320000  |
| H | -6.2025350000 | -1.1949580000 | 0.3636470000  |
| H | -6.8019090000 | -2.7957340000 | -0.0896510000 |
| H | -5.5389710000 | -2.6376320000 | 1.1473230000  |
| C | 1.0895990000  | 2.7017350000  | -0.5414050000 |
| H | 0.3078440000  | 2.3033840000  | -1.1969210000 |
| H | 1.1313340000  | 2.0998250000  | 0.3725790000  |
| H | 0.7846790000  | 3.7144680000  | -0.2552150000 |
| C | 2.3189650000  | 3.6520230000  | -2.4805970000 |
| H | 1.9745150000  | 4.6548530000  | -2.2078580000 |
| H | 3.2794430000  | 3.7359520000  | -2.9922800000 |
| H | 1.5931610000  | 3.2151690000  | -3.1743840000 |
| C | 3.4644700000  | 3.3932910000  | -0.2609460000 |
| H | 4.4451070000  | 3.4644510000  | -0.7394710000 |
| H | 3.1522300000  | 4.3961990000  | 0.0495260000  |
| H | 3.5563630000  | 2.7702880000  | 0.6365190000  |
| C | -1.6540400000 | 1.8122860000  | 2.6665640000  |
| H | -1.8444030000 | 0.7418380000  | 2.7830670000  |
| H | -0.6437700000 | 1.9501580000  | 2.2662270000  |

|   |               |              |              |
|---|---------------|--------------|--------------|
| H | -1.6805520000 | 2.2665080000 | 3.6626410000 |
| C | -4.0879500000 | 2.2945620000 | 2.3985570000 |
| H | -4.1411060000 | 2.7444700000 | 3.3958740000 |
| H | -4.8449410000 | 2.7639780000 | 1.7631590000 |
| H | -4.3193180000 | 1.2273070000 | 2.4927310000 |
| C | -2.3698030000 | 3.9762880000 | 1.6795000000 |
| H | -2.3520170000 | 4.4285740000 | 2.6765920000 |
| H | -1.3846540000 | 4.1131660000 | 1.2197240000 |
| H | -3.1094430000 | 4.4967200000 | 1.0689530000 |

N-ECP2

|   |               |               |               |
|---|---------------|---------------|---------------|
| C | 0.1159500000  | 2.9989630000  | 0.0969970000  |
| C | -0.9022810000 | 2.0818060000  | -0.1196590000 |
| C | -2.0333670000 | 2.1336740000  | 0.6936680000  |
| C | -2.1412570000 | 3.0869470000  | 1.7036940000  |
| C | -1.1248510000 | 4.0095880000  | 1.9250690000  |
| C | 0.0052330000  | 3.9491110000  | 1.1131410000  |
| C | 2.1504580000  | 1.9899020000  | -0.9180940000 |
| C | 2.0946900000  | 0.8153530000  | -0.1770800000 |
| C | 3.1049760000  | -0.1260090000 | -0.3539250000 |
| C | 4.1485420000  | 0.0782570000  | -1.2405940000 |
| C | 4.2005450000  | 1.2443030000  | -2.0055440000 |
| C | 3.1919500000  | 2.1810460000  | -1.8366700000 |
| H | -0.8344180000 | 1.3877420000  | -0.9510460000 |
| H | -3.0526940000 | 3.0917770000  | 2.2903550000  |
| H | 0.8312890000  | 4.6390240000  | 1.2575980000  |
| H | 1.3215850000  | 0.6652860000  | 0.5703320000  |
| H | 4.9157660000  | -0.6850480000 | -1.3069210000 |
| H | 3.1870120000  | 3.1013390000  | -2.4137740000 |
| C | 0.9022700000  | -2.0817110000 | -0.1190650000 |
| C | -0.1159760000 | -2.9988740000 | 0.0974910000  |
| C | 2.0332080000  | -2.1334730000 | 0.6944750000  |

|   |               |               |               |
|---|---------------|---------------|---------------|
| C | -0.0054240000 | -3.9489180000 | 1.1137520000  |
| C | -2.1502890000 | -1.9899780000 | -0.9181750000 |
| C | 2.1409290000  | -3.0866340000 | 1.7046250000  |
| C | 1.1245030000  | -4.0092750000 | 1.9259060000  |
| H | -0.8314860000 | -4.6388410000 | 1.2581230000  |
| C | -2.0946700000 | -0.8152780000 | -0.1773870000 |
| C | -3.1916130000 | -2.1813160000 | -1.8369030000 |
| H | 3.0522680000  | -3.0913930000 | 2.2914400000  |
| C | -3.1049380000 | 0.1260360000  | -0.3546020000 |
| H | -1.3217030000 | -0.6650410000 | 0.5701350000  |
| C | -4.2001910000 | -1.2446220000 | -2.0061420000 |
| H | -3.1865750000 | -3.1017220000 | -2.4138250000 |
| C | -4.1483410000 | -0.0784210000 | -1.2414190000 |
| H | -4.9155610000 | 0.6848620000  | -1.3080420000 |
| N | -3.1536120000 | 1.3032510000  | 0.4533000000  |
| H | 0.8345460000  | -1.3877330000 | -0.9505350000 |
| O | -4.2857870000 | 1.6581590000  | 0.8998400000  |
| O | 4.2855790000  | -1.6578880000 | 0.9010390000  |
| N | 3.1534890000  | -1.3030690000 | 0.4542120000  |
| N | 1.2322730000  | 3.0275750000  | -0.7579830000 |
| N | -1.2321310000 | -3.0276160000 | -0.7576990000 |
| H | -1.6235450000 | -3.9477980000 | -0.9038110000 |
| H | 1.6237240000  | 3.9477320000  | -0.9041540000 |
| C | 5.3455800000  | 1.4408160000  | -2.9936260000 |
| C | 5.2506830000  | 2.7684440000  | -3.7385560000 |
| H | 6.0923160000  | 2.8581630000  | -4.4338940000 |
| H | 4.3287230000  | 2.8426950000  | -4.3265360000 |
| H | 5.2960810000  | 3.6242990000  | -3.0552870000 |
| C | 5.3178230000  | 0.3117200000  | -4.0280510000 |
| H | 6.1302770000  | 0.4421560000  | -4.7529580000 |
| H | 5.4392510000  | -0.6719450000 | -3.5641920000 |

|   |               |               |               |
|---|---------------|---------------|---------------|
| H | 4.3689420000  | 0.3094100000  | -4.5767190000 |
| C | 6.6769900000  | 1.4113100000  | -2.2376590000 |
| H | 6.7160540000  | 2.2076430000  | -1.4858130000 |
| H | 6.8373770000  | 0.4588330000  | -1.7234760000 |
| H | 7.5099200000  | 1.5597830000  | -2.9352130000 |
| C | -1.2778880000 | 5.0363510000  | 3.0425580000  |
| C | -1.4471180000 | 4.3090820000  | 4.3794970000  |
| H | -1.5481510000 | 5.0362800000  | 5.1939100000  |
| H | -2.3364080000 | 3.6715900000  | 4.3895360000  |
| H | -0.5776420000 | 3.6769220000  | 4.5929780000  |
| C | -0.0677400000 | 5.9583410000  | 3.1533470000  |
| H | 0.8509540000  | 5.4035770000  | 3.3760240000  |
| H | 0.0898490000  | 6.5377540000  | 2.2364430000  |
| H | -0.2258350000 | 6.6726840000  | 3.9686580000  |
| C | -2.5125780000 | 5.9001160000  | 2.7692490000  |
| H | -3.4293140000 | 5.3042910000  | 2.7269650000  |
| H | -2.6343580000 | 6.6472060000  | 3.5627220000  |
| H | -2.4137590000 | 6.4304170000  | 1.8151260000  |
| C | -5.3450470000 | -1.4413570000 | -2.9943840000 |
| C | -6.6765810000 | -1.4118940000 | -2.2386300000 |
| H | -6.8371370000 | -0.4593720000 | -1.7245810000 |
| H | -7.5093860000 | -1.5605240000 | -2.9362990000 |
| H | -6.7156880000 | -2.2081450000 | -1.4867000000 |
| C | -5.3172380000 | -0.3123770000 | -4.0289330000 |
| H | -4.3682800000 | -0.3100490000 | -4.5774660000 |
| H | -6.1295790000 | -0.4429600000 | -4.7539400000 |
| H | -5.4388120000 | 0.6713300000  | -3.5651990000 |
| C | -5.2499080000 | -2.7690640000 | -3.7391470000 |
| H | -4.3278600000 | -2.8432890000 | -4.3269940000 |
| H | -5.2953110000 | -3.6248450000 | -3.0557860000 |
| H | -6.0914360000 | -2.8589520000 | -4.4345910000 |

|   |               |               |              |
|---|---------------|---------------|--------------|
| C | 1.2773810000  | -5.0359530000 | 3.0434960000 |
| C | 1.4460490000  | -4.3086040000 | 4.3804620000 |
| H | 1.5469210000  | -5.0357580000 | 5.1949360000 |
| H | 2.3352360000  | -3.6709750000 | 4.3907840000 |
| H | 0.5764020000  | -3.6765740000 | 4.5936300000 |
| C | 2.5123290000  | -5.8994790000 | 2.7706030000 |
| H | 3.4289470000  | -5.3034540000 | 2.7285280000 |
| H | 2.6340480000  | -6.6464830000 | 3.5641670000 |
| H | 2.4138930000  | -6.4298720000 | 1.8164910000 |
| C | 0.0673810000  | -5.9581770000 | 3.1539420000 |
| H | -0.8515170000 | -5.4035690000 | 3.3761680000 |
| H | -0.0897230000 | -6.5377650000 | 2.2370660000 |
| H | 0.2253010000  | -6.6723640000 | 3.9694240000 |

O-ECP1

|   |               |               |               |
|---|---------------|---------------|---------------|
| C | -1.1403400000 | -1.4702480000 | -0.0254820000 |
| C | -1.2117150000 | -0.1763380000 | 0.4590590000  |
| C | -2.4304950000 | 0.4886160000  | 0.3973080000  |
| C | -3.5571760000 | -0.1385230000 | -0.1148710000 |
| C | -3.4967250000 | -1.4595900000 | -0.5621910000 |
| C | -2.2696850000 | -2.1143290000 | -0.5172630000 |
| C | 1.2269710000  | -1.5381310000 | -0.1408110000 |
| C | 1.3947410000  | -0.4799140000 | -1.0158720000 |
| C | 2.6389070000  | 0.1330120000  | -1.0777710000 |
| C | 3.7115650000  | -0.3567990000 | -0.3445950000 |
| C | 3.5544900000  | -1.4534810000 | 0.5031940000  |
| C | 2.2896280000  | -2.0275410000 | 0.6078180000  |
| H | -0.3268380000 | 0.3264650000  | 0.8264290000  |
| H | -4.4762360000 | 0.4371000000  | -0.1675030000 |
| H | -2.1469110000 | -3.1315770000 | -0.8717000000 |
| H | 0.5783000000  | -0.1389680000 | -1.6420360000 |



|   |               |               |               |
|---|---------------|---------------|---------------|
| H | 4.6704320000  | 0.1400230000  | -0.4593690000 |
| H | 2.0933510000  | -2.8694210000 | 1.2620100000  |
| C | 2.2097450000  | 2.6018920000  | -1.6979290000 |
| C | -2.4217230000 | 2.3222900000  | 2.2096570000  |
| N | -2.5246150000 | 1.8665450000  | 0.7788060000  |
| O | -3.2045850000 | 2.6120940000  | 0.0080110000  |
| O | 3.8954170000  | 1.2540730000  | -2.6446610000 |
| N | 2.8419740000  | 1.2535480000  | -1.9374160000 |
| C | 4.7536330000  | -1.9714320000 | 1.2919050000  |
| C | 4.3971130000  | -3.1660730000 | 2.1701590000  |
| H | 5.2893450000  | -3.5017870000 | 2.7096410000  |
| H | 3.6365870000  | -2.9115130000 | 2.9170400000  |
| H | 4.0312540000  | -4.0134000000 | 1.5794650000  |
| C | 5.2891550000  | -0.8581500000 | 2.1965140000  |
| H | 6.1437750000  | -1.2228840000 | 2.7786220000  |
| H | 5.6254670000  | 0.0111070000  | 1.6231540000  |
| H | 4.5179490000  | -0.5215550000 | 2.8990510000  |
| C | 5.8483090000  | -2.4071110000 | 0.3131760000  |
| H | 5.4876910000  | -3.2048740000 | -0.3458680000 |
| H | 6.1877890000  | -1.5805550000 | -0.3185480000 |
| H | 6.7168900000  | -2.7866090000 | 0.8645230000  |
| C | -4.7591740000 | -2.1281050000 | -1.0985330000 |
| C | -5.2619730000 | -1.3521080000 | -2.3193910000 |
| H | -6.1667780000 | -1.8240670000 | -2.7208050000 |
| H | -5.5068940000 | -0.3138160000 | -2.0756140000 |
| H | -4.5049360000 | -1.3400860000 | -3.1115290000 |
| C | -4.5150020000 | -3.5732230000 | -1.5202640000 |
| H | -3.7807720000 | -3.6438930000 | -2.3304850000 |
| H | -4.1679310000 | -4.1900980000 | -0.6835350000 |
| H | -5.4505950000 | -4.0095800000 | -1.8863510000 |
| C | -5.8358230000 | -2.1262780000 | -0.0095230000 |

|        |               |               |               |
|--------|---------------|---------------|---------------|
| H      | -6.1073150000 | -1.1118570000 | 0.2985720000  |
| H      | -6.7447630000 | -2.6171480000 | -0.3772260000 |
| H      | -5.4924660000 | -2.6682270000 | 0.8792110000  |
| C      | 0.9874390000  | 2.5252050000  | -0.7965320000 |
| H      | 0.1603900000  | 1.9618060000  | -1.2385780000 |
| H      | 1.2271360000  | 2.0953070000  | 0.1829230000  |
| H      | 0.6259300000  | 3.5460460000  | -0.6316140000 |
| C      | 1.8266600000  | 3.1664010000  | -3.0560310000 |
| H      | 1.4352380000  | 4.1823670000  | -2.9399080000 |
| H      | 2.6959220000  | 3.1971560000  | -3.7169790000 |
| H      | 1.0523810000  | 2.5504170000  | -3.5259270000 |
| C      | 3.2760970000  | 3.4629670000  | -1.0268220000 |
| H      | 4.1629150000  | 3.5372490000  | -1.6604090000 |
| H      | 2.8844160000  | 4.4697090000  | -0.8473050000 |
| H      | 3.5696510000  | 3.0316070000  | -0.0620900000 |
| C      | -1.3749110000 | 1.5400060000  | 2.9832750000  |
| H      | -1.5925790000 | 0.4692400000  | 3.0223850000  |
| H      | -0.3720850000 | 1.6847560000  | 2.5667260000  |
| H      | -1.3613620000 | 1.9137620000  | 4.0123680000  |
| C      | -3.7983770000 | 2.1168100000  | 2.8340000000  |
| H      | -3.8013880000 | 2.4759310000  | 3.8687480000  |
| H      | -4.5568210000 | 2.6686890000  | 2.2709380000  |
| H      | -4.0684150000 | 1.0545530000  | 2.8403200000  |
| C      | -2.0450830000 | 3.7945060000  | 2.1902490000  |
| H      | -1.9770660000 | 4.1643900000  | 3.2186030000  |
| H      | -1.0717830000 | 3.9365090000  | 1.7067580000  |
| H      | -2.7866230000 | 4.3855660000  | 1.6505700000  |
| O      | 0.0252590000  | -2.1917270000 | -0.0194760000 |
| O-ECP2 |               |               |               |
| C      | -2.6214210000 | -1.2640790000 | -0.9291580000 |
| C      | -2.2442200000 | -0.1475920000 | -0.1983660000 |

|   |               |               |               |
|---|---------------|---------------|---------------|
| C | -2.9095730000 | 1.0464370000  | -0.4556150000 |
| C | -3.9255460000 | 1.1339760000  | -1.3990380000 |
| C | -4.2857580000 | 0.0140040000  | -2.1422250000 |
| C | -3.6157070000 | -1.1818200000 | -1.8956760000 |
| C | -1.0440820000 | -2.7017240000 | 0.1311380000  |
| C | 0.2189220000  | -2.2457670000 | -0.2089300000 |
| C | 1.2756660000  | -2.5778660000 | 0.6312870000  |
| C | 1.0704370000  | -3.3549920000 | 1.7725550000  |
| C | -0.2002540000 | -3.7947240000 | 2.1133820000  |
| C | -1.2644390000 | -3.4498460000 | 1.2726680000  |
| H | -1.4865080000 | -0.2103230000 | 0.5760430000  |
| H | -4.4139330000 | 2.0924140000  | -1.5241830000 |
| H | -3.8603940000 | -2.0922300000 | -2.4346060000 |
| H | 0.3701950000  | -1.6877800000 | -1.1276690000 |
| H | 1.9416320000  | -3.6021510000 | 2.3661980000  |
| H | -2.2805670000 | -3.7744240000 | 1.4756010000  |
| C | 2.2442210000  | 0.1475780000  | -0.1983390000 |
| C | 2.6214340000  | 1.2640530000  | -0.9291430000 |
| C | 2.9095790000  | -1.0464550000 | -0.4555560000 |
| C | 3.6157360000  | 1.1817780000  | -1.8956430000 |
| C | 1.0440790000  | 2.7017210000  | 0.1311010000  |
| C | 3.9255680000  | -1.1340100000 | -1.3989600000 |
| C | 4.2857920000  | -0.0140500000 | -2.1421600000 |
| H | 3.8604330000  | 2.0921790000  | -2.4345840000 |
| C | -0.2189200000 | 2.2457530000  | -0.2089730000 |
| C | 1.2644180000  | 3.4498760000  | 1.2726130000  |
| H | 4.4139580000  | -2.0924490000 | -1.5240810000 |
| C | -1.2756760000 | 2.5778700000  | 0.6312220000  |
| H | -0.3701790000 | 1.6877410000  | -1.1276990000 |
| C | 0.2002200000  | 3.7947750000  | 2.1133030000  |
| H | 2.2805420000  | 3.7744590000  | 1.4755540000  |

|   |               |               |               |
|---|---------------|---------------|---------------|
| C | -1.0704640000 | 3.3550260000  | 1.7724720000  |
| H | -1.9416690000 | 3.6021990000  | 2.3660960000  |
| N | -2.6042040000 | 2.2105310000  | 0.3061790000  |
| H | 1.4864950000  | 0.2103220000  | 0.5760560000  |
| O | -3.5585330000 | 2.9570690000  | 0.6779120000  |
| O | 3.5585220000  | -2.9570660000 | 0.6780170000  |
| N | 2.6041990000  | -2.2105360000 | 0.3062540000  |
| C | -0.4686960000 | -4.6381470000 | 3.3553010000  |
| C | -1.0714570000 | -5.9809250000 | 2.9321630000  |
| H | -1.2616490000 | -6.6028170000 | 3.8147360000  |
| H | -2.0205690000 | -5.8572580000 | 2.4012890000  |
| H | -0.3858250000 | -6.5258070000 | 2.2736090000  |
| C | -1.4513890000 | -3.8988760000 | 4.2679480000  |
| H | -1.6450560000 | -4.4900850000 | 5.1706740000  |
| H | -1.0432540000 | -2.9300080000 | 4.5774420000  |
| H | -2.4131990000 | -3.7169830000 | 3.7779370000  |
| C | 0.8034200000  | -4.9159390000 | 4.1490500000  |
| H | 1.5415350000  | -5.4684380000 | 3.5573190000  |
| H | 1.2709910000  | -3.9917490000 | 4.5066370000  |
| H | 0.5605610000  | -5.5245820000 | 5.0267600000  |
| C | -5.3825620000 | 0.0537420000  | -3.2022530000 |
| C | -5.9957540000 | 1.4427660000  | -3.3472630000 |
| H | -6.7754500000 | 1.4177590000  | -4.1161990000 |
| H | -6.4608230000 | 1.7845550000  | -2.4160940000 |
| H | -5.2529270000 | 2.1872010000  | -3.6550850000 |
| C | -4.7959910000 | -0.3519190000 | -4.5572000000 |
| H | -3.9910450000 | 0.3301470000  | -4.8538770000 |
| H | -4.3879310000 | -1.3674520000 | -4.5434470000 |
| H | -5.5735020000 | -0.3160580000 | -5.3293940000 |
| C | -6.4973300000 | -0.9212680000 | -2.8126260000 |
| H | -6.9297410000 | -0.6508710000 | -1.8427610000 |

|   |               |               |               |
|---|---------------|---------------|---------------|
| H | -7.2978940000 | -0.8958430000 | -3.5612650000 |
| H | -6.1371290000 | -1.9526010000 | -2.7441300000 |
| C | 0.4686460000  | 4.6382280000  | 3.3552030000  |
| C | -0.8034600000 | 4.9159260000  | 4.1490040000  |
| H | -1.2709160000 | 3.9917050000  | 4.5066600000  |
| H | -0.5606190000 | 5.5246360000  | 5.0266720000  |
| H | -1.5416620000 | 5.4683190000  | 3.5572820000  |
| C | 1.4514350000  | 3.8990390000  | 4.2678120000  |
| H | 2.4132290000  | 3.7171970000  | 3.7777500000  |
| H | 1.6451150000  | 4.4902790000  | 5.1705150000  |
| H | 1.0433780000  | 2.9301510000  | 4.5773480000  |
| C | 1.0712840000  | 5.9810510000  | 2.9320320000  |
| H | 2.0203890000  | 5.8574570000  | 2.4011290000  |
| H | 0.3855870000  | 6.5258700000  | 2.2734950000  |
| H | 1.2614540000  | 6.6029680000  | 3.8145930000  |
| C | 5.3826120000  | -0.0538060000 | -3.2021710000 |
| C | 5.9958150000  | -1.4428300000 | -3.3471400000 |
| H | 6.7755240000  | -1.4178340000 | -4.1160630000 |
| H | 6.4608700000  | -1.7845960000 | -2.4159560000 |
| H | 5.2529980000  | -2.1872750000 | -3.6549600000 |
| C | 6.4973680000  | 0.9212200000  | -2.8125510000 |
| H | 6.9297690000  | 0.6508480000  | -1.8426750000 |
| H | 7.2979420000  | 0.8957830000  | -3.5611800000 |
| H | 6.1371610000  | 1.9525530000  | -2.7440840000 |
| C | 4.7960570000  | 0.3518200000  | -4.5571350000 |
| H | 3.9911180000  | -0.3302570000 | -4.8538060000 |
| H | 4.3879910000  | 1.3673510000  | -4.5434110000 |
| H | 5.5735780000  | 0.3159450000  | -5.3293180000 |
| O | -2.1039130000 | -2.5103120000 | -0.7256240000 |
| O | 2.1039230000  | 2.5102890000  | -0.7256400000 |

S-ECP1

|   |              |              |              |
|---|--------------|--------------|--------------|
| C | -1.310360000 | -1.668460000 | 0.151777000  |
| C | -1.198164000 | -0.379556000 | 0.650341000  |
| C | -2.290816000 | 0.472581000  | 0.559453000  |
| C | -3.491670000 | 0.028206000  | 0.020729000  |
| C | -3.634674000 | -1.281962000 | -0.431703000 |
| C | -2.520421000 | -2.116883000 | -0.375294000 |
| C | 1.451866000  | -1.731286000 | -0.110049000 |
| C | 1.408557000  | -0.732443000 | -1.071925000 |
| C | 2.517626000  | 0.084704000  | -1.237352000 |
| C | 3.688034000  | -0.157836000 | -0.528572000 |
| C | 3.760483000  | -1.188087000 | 0.406768000  |
| C | 2.614337000  | -1.952386000 | 0.625784000  |
| H | -0.254483000 | -0.021542000 | 1.044294000  |
| H | -4.305374000 | 0.743786000  | -0.049228000 |
| H | -2.568133000 | -3.128800000 | -0.764125000 |
| H | 0.524824000  | -0.584075000 | -1.683137000 |
| H | 4.540233000  | 0.484325000  | -0.731977000 |
| H | 2.607310000  | -2.736344000 | 1.375766000  |
| C | 1.707363000  | 2.424777000  | -1.945831000 |
| C | -2.071448000 | 2.285397000  | 2.373132000  |
| N | -2.184313000 | 1.852513000  | 0.935687000  |
| O | -2.728944000 | 2.683716000  | 0.144826000  |
| O | 3.498987000  | 1.262276000  | -2.949326000 |
| N | 2.494498000  | 1.159512000  | -2.179733000 |
| C | 5.063377000  | -1.425931000 | 1.165165000  |
| C | 4.951157000  | -2.569108000 | 2.168380000  |
| H | 5.912776000  | -2.704604000 | 2.675071000  |
| H | 4.198679000  | -2.366785000 | 2.939322000  |
| H | 4.699982000  | -3.517711000 | 1.680585000  |
| C | 5.451368000  | -0.158020000 | 1.930566000  |

|   |               |               |               |
|---|---------------|---------------|---------------|
| H | 6.3822550000  | -0.3224460000 | 2.4861050000  |
| H | 5.6100060000  | 0.6944210000  | 1.2628120000  |
| H | 4.6709340000  | 0.1169650000  | 2.6494550000  |
| C | 6.1660470000  | -1.7787450000 | 0.1622470000  |
| H | 5.9099430000  | -2.6874360000 | -0.3941430000 |
| H | 6.3324550000  | -0.9786070000 | -0.5655030000 |
| H | 7.1121620000  | -1.9562290000 | 0.6874680000  |
| C | -4.9768950000 | -1.7396760000 | -0.9959300000 |
| C | -5.3256400000 | -0.8950930000 | -2.2245430000 |
| H | -6.2872570000 | -1.2163000000 | -2.6419970000 |
| H | -5.4046120000 | 0.1696300000  | -1.9839200000 |
| H | -4.5625680000 | -1.0064400000 | -3.0030950000 |
| C | -4.9616160000 | -3.2068760000 | -1.4128660000 |
| H | -4.2369260000 | -3.3995830000 | -2.2118860000 |
| H | -4.7320410000 | -3.8688400000 | -0.5700850000 |
| H | -5.9497090000 | -3.4879520000 | -1.7930820000 |
| C | -6.0589000000 | -1.5611930000 | 0.0733860000  |
| H | -6.1649770000 | -0.5160410000 | 0.3809410000  |
| H | -7.0293960000 | -1.8948960000 | -0.3123370000 |
| H | -5.8262080000 | -2.1531190000 | 0.9660290000  |
| C | 0.5094260000  | 2.1952080000  | -1.0410740000 |
| H | -0.2240090000 | 1.5095280000  | -1.4765040000 |
| H | 0.8019280000  | 1.8164820000  | -0.0548870000 |
| H | -0.0039490000 | 3.1508160000  | -0.8881890000 |
| C | 1.2469610000  | 2.9295230000  | -3.3030080000 |
| H | 0.7086840000  | 3.8747580000  | -3.1789940000 |
| H | 2.0981540000  | 3.0927230000  | -3.9671550000 |
| H | 0.5710320000  | 2.2079010000  | -3.7737940000 |
| C | 2.6631490000  | 3.4159730000  | -1.2882470000 |
| H | 3.5371540000  | 3.5857050000  | -1.9222080000 |
| H | 2.1547990000  | 4.3723610000  | -1.1257280000 |

|   |               |               |               |
|---|---------------|---------------|---------------|
| H | 3.0020320000  | 3.0407890000  | -0.3150370000 |
| C | -1.0927840000 | 1.4199340000  | 3.1476020000  |
| H | -1.3944780000 | 0.3698510000  | 3.1832080000  |
| H | -0.0812200000 | 1.4870330000  | 2.7322230000  |
| H | -1.0522880000 | 1.7868290000  | 4.1784950000  |
| C | -3.4682640000 | 2.1760160000  | 2.9768440000  |
| H | -3.4632220000 | 2.5432990000  | 4.0087150000  |
| H | -4.1784920000 | 2.7745430000  | 2.3979870000  |
| H | -3.8117180000 | 1.1354000000  | 2.9878820000  |
| C | -1.5892630000 | 3.7262080000  | 2.3764230000  |
| H | -1.4900330000 | 4.0694230000  | 3.4113450000  |
| H | -0.6109060000 | 3.8056380000  | 1.8899880000  |
| H | -2.2868750000 | 4.3811210000  | 1.8525010000  |
| S | 0.0599290000  | -2.8129760000 | 0.1767460000  |

S-ECP2

|   |               |               |               |
|---|---------------|---------------|---------------|
| C | -2.9306130000 | -1.0036170000 | -1.3950170000 |
| C | -2.3866230000 | -0.0085100000 | -0.5942740000 |
| C | -3.1134820000 | 1.1591190000  | -0.4001940000 |
| C | -4.3657980000 | 1.3391840000  | -0.9824960000 |
| C | -4.9060540000 | 0.3546210000  | -1.7997110000 |
| C | -4.1726110000 | -0.8192410000 | -1.9925190000 |
| C | -0.9672050000 | -2.6446390000 | -0.3531230000 |
| C | 0.3722430000  | -2.3228940000 | -0.5194310000 |
| C | 1.2261180000  | -2.4552590000 | 0.5713910000  |
| C | 0.7510040000  | -2.9139020000 | 1.7984580000  |
| C | -0.5930410000 | -3.2187310000 | 1.9755570000  |
| C | -1.4447820000 | -3.0817700000 | 0.8756980000  |
| H | -1.4262110000 | -0.1472090000 | -0.1076860000 |
| H | -4.8892440000 | 2.2634870000  | -0.7715320000 |
| H | -4.5762290000 | -1.6191970000 | -2.6083000000 |
| H | 0.7389200000  | -1.9881990000 | -1.4843220000 |



|   |               |               |               |
|---|---------------|---------------|---------------|
| H | 1.4730760000  | -3.0191440000 | 2.5993610000  |
| H | -2.5022990000 | -3.3160120000 | 0.9614580000  |
| C | 2.3866230000  | 0.0084950000  | -0.5942590000 |
| C | 2.9306210000  | 1.0035850000  | -1.3950170000 |
| C | 3.1134830000  | -1.1591270000 | -0.4001400000 |
| C | 4.1726290000  | 0.8192000000  | -1.9924970000 |
| C | 0.9672040000  | 2.6446280000  | -0.3531790000 |
| C | 4.3658080000  | -1.3392010000 | -0.9824210000 |
| C | 4.9060730000  | -0.3546550000 | -1.7996500000 |
| H | 4.5762530000  | 1.6191440000  | -2.6082900000 |
| C | -0.3722430000 | 2.3228800000  | -0.5194890000 |
| C | 1.4447720000  | 3.0817840000  | 0.8756370000  |
| H | 4.8892550000  | -2.2634960000 | -0.7714280000 |
| C | -1.2261260000 | 2.4552720000  | 0.5713240000  |
| H | -0.7389140000 | 1.9881640000  | -1.4843740000 |
| C | 0.5930250000  | 3.2187670000  | 1.9754880000  |
| H | 2.5022890000  | 3.3160280000  | 0.9613990000  |
| C | -0.7510200000 | 2.9139410000  | 1.7983840000  |
| H | -1.4730980000 | 3.0192020000  | 2.5992800000  |
| N | -2.6137220000 | 2.1819130000  | 0.4509470000  |
| H | 1.4262030000  | 0.1472050000  | -0.1076890000 |
| O | -3.4320890000 | 2.8614100000  | 1.1399130000  |
| O | 3.4320760000  | -2.8613830000 | 1.1400090000  |
| N | 2.6137150000  | -2.1819020000 | 0.4510190000  |
| C | -1.1620740000 | -3.6844140000 | 3.3122280000  |
| C | -1.7991560000 | -5.0662950000 | 3.1405280000  |
| H | -2.2097620000 | -5.4123220000 | 4.0963140000  |
| H | -2.6161270000 | -5.0565200000 | 2.4120120000  |
| H | -1.0572070000 | -5.7990830000 | 2.8038860000  |
| C | -2.2235030000 | -2.6834400000 | 3.7790610000  |
| H | -2.6354330000 | -2.9949000000 | 4.7461390000  |

|   |               |               |               |
|---|---------------|---------------|---------------|
| H | -1.7907400000 | -1.6836540000 | 3.8997410000  |
| H | -3.0562260000 | -2.6045690000 | 3.0731350000  |
| C | -0.0918940000 | -3.7834210000 | 4.3940070000  |
| H | 0.6898930000  | -4.5053570000 | 4.1334650000  |
| H | 0.3830310000  | -2.8153790000 | 4.5891320000  |
| H | -0.5513680000 | -4.1188180000 | 5.3301330000  |
| C | -6.2646910000 | 0.5096250000  | -2.4763050000 |
| C | -6.9086900000 | 1.8594750000  | -2.1758460000 |
| H | -7.8709370000 | 1.9274120000  | -2.6946690000 |
| H | -7.1017820000 | 1.9928570000  | -1.1057320000 |
| H | -6.2874510000 | 2.6936340000  | -2.5207290000 |
| C | -6.0936880000 | 0.3924730000  | -3.9936280000 |
| H | -5.4218230000 | 1.1715360000  | -4.3713660000 |
| H | -5.6826980000 | -0.5774350000 | -4.2904630000 |
| H | -7.0633690000 | 0.5087150000  | -4.4919180000 |
| C | -7.2078580000 | -0.5896710000 | -1.9785580000 |
| H | -7.3390710000 | -0.5271670000 | -0.8924280000 |
| H | -8.1932130000 | -0.4814010000 | -2.4471630000 |
| H | -6.8358670000 | -1.5916550000 | -2.2149100000 |
| C | 1.1620460000  | 3.6844800000  | 3.3121530000  |
| C | 0.0918460000  | 3.7835520000  | 4.3939070000  |
| H | -0.3831170000 | 2.8155320000  | 4.5890450000  |
| H | 0.5513120000  | 4.1189570000  | 5.3300340000  |
| H | -0.6899100000 | 4.5055090000  | 4.1333290000  |
| C | 2.2234380000  | 2.6834930000  | 3.7790430000  |
| H | 3.0561790000  | 2.6045790000  | 3.0731440000  |
| H | 2.6353490000  | 2.9949710000  | 4.7461240000  |
| H | 1.7906470000  | 1.6837210000  | 3.8997410000  |
| C | 1.7991680000  | 5.0663370000  | 3.1404170000  |
| H | 2.6161510000  | 5.0565150000  | 2.4119150000  |
| H | 1.0572450000  | 5.7991350000  | 2.8037370000  |

|   |               |               |               |
|---|---------------|---------------|---------------|
| H | 2.2097680000  | 5.4123860000  | 4.0961980000  |
| C | 6.2647210000  | -0.5096700000 | -2.4762180000 |
| C | 6.9087180000  | -1.8595120000 | -2.1757160000 |
| H | 7.8709740000  | -1.9274590000 | -2.6945220000 |
| H | 7.1017920000  | -1.9928680000 | -1.1055970000 |
| H | 6.2874880000  | -2.6936800000 | -2.5205910000 |
| C | 7.2078770000  | 0.5896390000  | -1.9784800000 |
| H | 7.3390710000  | 0.5271610000  | -0.8923470000 |
| H | 8.1932410000  | 0.4813600000  | -2.4470660000 |
| H | 6.8358880000  | 1.5916170000  | -2.2148620000 |
| C | 6.0937430000  | -0.3925530000 | -3.9935460000 |
| H | 5.4218870000  | -1.1716270000 | -4.3712780000 |
| H | 5.6827540000  | 0.5773460000  | -4.2904100000 |
| H | 7.0634330000  | -0.5088030000 | -4.4918180000 |
| S | 2.0768490000  | 2.5306300000  | -1.7522030000 |
| S | -2.0768420000 | -2.5306730000 | -1.7521580000 |

PBE0/6-311+G(d,p)

B-ECP1

|   |               |               |               |
|---|---------------|---------------|---------------|
| C | -1.3721890000 | -1.4262650000 | -0.0236590000 |
| C | -1.5290140000 | -0.1530140000 | -0.5845300000 |
| C | -2.7836820000 | 0.4566340000  | -0.6123270000 |
| C | -3.8685230000 | -0.1866170000 | -0.0098240000 |
| C | -3.7488160000 | -1.4525370000 | 0.5619590000  |
| C | -2.4998520000 | -2.0698160000 | 0.5142720000  |
| C | 1.3722740000  | -1.4262250000 | 0.0234340000  |
| C | 1.5290300000  | -0.1530110000 | 0.5844080000  |
| C | 2.7836790000  | 0.4566670000  | 0.6123310000  |

|   |               |               |               |
|---|---------------|---------------|---------------|
| C | 3.8685770000  | -0.1865100000 | 0.0098520000  |
| C | 3.7489410000  | -1.4523910000 | -0.5620330000 |
| C | 2.4999890000  | -2.0697050000 | -0.5144740000 |
| H | -0.6619290000 | 0.3443920000  | -0.9970150000 |
| H | -4.8161690000 | 0.3383570000  | -0.0164530000 |
| H | -2.3719200000 | -3.0698150000 | 0.9132530000  |
| H | 0.6619060000  | 0.3443480000  | 0.9968730000  |
| H | 4.8162100000  | 0.3384860000  | 0.0165820000  |
| H | 2.3721080000  | -3.0696760000 | -0.9135420000 |
| C | 2.2500540000  | 2.3171810000  | 2.3313990000  |
| C | -2.2502510000 | 2.3173200000  | -2.3312850000 |
| N | -3.0197050000 | 1.7331810000  | -1.1799530000 |
| O | -3.9974820000 | 2.4001470000  | -0.7246770000 |
| O | 3.9973330000  | 2.4002680000  | 0.7248480000  |
| N | 3.0196160000  | 1.7331780000  | 1.1800720000  |
| H | 0.0000750000  | -3.3486080000 | -0.0002280000 |
| C | 4.9809390000  | -2.1068020000 | -1.1896270000 |
| C | 4.6749670000  | -3.4979570000 | -1.7465670000 |
| H | 5.5825800000  | -3.9219450000 | -2.1865170000 |
| H | 4.3348230000  | -4.1849810000 | -0.9655520000 |
| H | 3.9128980000  | -3.4640130000 | -2.5311620000 |
| C | 6.0846570000  | -2.2432270000 | -0.1300530000 |
| H | 6.9722640000  | -2.7109680000 | -0.5685470000 |
| H | 6.3843750000  | -1.2723000000 | 0.2730260000  |
| H | 5.7492410000  | -2.8652410000 | 0.7053910000  |
| C | 5.4855470000  | -1.2245940000 | -2.3415510000 |
| H | 4.7186260000  | -1.1151890000 | -3.1143440000 |
| H | 5.7578610000  | -0.2236750000 | -1.9964630000 |
| H | 6.3716670000  | -1.6742510000 | -2.8019160000 |
| C | -4.9807550000 | -2.1070280000 | 1.1895860000  |
| C | -6.0845230000 | -2.2434440000 | 0.1300630000  |

|   |               |               |               |
|---|---------------|---------------|---------------|
| H | -6.9720910000 | -2.7112380000 | 0.5685810000  |
| H | -6.3842960000 | -1.2725090000 | -0.2729560000 |
| H | -5.7491280000 | -2.8654060000 | -0.7054270000 |
| C | -4.6746980000 | -3.4981980000 | 1.7464420000  |
| H | -4.3345590000 | -4.1851680000 | 0.9653780000  |
| H | -3.9125970000 | -3.4642590000 | 2.5310060000  |
| H | -5.5822740000 | -3.9222480000 | 2.1864110000  |
| C | -5.4853370000 | -1.2248970000 | 2.3415810000  |
| H | -5.7577000000 | -0.2239690000 | 1.9965580000  |
| H | -6.3714190000 | -1.6746080000 | 2.8019650000  |
| H | -4.7183810000 | -1.1155070000 | 3.1143420000  |
| B | 0.0000540000  | -2.1461210000 | -0.0001640000 |
| C | -1.9394300000 | 1.2406520000  | -3.3724150000 |
| H | -1.4972940000 | 1.7205520000  | -4.2496300000 |
| H | -1.2397380000 | 0.4822500000  | -3.0224310000 |
| H | -2.8571200000 | 0.7374160000  | -3.6891950000 |
| C | -0.9813760000 | 2.9974280000  | -1.8087510000 |
| H | -0.4781620000 | 3.5134660000  | -2.6316510000 |
| H | -1.2405360000 | 3.7392540000  | -1.0487920000 |
| H | -0.2680470000 | 2.2943290000  | -1.3752700000 |
| C | -3.1442690000 | 3.3724620000  | -2.9798220000 |
| H | -2.6165140000 | 3.7864550000  | -3.8431440000 |
| H | -4.0853960000 | 2.9356850000  | -3.3211280000 |
| H | -3.3792010000 | 4.1796720000  | -2.2867930000 |
| C | 0.9811650000  | 2.9972190000  | 1.8088160000  |
| H | 1.2403260000  | 3.7391550000  | 1.0489650000  |
| H | 0.2679640000  | 2.2940840000  | 1.3751780000  |
| H | 0.4778060000  | 3.5131080000  | 2.6317210000  |
| C | 3.1439510000  | 3.3723390000  | 2.9800830000  |
| H | 3.3788980000  | 4.1796040000  | 2.2871250000  |
| H | 2.6160940000  | 3.7862460000  | 3.8433840000  |

|   |              |              |              |
|---|--------------|--------------|--------------|
| H | 4.0850710000 | 2.9355950000 | 3.3214480000 |
| C | 1.9392280000 | 1.2404140000 | 3.3724230000 |
| H | 2.8569140000 | 0.7371510000 | 3.6891710000 |
| H | 1.4970780000 | 1.7202320000 | 4.2496750000 |
| H | 1.2395400000 | 0.4820410000 | 3.0223630000 |

B-ECP2

|   |               |               |               |
|---|---------------|---------------|---------------|
| C | -1.2424850000 | -2.7938120000 | -0.6119950000 |
| C | -1.7441630000 | -1.5842520000 | -0.1180780000 |
| C | -2.9685710000 | -1.1104120000 | -0.5874260000 |
| C | -3.6501340000 | -1.7888640000 | -1.5957100000 |
| C | -3.1524380000 | -2.9707040000 | -2.1427420000 |
| C | -1.9692910000 | -3.4728910000 | -1.6066850000 |
| C | 1.2430620000  | -2.7936740000 | 0.6118530000  |
| C | 1.7445130000  | -1.5839380000 | 0.1181420000  |
| C | 2.9688030000  | -1.1099040000 | 0.5876290000  |
| C | 3.6504350000  | -1.7883580000 | 1.5958650000  |
| C | 3.1529360000  | -2.9703740000 | 2.1427010000  |
| C | 1.9699410000  | -3.4727450000 | 1.6064920000  |
| H | -1.2257180000 | -1.0640680000 | 0.6805580000  |
| H | -4.6015080000 | -1.3778640000 | -1.9121780000 |
| H | -1.5826770000 | -4.4257420000 | -1.9508030000 |
| H | 1.2260000000  | -1.0637520000 | -0.6804480000 |
| H | 4.6016950000  | -1.3772000000 | 1.9124680000  |
| H | 1.5835220000  | -4.4257370000 | 1.9504450000  |
| C | 1.7441800000  | 1.5842470000  | -0.1181010000 |
| C | 1.2424970000  | 2.7937950000  | -0.6120380000 |
| C | 2.9685850000  | 1.1103980000  | -0.5874480000 |
| C | 1.9692940000  | 3.4728540000  | -1.6067480000 |
| C | -1.2430510000 | 2.7936870000  | 0.6118100000  |
| C | 3.6501390000  | 1.7888300000  | -1.5957510000 |
| C | 3.1524370000  | 2.9706570000  | -2.1428040000 |

|   |               |               |               |
|---|---------------|---------------|---------------|
| H | 1.5826770000  | 4.4256990000  | -1.9508810000 |
| C | -1.7444970000 | 1.5839390000  | 0.1181220000  |
| C | -1.9699390000 | 3.4727800000  | 1.6064270000  |
| H | 4.6015110000  | 1.3778250000  | -1.9122180000 |
| C | -2.9687900000 | 1.1099140000  | 0.5876110000  |
| H | -1.2259760000 | 1.0637350000  | -0.6804520000 |
| C | -3.1529380000 | 2.9704200000  | 2.1426380000  |
| H | -1.5835230000 | 4.4257790000  | 1.9503620000  |
| C | -3.6504300000 | 1.7883910000  | 1.5958260000  |
| H | -4.6016930000 | 1.3772400000  | 1.9124290000  |
| N | -3.6295600000 | -0.0003690000 | 0.0002140000  |
| H | 1.2257420000  | 1.0640790000  | 0.6805510000  |
| O | -4.9001100000 | -0.0006110000 | 0.0003990000  |
| O | 4.9001260000  | 0.0006050000  | 0.0003930000  |
| N | 3.6295760000  | 0.0003660000  | 0.0002110000  |
| H | 0.0005440000  | -4.6886720000 | -0.0003990000 |
| C | 3.9381180000  | -3.6757220000 | 3.2481750000  |
| C | 3.2244220000  | -4.9321890000 | 3.7497440000  |
| H | 3.8125630000  | -5.3888020000 | 4.5512200000  |
| H | 2.2338930000  | -4.7030230000 | 4.1548210000  |
| H | 3.1093380000  | -5.6809100000 | 2.9601550000  |
| C | 4.1157640000  | -2.7160490000 | 4.4343050000  |
| H | 4.6739100000  | -3.2089150000 | 5.2370360000  |
| H | 4.6668070000  | -1.8155010000 | 4.1501150000  |
| H | 3.1463000000  | -2.4047840000 | 4.8349780000  |
| C | 5.3175220000  | -4.0822370000 | 2.7081530000  |
| H | 5.2180030000  | -4.7729440000 | 1.8654800000  |
| H | 5.8909850000  | -3.2169670000 | 2.3653750000  |
| H | 5.8976450000  | -4.5807000000 | 3.4918310000  |
| C | -3.9376170000 | -3.6761310000 | -3.2481700000 |
| C | -4.1160340000 | -2.7163380000 | -4.4340720000 |

|   |               |               |               |
|---|---------------|---------------|---------------|
| H | -4.6742510000 | -3.2093070000 | -5.2366910000 |
| H | -4.6673530000 | -1.8160550000 | -4.1495840000 |
| H | -3.1468330000 | -2.4046220000 | -4.8350300000 |
| C | -3.2235520000 | -4.9322070000 | -3.7502040000 |
| H | -2.2331650000 | -4.7025650000 | -4.1553600000 |
| H | -3.1080760000 | -5.6811260000 | -2.9608610000 |
| H | -3.8116510000 | -5.3888060000 | -4.5517210000 |
| C | -5.3166940000 | -4.0833080000 | -2.7077940000 |
| H | -5.8903540000 | -3.2183170000 | -2.3646360000 |
| H | -5.8968810000 | -4.5818200000 | -3.4913950000 |
| H | -5.2166390000 | -4.7741490000 | -1.8652960000 |
| C | -3.9381300000 | 3.6757940000  | 3.2480880000  |
| C | -5.3175250000 | 4.0823040000  | 2.7080400000  |
| H | -5.8909860000 | 3.2170290000  | 2.3652710000  |
| H | -5.8976570000 | 4.5807830000  | 3.4917020000  |
| H | -5.2179920000 | 4.7729950000  | 1.8653570000  |
| C | -4.1157960000 | 2.7161450000  | 4.4342360000  |
| H | -3.1463390000 | 2.4048820000  | 4.8349260000  |
| H | -4.6739470000 | 3.2090300000  | 5.2369510000  |
| H | -4.6668420000 | 1.8155950000  | 4.1500570000  |
| C | -3.2244350000 | 4.9322680000  | 3.7496420000  |
| H | -2.2339110000 | 4.7031060000  | 4.1547340000  |
| H | -3.1093420000 | 5.6809750000  | 2.9600410000  |
| H | -3.8125830000 | 5.3888970000  | 4.5511050000  |
| C | 3.9376070000  | 3.6760630000  | -3.2482520000 |
| C | 4.1160110000  | 2.7162490000  | -4.4341390000 |
| H | 4.6742200000  | 3.2092020000  | -5.2367720000 |
| H | 4.6673330000  | 1.8159710000  | -4.1496410000 |
| H | 3.1468060000  | 2.4045260000  | -4.8350820000 |
| C | 5.3166890000  | 4.0832490000  | -2.7078970000 |
| H | 5.8903510000  | 3.2182640000  | -2.3647270000 |



|        |               |               |               |
|--------|---------------|---------------|---------------|
| H      | 5.8968700000  | 4.5817450000  | -3.4915130000 |
| H      | 5.2166430000  | 4.7741060000  | -1.8654110000 |
| C      | 3.2235370000  | 4.9321310000  | -3.7503020000 |
| H      | 2.2331460000  | 4.7024820000  | -4.1554450000 |
| H      | 3.1080680000  | 5.6810630000  | -2.9609710000 |
| H      | 3.8116300000  | 5.3887150000  | -4.5518310000 |
| H      | -0.0005470000 | 4.6886700000  | -0.0005150000 |
| B      | 0.0003910000  | -3.4858970000 | -0.0002060000 |
| B      | -0.0003710000 | 3.4858940000  | -0.0002480000 |
| C-ECP1 |               |               |               |
| C      | 0.9209640000  | 0.8187270000  | -1.2791900000 |
| C      | 1.9348340000  | -0.1265850000 | -1.3464070000 |
| C      | 3.0806950000  | 0.0132520000  | -0.5507240000 |
| C      | 3.1796890000  | 1.1059120000  | 0.3123010000  |
| C      | 2.1751030000  | 2.0697920000  | 0.3878960000  |
| C      | 1.0490370000  | 1.9113910000  | -0.4179360000 |
| C      | -1.5589320000 | 0.2539590000  | -1.2941020000 |
| C      | -1.4311500000 | -0.5103710000 | -0.1428590000 |
| C      | -2.5706820000 | -0.9078500000 | 0.5647850000  |
| C      | -3.8330100000 | -0.5429110000 | 0.0900810000  |
| C      | -3.9803290000 | 0.2256950000  | -1.0619380000 |
| C      | -2.8282940000 | 0.6225580000  | -1.7418700000 |
| H      | 1.8049630000  | -0.9745840000 | -2.0038530000 |
| H      | 4.0715710000  | 1.1749750000  | 0.9215200000  |
| H      | 0.2414490000  | 2.6338630000  | -0.3815250000 |
| H      | -0.4399100000 | -0.7918680000 | 0.1791380000  |
| H      | -4.6913180000 | -0.8780080000 | 0.6578180000  |
| H      | -2.9035520000 | 1.2267250000  | -2.6392480000 |
| C      | -1.3113970000 | -1.8650930000 | 2.6179200000  |
| C      | 4.4385700000  | -1.9156720000 | -1.6252990000 |
| N      | 4.1462950000  | -0.9183810000 | -0.5385480000 |

|   |               |               |               |
|---|---------------|---------------|---------------|
| O | 4.9400460000  | -0.8834960000 | 0.4489030000  |
| O | -3.5940350000 | -2.2616030000 | 2.1081940000  |
| N | -2.5226530000 | -1.6919410000 | 1.7419690000  |
| H | -0.5533220000 | 1.5869630000  | -2.6228070000 |
| C | -5.3868260000 | 0.6086150000  | -1.5279430000 |
| C | -5.3680530000 | 1.4518770000  | -2.8037580000 |
| H | -6.3945100000 | 1.6959370000  | -3.0933110000 |
| H | -4.8328980000 | 2.3958800000  | -2.6611680000 |
| H | -4.9083030000 | 0.9163360000  | -3.6401590000 |
| C | -6.0847240000 | 1.4199390000  | -0.4258470000 |
| H | -7.0959160000 | 1.6963260000  | -0.7431090000 |
| H | -6.1687920000 | 0.8512220000  | 0.5037330000  |
| H | -5.5322260000 | 2.3392610000  | -0.2085760000 |
| C | -6.1916800000 | -0.6696350000 | -1.8069430000 |
| H | -5.7170860000 | -1.2648890000 | -2.5929310000 |
| H | -6.2752730000 | -1.2975980000 | -0.9164820000 |
| H | -7.2047840000 | -0.4147240000 | -2.1359910000 |
| C | 2.3477190000  | 3.2547350000  | 1.3407940000  |
| C | 3.6121980000  | 4.0368420000  | 0.9548760000  |
| H | 3.7477600000  | 4.8895780000  | 1.6283920000  |
| H | 4.5086490000  | 3.4146670000  | 1.0174060000  |
| H | 3.5382250000  | 4.4186630000  | -0.0679200000 |
| C | 1.1570520000  | 4.2134650000  | 1.2944260000  |
| H | 1.0195270000  | 4.6448080000  | 0.2980830000  |
| H | 0.2250780000  | 3.7214880000  | 1.5893210000  |
| H | 1.3279830000  | 5.0399730000  | 1.9905480000  |
| C | 2.4902510000  | 2.7330940000  | 2.7786710000  |
| H | 3.3513610000  | 2.0685600000  | 2.8867320000  |
| H | 2.6227600000  | 3.5707160000  | 3.4716270000  |
| H | 1.5970990000  | 2.1784480000  | 3.0824640000  |
| C | -0.3347510000 | 0.6517210000  | -2.0956620000 |

|        |               |               |               |
|--------|---------------|---------------|---------------|
| H      | -0.1629720000 | -0.1005420000 | -2.8754550000 |
| C      | -1.7895930000 | -2.4711680000 | 3.9352290000  |
| H      | -2.2392700000 | -3.4527280000 | 3.7865150000  |
| H      | -0.9246180000 | -2.5723150000 | 4.5963890000  |
| H      | -2.5298950000 | -1.8321850000 | 4.4202990000  |
| C      | -0.3318600000 | -2.8451260000 | 1.9627730000  |
| H      | 0.1063500000  | -2.4675930000 | 1.0383940000  |
| H      | 0.4876710000  | -3.0531240000 | 2.6567440000  |
| H      | -0.8392460000 | -3.7879440000 | 1.7417580000  |
| C      | -0.6690980000 | -0.5087750000 | 2.9198610000  |
| H      | -0.2534080000 | -0.0113360000 | 2.0441960000  |
| H      | -1.4018800000 | 0.1613530000  | 3.3780270000  |
| H      | 0.1459210000  | -0.6582200000 | 3.6335160000  |
| C      | 4.4054390000  | -1.2370010000 | -2.9965820000 |
| H      | 3.4265710000  | -0.8444890000 | -3.2696430000 |
| H      | 5.1210020000  | -0.4108560000 | -3.0268850000 |
| H      | 4.6981550000  | -1.9655280000 | -3.7577950000 |
| C      | 3.4611180000  | -3.0921620000 | -1.5270240000 |
| H      | 3.7552940000  | -3.8669610000 | -2.2409270000 |
| H      | 3.4974770000  | -3.5243260000 | -0.5235770000 |
| H      | 2.4275150000  | -2.8186760000 | -1.7421780000 |
| C      | 5.8516500000  | -2.4434990000 | -1.3885210000 |
| H      | 6.0925090000  | -3.1440360000 | -2.1928210000 |
| H      | 6.5839050000  | -1.6340700000 | -1.3964480000 |
| H      | 5.9331670000  | -2.9604550000 | -0.4325780000 |
| C-ECP2 |               |               |               |
| C      | -2.8164980000 | -1.1265280000 | -1.3333010000 |
| C      | -2.3260670000 | -0.0465270000 | -0.6143600000 |
| C      | -3.0941060000 | 1.1144240000  | -0.5092500000 |
| C      | -4.3537050000 | 1.1892440000  | -1.0916060000 |
| C      | -4.8662560000 | 0.1113310000  | -1.8140010000 |

|   |               |               |               |
|---|---------------|---------------|---------------|
| C | -4.0795520000 | -1.0348490000 | -1.9264090000 |
| C | -0.9833090000 | -2.6532500000 | -0.4330080000 |
| C | 0.3466810000  | -2.3005890000 | -0.6134830000 |
| C | 1.2657160000  | -2.5362720000 | 0.4113580000  |
| C | 0.8648580000  | -3.1456790000 | 1.5936610000  |
| C | -0.4687270000 | -3.5053040000 | 1.7949580000  |
| C | -1.3779480000 | -3.2442820000 | 0.7709630000  |
| H | -1.3694690000 | -0.1155960000 | -0.1108390000 |
| H | -4.9188240000 | 2.1028420000  | -0.9526430000 |
| H | -4.4484010000 | -1.8916400000 | -2.4799170000 |
| H | 0.6743480000  | -1.8646770000 | -1.5510730000 |
| H | 1.6234040000  | -3.3348100000 | 2.3436730000  |
| H | -2.4231950000 | -3.5055260000 | 0.8929590000  |
| C | 2.3260930000  | 0.0465520000  | -0.6143080000 |
| C | 2.8165310000  | 1.1265380000  | -1.3332670000 |
| C | 3.0941210000  | -1.1144050000 | -0.5091860000 |
| C | 4.0795820000  | 1.0348360000  | -1.9263810000 |
| C | 0.9833330000  | 2.6532690000  | -0.4330080000 |
| C | 4.3537150000  | -1.1892480000 | -1.0915450000 |
| C | 4.8662740000  | -0.1113500000 | -1.8139600000 |
| H | 4.4484360000  | 1.8916150000  | -2.4799030000 |
| C | -0.3466550000 | 2.3006160000  | -0.6135150000 |
| C | 1.3779470000  | 3.2442920000  | 0.7709750000  |
| H | 4.9188270000  | -2.1028490000 | -0.9525700000 |
| C | -1.2657110000 | 2.5362970000  | 0.4113060000  |
| H | -0.6743030000 | 1.8647100000  | -1.5511150000 |
| C | 0.4687050000  | 3.5053120000  | 1.7949520000  |
| H | 2.4231930000  | 3.5055300000  | 0.8929960000  |
| C | -0.8648770000 | 3.1456940000  | 1.5936220000  |
| H | -1.6234400000 | 3.3348250000  | 2.3436190000  |
| N | -2.6419540000 | 2.2240470000  | 0.2516560000  |

|   |               |               |               |
|---|---------------|---------------|---------------|
| H | 1.3694990000  | 0.1156360000  | -0.1107830000 |
| O | -3.5014620000 | 2.9626360000  | 0.8232650000  |
| O | 3.5014620000  | -2.9625740000 | 0.8233940000  |
| N | 2.6419590000  | -2.2240110000 | 0.2517420000  |
| H | 2.6835370000  | 3.2421450000  | -1.5853400000 |
| H | -2.6834780000 | -3.2421320000 | -1.5853880000 |
| C | -0.8758490000 | -4.1599990000 | 3.1157370000  |
| C | -2.3712610000 | -4.4759640000 | 3.1694500000  |
| H | -2.6114740000 | -4.9373910000 | 4.1318330000  |
| H | -2.9826830000 | -3.5732960000 | 3.0749830000  |
| H | -2.6678120000 | -5.1785700000 | 2.3845320000  |
| C | -0.5422360000 | -3.2092840000 | 4.2754940000  |
| H | -0.8235510000 | -3.6666780000 | 5.2298300000  |
| H | 0.5255470000  | -2.9789560000 | 4.3170600000  |
| H | -1.0865170000 | -2.2652490000 | 4.1762580000  |
| C | -0.0967440000 | -5.4723470000 | 3.2910610000  |
| H | -0.3196260000 | -6.1704530000 | 2.4785760000  |
| H | 0.9835810000  | -5.3059190000 | 3.3017450000  |
| H | -0.3722530000 | -5.9503960000 | 4.2369650000  |
| C | -6.2527210000 | 0.2290580000  | -2.4490560000 |
| C | -6.2454220000 | 1.3836110000  | -3.4628400000 |
| H | -7.2324310000 | 1.4861620000  | -3.9261590000 |
| H | -5.9972650000 | 2.3368640000  | -2.9888290000 |
| H | -5.5136780000 | 1.2025550000  | -4.2561490000 |
| C | -6.6689630000 | -1.0485860000 | -3.1792950000 |
| H | -5.9856070000 | -1.2923240000 | -3.9986240000 |
| H | -6.7183510000 | -1.9072600000 | -2.5025070000 |
| H | -7.6646770000 | -0.9123920000 | -3.6115300000 |
| C | -7.2908310000 | 0.5178340000  | -1.3543650000 |
| H | -7.0752180000 | 1.4480610000  | -0.8227620000 |
| H | -8.2885990000 | 0.6078960000  | -1.7965040000 |

|   |               |               |               |
|---|---------------|---------------|---------------|
| H | -7.3155020000 | -0.2904540000 | -0.6174180000 |
| C | 0.8758000000  | 4.1599980000  | 3.1157430000  |
| C | 0.0966950000  | 5.4723470000  | 3.2910580000  |
| H | -0.9836310000 | 5.3059220000  | 3.3017190000  |
| H | 0.3721850000  | 5.9503900000  | 4.2369700000  |
| H | 0.3195950000  | 6.1704570000  | 2.4785810000  |
| C | 0.5421600000  | 3.2092780000  | 4.2754870000  |
| H | 1.0864400000  | 2.2652410000  | 4.1762580000  |
| H | 0.8234570000  | 3.6666650000  | 5.2298320000  |
| H | -0.5256240000 | 2.9789530000  | 4.3170300000  |
| C | 2.3712120000  | 4.4759590000  | 3.1694900000  |
| H | 2.9826330000  | 3.5732900000  | 3.0750290000  |
| H | 2.6677820000  | 5.1785700000  | 2.3845830000  |
| H | 2.6114050000  | 4.9373780000  | 4.1318810000  |
| C | 6.2527360000  | -0.2291000000 | -2.4490170000 |
| C | 6.2454230000  | -1.3836620000 | -3.4627890000 |
| H | 7.2324300000  | -1.4862300000 | -3.9261080000 |
| H | 5.9972560000  | -2.3369080000 | -2.9887690000 |
| H | 5.5136800000  | -1.2026070000 | -4.2560990000 |
| C | 7.2908450000  | -0.5178760000 | -1.3543250000 |
| H | 7.0752210000  | -1.4480940000 | -0.8227100000 |
| H | 8.2886110000  | -0.6079560000 | -1.7964640000 |
| H | 7.3155280000  | 0.2904210000  | -0.6173870000 |
| C | 6.6689900000  | 1.0485330000  | -3.1792700000 |
| H | 5.9856320000  | 1.2922720000  | -3.9985970000 |
| H | 6.7183950000  | 1.9072120000  | -2.5024910000 |
| H | 7.6647000000  | 0.9123210000  | -3.6115110000 |
| C | -1.9983320000 | -2.3908670000 | -1.5143800000 |
| C | 1.9983810000  | 2.3908860000  | -1.5143560000 |
| H | -1.4844020000 | -2.3343680000 | -2.4820060000 |
| H | 1.4844760000  | 2.3343990000  | -2.4819970000 |

## N-ECP1

|   |               |               |               |
|---|---------------|---------------|---------------|
| C | -1.2071290000 | -1.3457860000 | -0.0192700000 |
| C | -1.4111300000 | -0.0036580000 | 0.2980600000  |
| C | -2.6892060000 | 0.5326970000  | 0.1845380000  |
| C | -3.7580760000 | -0.2410680000 | -0.2500780000 |
| C | -3.5749150000 | -1.5922710000 | -0.5530810000 |
| C | -2.2959160000 | -2.1259290000 | -0.4335070000 |
| C | 1.3010960000  | -1.3665540000 | 0.0014180000  |
| C | 1.5252230000  | -0.2092510000 | -0.7412460000 |
| C | 2.8196780000  | 0.2944290000  | -0.8343200000 |
| C | 3.8895700000  | -0.3643180000 | -0.2396560000 |
| C | 3.6831200000  | -1.5356350000 | 0.4922970000  |
| C | 2.3822130000  | -2.0119530000 | 0.6171990000  |
| H | -0.5868690000 | 0.6148690000  | 0.6231690000  |
| H | -4.7227140000 | 0.2392660000  | -0.3596750000 |
| H | -2.1119240000 | -3.1653140000 | -0.6829680000 |
| H | 0.7165640000  | 0.2533100000  | -1.2902400000 |
| H | 4.8806660000  | 0.0493820000  | -0.3800920000 |
| H | 2.1781160000  | -2.9057340000 | 1.1963360000  |
| C | 2.6204620000  | 2.8328470000  | -1.3054670000 |
| C | -2.9021230000 | 2.4904510000  | 1.8492010000  |
| N | -2.9229640000 | 1.9198320000  | 0.4597990000  |
| O | -3.6496650000 | 2.5408880000  | -0.3779850000 |
| O | 4.1404290000  | 1.3902470000  | -2.3591300000 |
| N | 3.0999060000  | 1.4471280000  | -1.6325170000 |
| N | 0.0391660000  | -1.9516690000 | 0.1011460000  |
| H | 0.0300210000  | -2.9541050000 | 0.1898460000  |
| C | 4.8797780000  | -2.2404600000 | 1.1335780000  |
| C | 4.4715700000  | -3.4887650000 | 1.9170470000  |
| H | 5.3617930000  | -3.9516330000 | 2.3530230000  |
| H | 3.7886990000  | -3.2502960000 | 2.7386080000  |

|   |               |               |               |
|---|---------------|---------------|---------------|
| H | 3.9945280000  | -4.2356990000 | 1.2749300000  |
| C | 5.5821620000  | -1.2750490000 | 2.1001760000  |
| H | 6.4453100000  | -1.7655500000 | 2.5623940000  |
| H | 5.9419330000  | -0.3791870000 | 1.5878220000  |
| H | 4.9033770000  | -0.9570590000 | 2.8974620000  |
| C | 5.8616350000  | -2.6618310000 | 0.0297780000  |
| H | 5.3860540000  | -3.3539330000 | -0.6715550000 |
| H | 6.2207190000  | -1.8030020000 | -0.5427620000 |
| H | 6.7313760000  | -3.1628700000 | 0.4680100000  |
| C | -4.7681530000 | -2.4236760000 | -1.0276010000 |
| C | -5.3016370000 | -1.8297480000 | -2.3401220000 |
| H | -6.1614870000 | -2.4086640000 | -2.6933620000 |
| H | -5.6222940000 | -0.7924540000 | -2.2147320000 |
| H | -4.5327680000 | -1.8499930000 | -3.1180880000 |
| C | -4.3989270000 | -3.8869490000 | -1.2762290000 |
| H | -3.6452300000 | -3.9909240000 | -2.0628360000 |
| H | -4.0245460000 | -4.3727870000 | -0.3695650000 |
| H | -5.2878460000 | -4.4359980000 | -1.6007110000 |
| C | -5.8742970000 | -2.3826560000 | 0.0373360000  |
| H | -6.2208260000 | -1.3628810000 | 0.2232540000  |
| H | -6.7357210000 | -2.9732450000 | -0.2918520000 |
| H | -5.5199700000 | -2.7961990000 | 0.9864840000  |
| C | 1.3362890000  | 2.8322970000  | -0.4872390000 |
| H | 0.4889890000  | 2.4217090000  | -1.0408450000 |
| H | 1.4503440000  | 2.2846910000  | 0.4515670000  |
| H | 1.0930630000  | 3.8700610000  | -0.2427590000 |
| C | 2.3967040000  | 3.5547350000  | -2.6309540000 |
| H | 2.1172390000  | 4.5945940000  | -2.4410420000 |
| H | 3.3056610000  | 3.5364230000  | -3.2334940000 |
| H | 1.5924220000  | 3.0798590000  | -3.1998510000 |
| C | 3.7388780000  | 3.5067030000  | -0.5048650000 |



|   |               |              |               |
|---|---------------|--------------|---------------|
| H | 4.6701400000  | 3.4913730000 | -1.0745480000 |
| H | 3.4726570000  | 4.5458490000 | -0.2916850000 |
| H | 3.9000410000  | 2.9919550000 | 0.4474650000  |
| C | -1.8828870000 | 1.7956160000 | 2.7424840000  |
| H | -2.0713910000 | 0.7237820000 | 2.8318440000  |
| H | -0.8598820000 | 1.9454480000 | 2.3882490000  |
| H | -1.9525810000 | 2.2335310000 | 3.7420520000  |
| C | -4.3091990000 | 2.3103290000 | 2.4258210000  |
| H | -4.3697770000 | 2.7658710000 | 3.4183000000  |
| H | -5.0446280000 | 2.7883920000 | 1.7749320000  |
| H | -4.5586350000 | 1.2491430000 | 2.5210570000  |
| C | -2.5590230000 | 3.9712340000 | 1.7214370000  |
| H | -2.5870720000 | 4.4396650000 | 2.7091180000  |
| H | -1.5556190000 | 4.1009780000 | 1.3055200000  |
| H | -3.2713630000 | 4.4765860000 | 1.0687270000  |

N-ECP2

|   |               |               |               |
|---|---------------|---------------|---------------|
| C | 0.3229260000  | 2.9599680000  | 0.1171900000  |
| C | -0.7682060000 | 2.1401400000  | -0.1493890000 |
| C | -1.9046840000 | 2.2594000000  | 0.6506840000  |
| C | -1.9511730000 | 3.1809390000  | 1.6957290000  |
| C | -0.8607770000 | 4.0022670000  | 1.9708920000  |
| C | 0.2759350000  | 3.8744990000  | 1.1730100000  |
| C | 2.2977150000  | 1.8499600000  | -0.9175330000 |
| C | 2.1693310000  | 0.6605650000  | -0.2051420000 |
| C | 3.1144470000  | -0.3426450000 | -0.4133040000 |
| C | 4.1667400000  | -0.1845920000 | -1.3032290000 |
| C | 4.2922150000  | 0.9978920000  | -2.0365130000 |
| C | 3.3475360000  | 1.9966990000  | -1.8378320000 |
| H | -0.7513780000 | 1.4761790000  | -1.0048160000 |
| H | -2.8698240000 | 3.2452140000  | 2.2645530000  |
| H | 1.1529090000  | 4.4838090000  | 1.3594110000  |

|   |               |               |               |
|---|---------------|---------------|---------------|
| H | 1.3930070000  | 0.5421610000  | 0.5407990000  |
| H | 4.8812480000  | -0.9927360000 | -1.3946260000 |
| H | 3.4050420000  | 2.9259390000  | -2.3942220000 |
| C | 0.7682310000  | -2.1401740000 | -0.1489350000 |
| C | -0.3229480000 | -2.9599580000 | 0.1175850000  |
| C | 1.9045690000  | -2.2593080000 | 0.6513540000  |
| C | -0.2761420000 | -3.8743210000 | 1.1735590000  |
| C | -2.2975550000 | -1.8501080000 | -0.9176520000 |
| C | 1.9508760000  | -3.1806800000 | 1.6965550000  |
| C | 0.8604300000  | -4.0019610000 | 1.9716600000  |
| H | -1.1531470000 | -4.4836030000 | 1.3599050000  |
| C | -2.1692960000 | -0.6606080000 | -0.2054140000 |
| C | -3.3472120000 | -1.9969810000 | -1.8381160000 |
| H | 2.8694290000  | -3.2448660000 | 2.2655460000  |
| C | -3.1143740000 | 0.3425730000  | -0.4138890000 |
| H | -1.3931030000 | -0.5420930000 | 0.5406460000  |
| C | -4.2918560000 | -0.9982030000 | -2.0371100000 |
| H | -3.4046190000 | -2.9263020000 | -2.3943810000 |
| C | -4.1665100000 | 0.1843880000  | -1.3039760000 |
| H | -4.8810030000 | 0.9925190000  | -1.3956190000 |
| N | -3.0874740000 | 1.5372500000  | 0.3627290000  |
| H | 0.7515520000  | -1.4763490000 | -1.0044700000 |
| O | -4.1978910000 | 2.0069340000  | 0.7594010000  |
| O | 4.1977590000  | -2.0068340000 | 0.7604210000  |
| N | 3.0874110000  | -1.5372060000 | 0.3634880000  |
| N | 1.4455630000  | 2.9374270000  | -0.7298990000 |
| N | -1.4454380000 | -2.9375480000 | -0.7297040000 |
| H | -1.8965720000 | -3.8317370000 | -0.8421150000 |
| H | 1.8967160000  | 3.8316000000  | -0.8423690000 |
| C | 5.4481140000  | 1.1456980000  | -3.0266660000 |
| C | 5.4294030000  | 2.4943780000  | -3.7471090000 |

|   |               |               |               |
|---|---------------|---------------|---------------|
| H | 6.2716750000  | 2.5473720000  | -4.4432320000 |
| H | 4.5124590000  | 2.6337050000  | -4.3282100000 |
| H | 5.5277030000  | 3.3308910000  | -3.0481680000 |
| C | 5.3540770000  | 0.0336230000  | -4.0819920000 |
| H | 6.1778290000  | 0.1220630000  | -4.7981740000 |
| H | 5.4090230000  | -0.9597470000 | -3.6295940000 |
| H | 4.4122150000  | 0.0991600000  | -4.6351010000 |
| C | 6.7786310000  | 1.0203380000  | -2.2690490000 |
| H | 6.8715580000  | 1.8036350000  | -1.5108130000 |
| H | 6.8690940000  | 0.0552120000  | -1.7643310000 |
| H | 7.6188820000  | 1.1165910000  | -2.9647500000 |
| C | -0.9411250000 | 4.9932230000  | 3.1329580000  |
| C | -1.1745400000 | 4.2193250000  | 4.4394010000  |
| H | -1.2394500000 | 4.9147530000  | 5.2827870000  |
| H | -2.1026260000 | 3.6429020000  | 4.4077380000  |
| H | -0.3527910000 | 3.5233680000  | 4.6334850000  |
| C | 0.3390860000  | 5.8162870000  | 3.2841610000  |
| H | 1.2094530000  | 5.1846910000  | 3.4875270000  |
| H | 0.5461200000  | 6.4156620000  | 2.3920020000  |
| H | 0.2308830000  | 6.5068760000  | 4.1256570000  |
| C | -2.1114810000 | 5.9594080000  | 2.8955050000  |
| H | -3.0658200000 | 5.4319400000  | 2.8217380000  |
| H | -2.1845310000 | 6.6722110000  | 3.7235430000  |
| H | -1.9695060000 | 6.5253070000  | 1.9698510000  |
| C | -5.4475810000 | -1.1461560000 | -3.0274430000 |
| C | -6.7782290000 | -1.0207140000 | -2.2700690000 |
| H | -6.8687830000 | -0.0555290000 | -1.7654810000 |
| H | -7.6183610000 | -1.1170530000 | -2.9659030000 |
| H | -6.8712830000 | -1.8039220000 | -1.5117560000 |
| C | -5.3533810000 | -0.0342190000 | -4.0828990000 |
| H | -4.4114250000 | -0.0998180000 | -4.6358410000 |

|   |               |               |               |
|---|---------------|---------------|---------------|
| H | -6.1770110000 | -0.1227650000 | -4.7992080000 |
| H | -5.4084160000 | 0.9592100000  | -3.6306430000 |
| C | -5.4287260000 | -2.4949320000 | -3.7477050000 |
| H | -4.5116800000 | -2.6343190000 | -4.3286290000 |
| H | -5.5271320000 | -3.3313550000 | -3.0486710000 |
| H | -6.2708780000 | -2.5480320000 | -4.4439650000 |
| C | 0.9405750000  | -4.9927320000 | 3.1338990000  |
| C | 1.1737540000  | -4.2186250000 | 4.4402600000  |
| H | 1.2385160000  | -4.9139210000 | 5.2837670000  |
| H | 2.1018430000  | -3.6422040000 | 4.4086720000  |
| H | 0.3519670000  | -3.5226420000 | 4.6340880000  |
| C | 2.1109760000  | -5.9589520000 | 2.8968100000  |
| H | 3.0653290000  | -5.4314960000 | 2.8231410000  |
| H | 2.1838690000  | -6.6716280000 | 3.7249710000  |
| H | 1.9691740000  | -6.5249920000 | 1.9712150000  |
| C | -0.3396610000 | -5.8157760000 | 3.2850060000  |
| H | -1.2100650000 | -5.1841500000 | 3.4881160000  |
| H | -0.5465360000 | -6.4152950000 | 2.3929080000  |
| H | -0.2316040000 | -6.5062270000 | 4.1266340000  |

O-ECP1

|   |               |               |               |
|---|---------------|---------------|---------------|
| C | -1.0937130000 | -1.3913000000 | 0.0965400000  |
| C | -1.2887640000 | -0.1443200000 | 0.6712840000  |
| C | -2.5324530000 | 0.4626310000  | 0.5210980000  |
| C | -3.5437090000 | -0.1602000000 | -0.2028530000 |
| C | -3.3510930000 | -1.4213620000 | -0.7698720000 |
| C | -2.1079420000 | -2.0310540000 | -0.6070910000 |
| C | 1.2780040000  | -1.4044040000 | 0.0900300000  |
| C | 1.4465670000  | -0.4391360000 | -0.8907640000 |
| C | 2.7041640000  | 0.1436520000  | -1.0326340000 |
| C | 3.7681290000  | -0.2678340000 | -0.2355010000 |
| C | 3.5995310000  | -1.2505730000 | 0.7411310000  |

|   |               |               |               |
|---|---------------|---------------|---------------|
| C | 2.3324850000  | -1.8084740000 | 0.9017120000  |
| H | -0.4811510000 | 0.3480550000  | 1.1963290000  |
| H | -4.4789950000 | 0.3741480000  | -0.3208750000 |
| H | -1.8892270000 | -3.0050090000 | -1.0265270000 |
| H | 0.6282710000  | -0.1807030000 | -1.5484910000 |
| H | 4.7339600000  | 0.1887470000  | -0.4144750000 |
| H | 2.1334550000  | -2.5746650000 | 1.6402680000  |
| C | 2.3266650000  | 2.4664650000  | -2.1108480000 |
| C | -2.8995610000 | 2.0495410000  | 2.5184290000  |
| N | -2.7802170000 | 1.7713110000  | 1.0464800000  |
| O | -3.4127710000 | 2.5673560000  | 0.2838980000  |
| O | 4.0923670000  | 1.0123110000  | -2.6348050000 |
| N | 2.9646410000  | 1.1049820000  | -2.0572650000 |
| C | 4.7960190000  | -1.6799160000 | 1.5910680000  |
| C | 4.4182680000  | -2.7396940000 | 2.6271670000  |
| H | 5.3030220000  | -3.0112170000 | 3.2106730000  |
| H | 3.6608770000  | -2.3740540000 | 3.3276730000  |
| H | 4.0415490000  | -3.6530130000 | 2.1567730000  |
| C | 5.3606630000  | -0.4596270000 | 2.3334460000  |
| H | 6.2186550000  | -0.7557180000 | 2.9460170000  |
| H | 5.6963810000  | 0.3171580000  | 1.6416200000  |
| H | 4.6067640000  | -0.0198530000 | 2.9936840000  |
| C | 5.8783490000  | -2.2651390000 | 0.6713160000  |
| H | 5.5006010000  | -3.1389860000 | 0.1322940000  |
| H | 6.2183700000  | -1.5372820000 | -0.0699750000 |
| H | 6.7465020000  | -2.5767990000 | 1.2615700000  |
| C | -4.4905740000 | -2.0817360000 | -1.5470670000 |
| C | -4.8890580000 | -1.1804320000 | -2.7251600000 |
| H | -5.7126010000 | -1.6363290000 | -3.2843700000 |
| H | -5.2170010000 | -0.1931980000 | -2.3899970000 |
| H | -4.0481260000 | -1.0390590000 | -3.4105460000 |

|   |               |               |               |
|---|---------------|---------------|---------------|
| C | -4.0949850000 | -3.4514430000 | -2.1003690000 |
| H | -3.2535850000 | -3.3815220000 | -2.7965170000 |
| H | -3.8268660000 | -4.1521220000 | -1.3037080000 |
| H | -4.9394580000 | -3.8812350000 | -2.6470330000 |
| C | -5.6975140000 | -2.2669000000 | -0.6147560000 |
| H | -6.0547720000 | -1.3124680000 | -0.2191280000 |
| H | -6.5249460000 | -2.7345030000 | -1.1586050000 |
| H | -5.4416840000 | -2.9084940000 | 0.2339880000  |
| C | 0.9082880000  | 2.4789230000  | -1.5572800000 |
| H | 0.2251170000  | 1.8688060000  | -2.1527820000 |
| H | 0.8622230000  | 2.1484880000  | -0.5176640000 |
| H | 0.5389300000  | 3.5072040000  | -1.5942490000 |
| C | 2.3137830000  | 2.8960550000  | -3.5747570000 |
| H | 1.9112880000  | 3.9095230000  | -3.6530590000 |
| H | 3.3216620000  | 2.8811040000  | -3.9901480000 |
| H | 1.6837930000  | 2.2278420000  | -4.1686390000 |
| C | 3.2160120000  | 3.3984220000  | -1.2826300000 |
| H | 4.2380080000  | 3.3823060000  | -1.6674860000 |
| H | 2.8365080000  | 4.4227420000  | -1.3351330000 |
| H | 3.2303070000  | 3.0925980000  | -0.2318730000 |
| C | -1.9656380000 | 1.1783070000  | 3.3482680000  |
| H | -2.1555740000 | 0.1122150000  | 3.2074770000  |
| H | -0.9143740000 | 1.3827850000  | 3.1297730000  |
| H | -2.1331440000 | 1.4110290000  | 4.4034240000  |
| C | -4.3545320000 | 1.7714360000  | 2.9063730000  |
| H | -4.5144380000 | 2.0135560000  | 3.9608050000  |
| H | -5.0272570000 | 2.3824900000  | 2.3004010000  |
| H | -4.6044090000 | 0.7166080000  | 2.7569110000  |
| C | -2.5594700000 | 3.5216730000  | 2.7269550000  |
| H | -2.6882700000 | 3.7792570000  | 3.7817420000  |
| H | -1.5217220000 | 3.7230350000  | 2.4462010000  |

|        |               |               |               |
|--------|---------------|---------------|---------------|
| H      | -3.2095770000 | 4.1572170000  | 2.1252490000  |
| O      | 0.0882070000  | -2.0741780000 | 0.2464680000  |
| O-ECP2 |               |               |               |
| C      | -2.6303340000 | -1.2621010000 | -0.9351390000 |
| C      | -2.2548870000 | -0.1440470000 | -0.2022850000 |
| C      | -2.9241030000 | 1.0505670000  | -0.4552890000 |
| C      | -3.9466420000 | 1.1358380000  | -1.3945380000 |
| C      | -4.3091410000 | 0.0130050000  | -2.1357730000 |
| C      | -3.6325540000 | -1.1831790000 | -1.8962180000 |
| C      | -1.0392970000 | -2.6930530000 | 0.1192740000  |
| C      | 0.2290050000  | -2.2434460000 | -0.2200120000 |
| C      | 1.2834150000  | -2.5755000000 | 0.6266600000  |
| C      | 1.0727950000  | -3.3466540000 | 1.7722620000  |
| C      | -0.2019820000 | -3.7844830000 | 2.1097360000  |
| C      | -1.2638530000 | -3.4402210000 | 1.2635900000  |
| H      | -1.4957590000 | -0.2049010000 | 0.5672120000  |
| H      | -4.4397970000 | 2.0901250000  | -1.5186150000 |
| H      | -3.8776190000 | -2.0897900000 | -2.4379500000 |
| H      | 0.3896600000  | -1.6921150000 | -1.1384820000 |
| H      | 1.9392260000  | -3.5940340000 | 2.3700410000  |
| H      | -2.2786460000 | -3.7632100000 | 1.4667990000  |
| C      | 2.2548930000  | 0.1440380000  | -0.2022570000 |
| C      | 2.6303490000  | 1.2620790000  | -0.9351260000 |
| C      | 2.9241120000  | -1.0505800000 | -0.4552300000 |
| C      | 3.6325820000  | 1.1831380000  | -1.8961910000 |
| C      | 1.0392980000  | 2.6930530000  | 0.1192360000  |
| C      | 3.9466640000  | -1.1358690000 | -1.3944640000 |
| C      | 4.3091710000  | -0.0130500000 | -2.1357150000 |
| H      | 3.8776540000  | 2.0897400000  | -2.4379370000 |
| C      | -0.2289990000 | 2.2434370000  | -0.2200560000 |
| C      | 1.2638370000  | 3.4402480000  | 1.2635390000  |

|   |               |               |               |
|---|---------------|---------------|---------------|
| H | 4.4398200000  | -2.0901580000 | -1.5185160000 |
| C | -1.2834210000 | 2.5755080000  | 0.6265930000  |
| H | -0.3896400000 | 1.6920840000  | -1.1385160000 |
| C | 0.2019540000  | 3.7845280000  | 2.1096610000  |
| H | 2.2786270000  | 3.7632430000  | 1.4667540000  |
| C | -1.0728180000 | 3.3466900000  | 1.7721800000  |
| H | -1.9392570000 | 3.5940830000  | 2.3699410000  |
| N | -2.6134430000 | 2.2129160000  | 0.3038720000  |
| H | 1.4957540000  | 0.2049070000  | 0.5672300000  |
| O | -3.5643980000 | 2.9651940000  | 0.6772740000  |
| O | 3.5643920000  | -2.9651870000 | 0.6773780000  |
| N | 2.6134420000  | -2.2129150000 | 0.3039490000  |
| C | -0.4741170000 | -4.6251680000 | 3.3570710000  |
| C | -1.0787600000 | -5.9726710000 | 2.9341990000  |
| H | -1.2788970000 | -6.5881470000 | 3.8172910000  |
| H | -2.0212460000 | -5.8449000000 | 2.3951500000  |
| H | -0.3914640000 | -6.5221330000 | 2.2842070000  |
| C | -1.4663510000 | -3.8809230000 | 4.2633310000  |
| H | -1.6739750000 | -4.4735180000 | 5.1602540000  |
| H | -1.0593380000 | -2.9158150000 | 4.5796440000  |
| H | -2.4184950000 | -3.6945760000 | 3.7592960000  |
| C | 0.8003230000  | -4.8980740000 | 4.1567380000  |
| H | 1.5385290000  | -5.4527960000 | 3.5699760000  |
| H | 1.2659560000  | -3.9727920000 | 4.5091340000  |
| H | 0.5562880000  | -5.5010570000 | 5.0362740000  |
| C | -5.4135900000 | 0.0531100000  | -3.1926680000 |
| C | -6.0380110000 | 1.4432650000  | -3.3212150000 |
| H | -6.8200300000 | 1.4212940000  | -4.0859060000 |
| H | -6.4996030000 | 1.7714440000  | -2.3851930000 |
| H | -5.3016400000 | 2.1939280000  | -3.6238500000 |
| C | -4.8258960000 | -0.3409120000 | -4.5558950000 |



|   |               |               |               |
|---|---------------|---------------|---------------|
| H | -4.0349930000 | 0.3530870000  | -4.8559050000 |
| H | -4.4011960000 | -1.3482250000 | -4.5407550000 |
| H | -5.6073070000 | -0.3189100000 | -5.3226250000 |
| C | -6.5199550000 | -0.9399190000 | -2.8059070000 |
| H | -6.9547100000 | -0.6814940000 | -1.8358370000 |
| H | -7.3192850000 | -0.9217650000 | -3.5539690000 |
| H | -6.1436620000 | -1.9644990000 | -2.7431960000 |
| C | 0.4740710000  | 4.6252440000  | 3.3569810000  |
| C | -0.8003810000 | 4.8981700000  | 4.1566210000  |
| H | -1.2660220000 | 3.9728970000  | 4.5090310000  |
| H | -0.5563600000 | 5.5011720000  | 5.0361470000  |
| H | -1.5385780000 | 5.4528800000  | 3.5698350000  |
| C | 1.4662900000  | 3.8810210000  | 4.2632730000  |
| H | 2.4184410000  | 3.6946600000  | 3.7592570000  |
| H | 1.6739010000  | 4.4736380000  | 5.1601850000  |
| H | 1.0592710000  | 2.9159210000  | 4.5796050000  |
| C | 1.0787210000  | 5.9727360000  | 2.9340840000  |
| H | 2.0212130000  | 5.8449510000  | 2.3950510000  |
| H | 0.3914330000  | 6.5221840000  | 2.2840690000  |
| H | 1.2788460000  | 6.5882330000  | 3.8171640000  |
| C | 5.4136300000  | -0.0531750000 | -3.1925990000 |
| C | 6.0380590000  | -1.4433310000 | -3.3211080000 |
| H | 6.8200840000  | -1.4213740000 | -4.0857920000 |
| H | 6.4996440000  | -1.7714850000 | -2.3850740000 |
| H | 5.3016940000  | -2.1940040000 | -3.6237320000 |
| C | 6.5199870000  | 0.9398690000  | -2.8058580000 |
| H | 6.9547400000  | 0.6814700000  | -1.8357800000 |
| H | 7.3193210000  | 0.9217010000  | -3.5539150000 |
| H | 6.1436900000  | 1.9644480000  | -2.7431730000 |
| C | 4.8259420000  | 0.3408100000  | -4.5558400000 |
| H | 4.0350440000  | -0.3532010000 | -4.8558360000 |

|        |               |               |               |
|--------|---------------|---------------|---------------|
| H      | 4.4012370000  | 1.3481210000  | -4.5407280000 |
| H      | 5.6073580000  | 0.3187920000  | -5.3225660000 |
| O      | -2.0977320000 | -2.5063740000 | -0.7432140000 |
| O      | 2.0977460000  | 2.5063560000  | -0.7432310000 |
| S-ECP1 |               |               |               |
| C      | -1.3826970000 | -0.2607120000 | -1.5319160000 |
| C      | -1.2310070000 | -0.6647030000 | -0.2112260000 |
| C      | -2.3149360000 | -0.5503480000 | 0.6534050000  |
| C      | -3.5272550000 | -0.0346330000 | 0.2068520000  |
| C      | -3.6962050000 | 0.3565840000  | -1.1218810000 |
| C      | -2.6054800000 | 0.2395560000  | -1.9829480000 |
| C      | 1.3808810000  | -0.1269160000 | -1.7157660000 |
| C      | 1.5350930000  | 1.0672160000  | -1.0202990000 |
| C      | 2.6905500000  | 1.2616750000  | -0.2690350000 |
| C      | 3.7010940000  | 0.3006330000  | -0.2792340000 |
| C      | 3.5691380000  | -0.8873930000 | -0.9956070000 |
| C      | 2.3815420000  | -1.0972080000 | -1.7004330000 |
| H      | -0.2761120000 | -1.0295570000 | 0.1437840000  |
| H      | -4.3271780000 | 0.0690110000  | 0.9305360000  |
| H      | -2.6831360000 | 0.5591500000  | -3.0152130000 |
| H      | 0.7768680000  | 1.8348810000  | -1.0895250000 |
| H      | 4.6017940000  | 0.5216110000  | 0.2814230000  |
| H      | 2.2176550000  | -2.0136700000 | -2.2533640000 |
| C      | 2.0819690000  | 2.9482280000  | 1.5958820000  |
| C      | -2.0483190000 | -2.3053430000 | 2.5227250000  |
| N      | -2.1906770000 | -0.8898750000 | 2.0389110000  |
| O      | -2.7190500000 | -0.0773690000 | 2.8613910000  |
| O      | 4.1286420000  | 2.8940440000  | 0.4444990000  |
| N      | 2.9293730000  | 2.4755450000  | 0.4444930000  |
| C      | 4.7054000000  | -1.9116690000 | -0.9776010000 |
| C      | 4.3814360000  | -3.1492490000 | -1.8153150000 |

|   |               |               |               |
|---|---------------|---------------|---------------|
| H | 5.2245050000  | -3.8452610000 | -1.7771970000 |
| H | 3.5002250000  | -3.6781940000 | -1.4392080000 |
| H | 4.2101960000  | -2.8962170000 | -2.8659900000 |
| C | 4.9652710000  | -2.3601560000 | 0.4682770000  |
| H | 5.7800170000  | -3.0911700000 | 0.4952920000  |
| H | 5.2482170000  | -1.5208850000 | 1.1089230000  |
| H | 4.0744810000  | -2.8278020000 | 0.8989500000  |
| C | 5.9755300000  | -1.2607370000 | -1.5465030000 |
| H | 5.8191180000  | -0.9373150000 | -2.5798250000 |
| H | 6.2797450000  | -0.3862550000 | -0.9656600000 |
| H | 6.8034820000  | -1.9772990000 | -1.5341800000 |
| C | -5.0454880000 | 0.9151550000  | -1.5774030000 |
| C | -5.3690090000 | 2.1787990000  | -0.7661640000 |
| H | -6.3377950000 | 2.5856400000  | -1.0742810000 |
| H | -5.4170690000 | 1.9727260000  | 0.3062290000  |
| H | -4.6091910000 | 2.9497220000  | -0.9250620000 |
| C | -5.0508900000 | 1.2806030000  | -3.0625430000 |
| H | -4.3181010000 | 2.0595360000  | -3.2945020000 |
| H | -4.8458300000 | 0.4131840000  | -3.6975520000 |
| H | -6.0369740000 | 1.6653850000  | -3.3388050000 |
| C | -6.1359580000 | -0.1397840000 | -1.3362580000 |
| H | -6.2139360000 | -0.4088090000 | -0.2795200000 |
| H | -7.1098360000 | 0.2453590000  | -1.6558060000 |
| H | -5.9284110000 | -1.0530780000 | -1.9020780000 |
| C | 0.6095500000  | 2.5953930000  | 1.4340870000  |
| H | 0.1597330000  | 3.0977160000  | 0.5740300000  |
| H | 0.4372290000  | 1.5209630000  | 1.3479010000  |
| H | 0.0791700000  | 2.9389250000  | 2.3259870000  |
| C | 2.2424960000  | 4.4632030000  | 1.6749450000  |
| H | 1.6810890000  | 4.8416480000  | 2.5332860000  |
| H | 3.2915530000  | 4.7372420000  | 1.7871390000  |

|   |               |               |               |
|---|---------------|---------------|---------------|
| H | 1.8546430000  | 4.9411680000  | 0.7709530000  |
| C | 2.6424270000  | 2.2793410000  | 2.8542010000  |
| H | 3.7007170000  | 2.5233990000  | 2.9711820000  |
| H | 2.1008420000  | 2.6304220000  | 3.7369130000  |
| H | 2.5347160000  | 1.1916860000  | 2.8000020000  |
| C | -1.2380180000 | -3.1645840000 | 1.5608630000  |
| H | -1.6860740000 | -3.2126460000 | 0.5661910000  |
| H | -0.2073830000 | -2.8130820000 | 1.4678710000  |
| H | -1.2036490000 | -4.1814420000 | 1.9614590000  |
| C | -3.4640680000 | -2.8715560000 | 2.6623440000  |
| H | -3.4242040000 | -3.8861190000 | 3.0688870000  |
| H | -4.0535970000 | -2.2468020000 | 3.3370790000  |
| H | -3.9653120000 | -2.9124240000 | 1.6905050000  |
| C | -1.3547490000 | -2.2488700000 | 3.8801190000  |
| H | -1.2813640000 | -3.2581680000 | 4.2938570000  |
| H | -0.3442690000 | -1.8415930000 | 3.7829790000  |
| H | -1.9147930000 | -1.6211830000 | 4.5736540000  |
| S | -0.0643240000 | -0.4005400000 | -2.7199750000 |

S-ECP2

|   |               |               |               |
|---|---------------|---------------|---------------|
| C | -2.9107330000 | -1.0375000000 | -1.3446040000 |
| C | -2.3920910000 | -0.0416500000 | -0.5242310000 |
| C | -3.1213020000 | 1.1309270000  | -0.3627870000 |
| C | -4.3535870000 | 1.3142120000  | -0.9879190000 |
| C | -4.8717850000 | 0.3250670000  | -1.8173550000 |
| C | -4.1337980000 | -0.8509720000 | -1.9846740000 |
| C | -0.9318290000 | -2.6937070000 | -0.2920080000 |
| C | 0.3952400000  | -2.3087450000 | -0.4544480000 |
| C | 1.2738810000  | -2.4855850000 | 0.6128050000  |
| C | 0.8365570000  | -3.0565430000 | 1.8096010000  |
| C | -0.4893880000 | -3.4398060000 | 1.9782620000  |
| C | -1.3694750000 | -3.2491710000 | 0.9066030000  |

|   |               |               |               |
|---|---------------|---------------|---------------|
| H | -1.4543960000 | -0.1849440000 | -0.0020970000 |
| H | -4.8807570000 | 2.2393620000  | -0.7988060000 |
| H | -4.5192640000 | -1.6482870000 | -2.6119710000 |
| H | 0.7334910000  | -1.9042560000 | -1.4004350000 |
| H | 1.5731910000  | -3.1952270000 | 2.5895070000  |
| H | -2.4096010000 | -3.5439980000 | 0.9881120000  |
| C | 2.3920940000  | 0.0416320000  | -0.5242110000 |
| C | 2.9107450000  | 1.0374670000  | -1.3445960000 |
| C | 3.1213060000  | -1.1309400000 | -0.3627330000 |
| C | 4.1338190000  | 0.8509290000  | -1.9846460000 |
| C | 0.9318290000  | 2.6936960000  | -0.2920550000 |
| C | 4.3535990000  | -1.3142350000 | -0.9878460000 |
| C | 4.8718060000  | -0.3251060000 | -1.8172950000 |
| H | 4.5192910000  | 1.6482330000  | -2.6119540000 |
| C | -0.3952370000 | 2.3087280000  | -0.4544980000 |
| C | 1.3694640000  | 3.2491890000  | 0.9065460000  |
| H | 4.8807690000  | -2.2393800000 | -0.7987080000 |
| C | -1.2738880000 | 2.4855920000  | 0.6127420000  |
| H | -0.7334780000 | 1.9042170000  | -1.4004790000 |
| C | 0.4893670000  | 3.4398490000  | 1.9781930000  |
| H | 2.4095890000  | 3.5440220000  | 0.9880580000  |
| C | -0.8365760000 | 3.0565790000  | 1.8095290000  |
| H | -1.5732170000 | 3.1952810000  | 2.5894250000  |
| N | -2.6482060000 | 2.1612290000  | 0.4950170000  |
| H | 1.4543920000  | 0.1849350000  | -0.0020920000 |
| O | -3.4925890000 | 2.8250620000  | 1.1701790000  |
| O | 3.4925760000  | -2.8250470000 | 1.1702680000  |
| N | 2.6482010000  | -2.1612260000 | 0.4950850000  |
| C | -1.0024950000 | -4.0661950000 | 3.2751090000  |
| C | -1.5432290000 | -5.4723960000 | 2.9737790000  |
| H | -1.9164590000 | -5.9362640000 | 3.8926290000  |

|   |               |               |               |
|---|---------------|---------------|---------------|
| H | -2.3661150000 | -5.4468230000 | 2.2543490000  |
| H | -0.7576380000 | -6.1133510000 | 2.5628270000  |
| C | -2.1315850000 | -3.1953780000 | 3.8465440000  |
| H | -2.5135140000 | -3.6356840000 | 4.7733660000  |
| H | -1.7727680000 | -2.1866530000 | 4.0719750000  |
| H | -2.9700940000 | -3.1049540000 | 3.1509350000  |
| C | 0.0968370000  | -4.1875410000 | 4.3311440000  |
| H | 0.9202970000  | -4.8232350000 | 3.9922830000  |
| H | 0.5065540000  | -3.2111370000 | 4.6070460000  |
| H | -0.3178480000 | -4.6394740000 | 5.2368680000  |
| C | -6.2123080000 | 0.4800660000  | -2.5370440000 |
| C | -6.8712250000 | 1.8287310000  | -2.2433550000 |
| H | -7.8214800000 | 1.8934220000  | -2.7813230000 |
| H | -7.0853330000 | 1.9552960000  | -1.1779370000 |
| H | -6.2482640000 | 2.6663060000  | -2.5714860000 |
| C | -5.9898080000 | 0.3708470000  | -4.0529660000 |
| H | -5.3170690000 | 1.1576890000  | -4.4069140000 |
| H | -5.5560990000 | -0.5925900000 | -4.3339050000 |
| H | -6.9432760000 | 0.4740760000  | -4.5811970000 |
| C | -7.1659910000 | -0.6334340000 | -2.0777060000 |
| H | -7.3396360000 | -0.5782260000 | -0.9989760000 |
| H | -8.1314790000 | -0.5337640000 | -2.5844190000 |
| H | -6.7718520000 | -1.6278310000 | -2.3039430000 |
| C | 1.0024600000  | 4.0662710000  | 3.2750290000  |
| C | -0.0968820000 | 4.1876400000  | 4.3310510000  |
| H | -0.5065990000 | 3.2112410000  | 4.6069730000  |
| H | 0.3177930000  | 4.6395970000  | 5.2367670000  |
| H | -0.9203410000 | 4.8233230000  | 3.9921670000  |
| C | 2.1315480000  | 3.1954720000  | 3.8464960000  |
| H | 2.9700630000  | 3.1050330000  | 3.1508970000  |
| H | 2.5134660000  | 3.6358020000  | 4.7733100000  |

|   |               |               |               |
|---|---------------|---------------|---------------|
| H | 1.7727320000  | 2.1867510000  | 4.0719490000  |
| C | 1.5431920000  | 5.4724670000  | 2.9736690000  |
| H | 2.3660840000  | 5.4468780000  | 2.2542470000  |
| H | 0.7576030000  | 6.1134090000  | 2.5626950000  |
| H | 1.9164120000  | 5.9363580000  | 3.8925120000  |
| C | 6.2123390000  | -0.4801160000 | -2.5369620000 |
| C | 6.8712570000  | -1.8287710000 | -2.2432350000 |
| H | 7.8215190000  | -1.8934710000 | -2.7811880000 |
| H | 7.0853500000  | -1.9553120000 | -1.1778100000 |
| H | 6.2483040000  | -2.6663560000 | -2.5713560000 |
| C | 7.1660120000  | 0.6333990000  | -2.0776370000 |
| H | 7.3396430000  | 0.5782140000  | -0.9989040000 |
| H | 8.1315070000  | 0.5337210000  | -2.5843360000 |
| H | 6.7718720000  | 1.6277890000  | -2.3039020000 |
| C | 5.9898580000  | -0.3709310000 | -4.0528900000 |
| H | 5.3171260000  | -1.1577830000 | -4.4068300000 |
| H | 5.5561480000  | 0.5924970000  | -4.3338550000 |
| H | 6.9433330000  | -0.4741670000 | -4.5811060000 |
| S | 2.0566200000  | 2.5646130000  | -1.6701330000 |
| S | -2.0566070000 | -2.5646540000 | -1.6700980000 |
